# Supplementary material for: Does truth matter to voters? The effects of correcting political misinformation in an Australian sample
Source: R Soc Open Sci. 2018 Dec 19;5(12):180593. doi: 10.1098/rsos.180593 (PMC6304148; doi:10.1098/rsos.180593)
Supplement: Data in csv format [file rsos180593supp2.csv]

Attention,Attention01,PriorComplete,PC01,Effort,Effort01,PolKnowl1,PolKnowl2,PK01,LL1,LL2,LL3,LL4,LL5,LvsR,PolitOrientScale,POGroup,POGroupMS,Politician,PolCon,Ratio,PO_R,Extr,Extr_mc,MB1,MB2,FB1,FB2,Supp1,Supp2,Vote1,Vote2,Feel1,Feel2,Vera1,Vera2,MBaverage,FBaverage,Supp_average,MBC,FBC,SC,Age,Sex,Source,Edu
Shy,1,Yes,0,Yes	I put in a reasonable effort.,1,Pauline Hanson,Kevin Rudd,1,0.00,0.00,0.00,0.00,0.00,0.00,0.00,L,L,Shorten,1,1,L1,0.50,0.28,0.650,0.350,0.700,0.400,0.670,0.403,0.800,0.400,0.610,0.410,0.600,0.400,0.50,0.55,0.54,-0.300,-0.300,-0.267,19,Female,Online,Some university, but no degree
Shy,1,,1,Yes	I put in a reasonable effort.,1,Pauline Hanson,Kevin Rudd,1,0.00,0.00,0.00,0.00,0.00,0.00,0.00,L,L,Shorten,1,1,L1,0.50,0.28,0.950,0.050,1.000,1.000,0.967,0.900,1.000,1.000,1.000,1.000,0.900,0.700,0.50,1.00,0.93,-0.900,0.000,-0.067,23,Female,Online,TAFE or other non-university qualification
Shy,1,,1,Yes	I put in a reasonable effort.,1,Pauline Hanson,Kevin Rudd,1,0.00,0.00,0.00,0.00,0.00,0.00,0.00,L,L,Shorten,1,1,L1,0.50,0.28,0.750,0.500,0.800,0.500,0.707,0.673,0.700,0.700,0.820,0.720,0.600,0.600,0.63,0.65,0.69,-0.250,-0.300,-0.033,24,Female,Online,Some university, but no degree
Shy,1,No,1,Yes	I put in a reasonable effort.,1,Pauline Hanson,Kevin Rudd,1,0.00,0.00,0.00,0.00,0.00,0.00,0.00,L,L,Turnbull,0,1,L1,0.50,0.28,0.000,0.025,0.200,0.000,0.017,0.007,0.000,0.000,0.050,0.020,0.000,0.000,0.01,0.10,0.01,0.025,-0.200,-0.010,63,Male,Online,Did not graduate from high school
Shy,1,No,1,Yes	I put in a reasonable effort.,1,Pauline Hanson,Kevin Rudd,1,0.00,0.00,0.00,0.00,0.00,0.00,0.00,L,L,Turnbull,0,1,L1,0.50,0.28,0.175,0.000,0.100,1.000,0.000,0.033,0.000,0.000,0.000,0.000,0.000,0.100,0.09,0.55,0.02,-0.175,0.900,0.033,47,Female,Online,TAFE or other non-university qualification
Shy,1,,1,Yes	I put in a reasonable effort.,1,Pauline Hanson,Kevin Rudd,1,0.00,0.00,0.00,0.00,0.00,0.00,0.00,L,L,Turnbull,0,1,L1,0.50,0.28,0.650,0.000,0.900,1.000,0.837,0.123,1.000,0.000,0.810,0.070,0.700,0.300,0.33,0.95,0.48,-0.650,0.100,-0.713,21,Male,Online,Some university, but no degree
,1,,1,Yes	I put in a reasonable effort.,1,Pauline Hanson,Kevin Rudd,1,0.00,0.00,0.00,0.00,0.00,0.00,0.00,L,L,Turnbull,0,1,L1,0.50,0.28,0.625,0.000,0.600,1.000,0.167,0.117,0.100,0.000,0.200,0.250,0.200,0.100,0.31,0.80,0.14,-0.625,0.400,-0.050,21,Female,Lab,
Shy,1,,1,Yes	I put in a reasonable effort.,1,Pauline Hanson,Kevin Rudd,1,0.00,0.00,0.00,0.00,0.00,0.17,0.03,L,L,Shorten,1,1,L1,0.47,0.25,0.700,0.000,0.900,1.000,0.503,0.463,0.300,0.400,0.510,0.490,0.700,0.500,0.35,0.95,0.48,-0.700,0.100,-0.040,30,Male,Online,3-year university degree
Shy,1,,1,Yes	I put in a reasonable effort.,1,Pauline Hanson,Kevin Rudd,1,0.00,0.00,0.00,0.00,0.00,0.17,0.03,L,L,Turnbull,0,1,L1,0.47,0.25,0.300,0.125,0.500,0.000,0.067,0.033,0.000,0.000,0.000,0.000,0.200,0.100,0.21,0.25,0.05,-0.175,-0.500,-0.033,63,Male,Online,TAFE or other non-university qualification
Shy,1,No,1,Yes	I put in a reasonable effort.,1,Pauline Hanson,Kevin Rudd,1,0.00,0.00,0.00,0.25,0.00,0.17,0.07,L,L,Shorten,1,1,L1,0.43,0.21,0.750,0.475,0.800,0.800,0.770,0.670,0.800,0.700,0.810,0.810,0.700,0.500,0.61,0.80,0.72,-0.275,0.000,-0.100,18,Female,Online,High school graduate
Shy,1,No,1,Yes	I put in a reasonable effort.,1,Pauline Hanson,Kevin Rudd,1,0.00,0.00,0.00,0.25,0.00,0.17,0.07,L,L,Shorten,1,1,L1,0.43,0.21,0.500,0.000,0.800,1.000,0.483,0.417,0.300,0.400,0.450,0.450,0.700,0.400,0.25,0.90,0.45,-0.500,0.200,-0.067,37,Female,Online,TAFE or other non-university qualification
Shy,1,No,1,Yes	I put in a reasonable effort.,1,Pauline Hanson,Kevin Rudd,1,0.00,0.00,0.00,0.25,0.00,0.17,0.07,L,L,Shorten,1,1,L1,0.43,0.21,0.800,0.100,1.000,1.000,0.640,0.570,0.700,0.600,0.520,0.510,0.700,0.600,0.45,1.00,0.61,-0.700,0.000,-0.070,21,Male,Online,TAFE or other non-university qualification
Shy,1,No,1,Yes	I put in a reasonable effort.,1,Pauline Hanson,Kevin Rudd,1,0.00,0.00,0.00,0.25,0.00,0.17,0.07,L,L,Turnbull,0,1,L1,0.43,0.21,0.200,0.000,0.200,0.700,0.133,0.117,0.000,0.000,0.200,0.150,0.200,0.200,0.10,0.45,0.13,-0.200,0.500,-0.017,19,Male,Online,High school graduate
Shy,1,No,1,Yes	I put in a reasonable effort.,1,Pauline Hanson,Kevin Rudd,1,0.00,0.00,0.25,0.00,0.00,0.17,0.07,L,L,Turnbull,0,1,L1,0.43,0.21,0.225,0.125,0.300,0.700,0.270,0.173,0.000,0.000,0.310,0.220,0.500,0.300,0.18,0.50,0.22,-0.100,0.400,-0.097,23,Female,Online,4-year university degree
Shy,1,,1,Yes	I put in a reasonable effort.,1,Pauline Hanson,Kevin Rudd,1,0.00,0.00,0.00,0.00,0.00,0.50,0.08,L,L,Turnbull,0,1,L1,0.42,0.20,1.000,0.000,1.000,1.000,0.927,0.393,1.000,0.500,0.780,0.680,1.000,0.000,0.50,1.00,0.66,-1.000,0.000,-0.533,25,Male,Online,4-year university degree
Shy,1,No,1,Yes	I put in a reasonable effort.,1,Pauline Hanson,Kevin Rudd,1,0.00,0.00,0.00,0.25,0.00,0.33,0.10,L,L,Shorten,1,1,L1,0.40,0.18,0.750,0.225,0.700,1.000,0.890,0.843,1.000,1.000,0.870,0.830,0.800,0.700,0.49,0.85,0.87,-0.525,0.300,-0.047,69,Male,Online,TAFE or other non-university qualification
Shy,1,,1,Yes	I put in a reasonable effort.,1,Pauline Hanson,Kevin Rudd,1,0.00,0.00,0.00,0.50,0.00,0.17,0.11,L,L,Shorten,1,1,L1,0.39,0.17,0.275,0.400,0.800,0.900,0.903,0.807,1.000,0.800,0.910,0.820,0.800,0.800,0.34,0.85,0.86,0.125,0.100,-0.097,71,Male,Online,4-year university degree
Shy,1,,1,Yes	I put in a reasonable effort.,1,Pauline Hanson,Kevin Rudd,1,0.25,0.25,0.00,0.00,0.00,0.17,0.11,L,L,Shorten,1,1,L1,0.39,0.17,0.600,0.000,0.700,1.000,0.817,0.783,0.800,0.800,0.750,0.750,0.900,0.800,0.30,0.85,0.80,-0.600,0.300,-0.033,22,Female,Online,4-year university degree
Shy,1,,1,Yes	I put in a reasonable effort.,1,Pauline Hanson,Kevin Rudd,1,0.00,0.00,0.00,0.50,0.00,0.17,0.11,L,L,Shorten,1,1,L1,0.39,0.17,0.750,0.125,0.900,1.000,0.783,0.717,1.000,1.000,0.650,0.650,0.700,0.500,0.44,0.95,0.75,-0.625,0.100,-0.067,41,Male,Online,Postgraduate degree
,1,,1,Yes	I put in a reasonable effort.,1,Pauline Hanson,Kevin Rudd,1,0.00,0.00,0.25,0.25,0.00,0.17,0.11,L,L,Shorten,1,1,L1,0.39,0.17,0.775,0.000,0.900,0.900,0.703,0.250,0.700,0.200,0.610,0.250,0.800,0.300,0.39,0.90,0.48,-0.775,0.000,-0.453,22,Female,Lab,
,1,,1,Yes	I put in a reasonable effort.,1,Pauline Hanson,Kevin Rudd,1,0.00,0.00,0.25,0.25,0.00,0.17,0.11,L,L,Turnbull,0,1,L1,0.39,0.17,0.400,0.125,0.700,1.000,0.300,0.267,0.200,0.200,0.200,0.200,0.500,0.400,0.26,0.85,0.28,-0.275,0.300,-0.033,18,Female,Lab,
Shy,1,,1,Yes	I put in a reasonable effort.,1,Pauline Hanson,Kevin Rudd,1,0.00,0.00,0.50,0.25,0.00,0.00,0.13,L,L,Shorten,1,1,L1,0.38,0.16,0.525,0.000,0.800,1.000,0.833,0.300,1.000,0.400,0.800,0.300,0.700,0.200,0.26,0.90,0.57,-0.525,0.200,-0.533,27,Male,Online,Some university, but no degree
Comfortable,0,No,1,Yes	I put in a reasonable effort.,1,Pauline Hanson,Kevin Rudd,1,0.00,0.00,0.00,0.50,0.25,0.00,0.13,L,L,Turnbull,0,1,L1,0.38,0.16,0.300,0.300,0.000,0.000,0.137,0.070,0.100,0.000,0.310,0.210,0.000,0.000,0.30,0.00,0.10,0.000,0.000,-0.067,35,Female,Online,High school graduate
Shy,1,No,1,Yes	I put in a reasonable effort.,1,Pauline Hanson,Kevin Rudd,1,0.00,0.00,0.25,0.50,0.00,0.00,0.13,L,L,Turnbull,0,1,L1,0.38,0.16,0.550,0.000,0.300,1.000,0.677,0.117,0.700,0.100,0.530,0.050,0.800,0.200,0.28,0.65,0.40,-0.550,0.700,-0.560,52,Female,Online,Did not graduate from high school
Shy,1,,1,Yes	I put in a reasonable effort.,1,Pauline Hanson,Gareth Evans,0,0.25,0.00,0.00,0.25,0.25,0.17,0.15,L,L,Shorten,1,1,L1,0.35,0.13,0.400,0.000,0.800,1.000,0.783,0.650,1.000,1.000,0.650,0.650,0.700,0.300,0.20,0.90,0.72,-0.400,0.200,-0.133,30,Male,Online,Some university, but no degree
Shy,1,No,1,Yes	I put in a reasonable effort.,1,Pauline Hanson,Kevin Rudd,1,0.00,0.25,0.50,0.00,0.00,0.17,0.15,L,L,Shorten,1,1,L1,0.35,0.13,0.675,0.275,0.900,1.000,0.800,0.767,0.800,0.800,0.800,0.800,0.800,0.700,0.48,0.95,0.78,-0.400,0.100,-0.033,63,Male,Online,Some university, but no degree
Shy,1,,1,Yes	I put in a reasonable effort.,1,Pauline Hanson,Kevin Rudd,1,0.00,0.00,0.75,0.00,0.00,0.17,0.15,L,L,Shorten,1,1,L1,0.35,0.13,0.625,0.250,0.900,1.000,0.543,0.543,0.700,0.700,0.330,0.330,0.600,0.600,0.44,0.95,0.54,-0.375,0.100,0.000,33,Male,Online,TAFE or other non-university qualification
,1,,1,Yes	I put in a reasonable effort.,1,Pauline Hanson,Kevin Rudd,1,0.00,0.25,0.25,0.25,0.00,0.17,0.15,L,L,Shorten,1,1,L1,0.35,0.13,0.850,0.150,0.700,1.000,0.890,0.640,0.900,0.600,0.870,0.720,0.900,0.600,0.50,0.85,0.77,-0.700,0.300,-0.250,19,Female,Lab,
Shy,1,,1,Yes	I put in a reasonable effort.,1,Pauline Hanson,Kevin Rudd,1,0.25,0.00,0.00,0.25,0.25,0.17,0.15,L,L,Turnbull,0,1,L1,0.35,0.13,0.150,0.000,0.200,1.000,0.187,0.177,0.000,0.000,0.160,0.230,0.400,0.300,0.08,0.60,0.18,-0.150,0.800,-0.010,30,Female,Online,TAFE or other non-university qualification
Curious,0,,1,Yes	I put in a reasonable effort.,1,Pauline Hanson,Kevin Rudd,1,0.00,0.25,0.25,0.50,0.00,0.00,0.17,L,L,Shorten,1,1,L1,0.33,0.11,0.450,0.500,0.600,1.000,0.673,0.633,0.700,0.700,0.720,0.700,0.600,0.500,0.48,0.80,0.65,0.050,0.400,-0.040,25,Female,Online,3-year university degree
Shy,1,No,1,Yes	I put in a reasonable effort.,1,Pauline Hanson,Kevin Rudd,1,0.25,0.00,0.00,0.25,0.00,0.50,0.17,L,L,Shorten,1,1,L1,0.33,0.11,0.750,0.000,0.300,1.000,0.073,0.070,0.000,0.000,0.120,0.110,0.100,0.100,0.38,0.65,0.07,-0.750,0.700,-0.003,50,Female,Online,Some university, but no degree
Shy,1,No,1,Yes	I put in a reasonable effort.,1,Pauline Hanson,Kevin Rudd,1,0.25,0.00,0.25,0.25,0.25,0.17,0.19,L,L,Shorten,1,1,L1,0.31,0.09,0.600,0.000,0.600,1.000,0.600,0.700,0.500,0.700,0.700,0.700,0.600,0.700,0.30,0.80,0.65,-0.600,0.400,0.100,50,Female,Online,TAFE or other non-university qualification
Shy,1,,1,Yes	I put in a reasonable effort.,1,Pauline Hanson,Kevin Rudd,1,0.25,0.25,0.25,0.25,0.00,0.17,0.19,L,L,Shorten,1,1,L1,0.31,0.09,0.500,0.000,0.600,1.000,0.600,0.600,0.600,0.600,0.600,0.600,0.600,0.600,0.25,0.80,0.60,-0.500,0.400,0.000,18,Male,Online,Some university, but no degree
Shy,1,,1,Yes	I put in a reasonable effort.,1,Pauline Hanson,Kevin Rudd,1,0.25,0.25,0.25,0.25,0.00,0.17,0.19,L,L,Shorten,1,1,L1,0.31,0.09,0.650,0.000,0.800,1.000,0.620,0.607,0.600,0.600,0.660,0.620,0.600,0.600,0.33,0.90,0.61,-0.650,0.200,-0.013,28,Female,Online,Some university, but no degree
,1,,1,Yes	I put in a reasonable effort.,1,Pauline Hanson,Kevin Rudd,1,0.00,0.00,0.25,0.50,0.25,0.17,0.19,L,L,Shorten,1,1,L1,0.31,0.09,0.575,0.000,0.500,1.000,0.383,0.267,0.400,0.300,0.450,0.300,0.300,0.200,0.29,0.75,0.33,-0.575,0.500,-0.117,20,Female,Lab,
Shy,1,No,1,Yes	I put in a reasonable effort.,1,Pauline Hanson,Kevin Rudd,1,0.25,0.00,0.75,0.00,0.00,0.17,0.19,L,L,Turnbull,0,1,L1,0.31,0.09,0.225,0.000,0.200,1.000,0.130,0.050,0.100,0.000,0.090,0.050,0.200,0.100,0.11,0.60,0.09,-0.225,0.800,-0.080,58,Female,Online,TAFE or other non-university qualification
Shy,1,,1,Yes	I put in a reasonable effort.,1,Pauline Hanson,Kevin Rudd,1,0.25,0.00,0.00,0.75,0.00,0.17,0.19,L,L,Turnbull,0,1,L1,0.31,0.09,0.175,0.300,0.600,1.000,0.233,0.093,0.000,0.000,0.100,0.080,0.600,0.200,0.24,0.80,0.16,0.125,0.400,-0.140,,Male,Online,3-year university degree
,1,,1,Yes	I put in a reasonable effort.,1,Pauline Hanson,Kevin Rudd,1,0.25,0.00,0.25,0.50,0.00,0.17,0.19,L,L,Turnbull,0,1,L1,0.31,0.09,0.350,0.100,0.600,0.800,0.230,0.177,0.200,0.100,0.190,0.130,0.300,0.300,0.23,0.70,0.20,-0.250,0.200,-0.053,19,Female,Lab,
,1,,1,Yes	I put in a reasonable effort.,1,Pauline Hanson,Kevin Rudd,1,0.00,0.25,0.25,0.25,0.25,0.17,0.19,L,L,Turnbull,0,1,L1,0.31,0.09,0.375,0.375,0.700,0.800,0.350,0.300,0.300,0.200,0.350,0.300,0.400,0.400,0.38,0.75,0.33,0.000,0.100,-0.050,20,Male,Lab,
,1,,1,Yes	I put in a reasonable effort.,1,Pauline Hanson,Kevin Rudd,1,0.00,1.00,0.00,0.00,0.00,0.17,0.19,L,L,Turnbull,0,1,L1,0.31,0.09,0.500,0.250,0.000,0.000,0.083,0.143,0.000,0.200,0.050,0.030,0.200,0.200,0.38,0.00,0.11,-0.250,0.000,0.060,19,Female,Lab,
Shy,1,,1,Yes	I put in a reasonable effort.,1,Pauline Hanson,Kevin Rudd,1,0.25,0.25,0.25,0.50,0.00,0.00,0.21,L,L,Shorten,1,1,L1,0.29,0.07,0.425,0.275,0.500,0.600,0.600,0.567,0.700,0.600,0.600,0.600,0.500,0.500,0.35,0.55,0.58,-0.150,0.100,-0.033,22,Female,Online,Some university, but no degree
Shy,1,No,1,Yes	I put in a reasonable effort.,1,Pauline Hanson,Kevin Rudd,1,0.00,0.00,0.25,0.25,0.25,0.50,0.21,L,L,Turnbull,0,1,L1,0.29,0.07,0.450,0.375,0.400,0.700,0.190,0.360,0.100,0.200,0.170,0.180,0.300,0.700,0.41,0.55,0.28,-0.075,0.300,0.170,59,Female,Online,High school graduate
Curious,0,,1,Yes	I put in a reasonable effort.,1,Pauline Hanson,Kevin Rudd,1,0.50,0.00,0.00,0.50,0.00,0.33,0.22,L,L,Shorten,1,1,L1,0.28,0.06,0.425,0.300,0.300,0.800,0.277,0.280,0.400,0.300,0.230,0.240,0.200,0.300,0.36,0.55,0.28,-0.125,0.500,0.003,19,Male,Online,High school graduate
Shy,1,No,1,Yes	I put in a reasonable effort.,1,Pauline Hanson,Kevin Rudd,1,0.25,0.00,0.00,0.50,0.25,0.33,0.22,L,L,Shorten,1,1,L1,0.28,0.06,0.500,0.450,0.600,0.700,0.597,0.540,0.500,0.500,0.690,0.520,0.600,0.600,0.48,0.65,0.57,-0.050,0.100,-0.057,65,Male,Online,TAFE or other non-university qualification
Shy,1,,1,Yes	I put in a reasonable effort.,1,Pauline Hanson,Kevin Rudd,1,0.25,0.00,0.25,0.25,0.25,0.33,0.22,L,L,Shorten,1,1,L1,0.28,0.06,0.500,0.175,0.600,0.900,0.500,0.400,0.300,0.200,0.400,0.300,0.800,0.700,0.34,0.75,0.45,-0.325,0.300,-0.100,21,Male,Online,3-year university degree
Shy,1,No,1,Yes	I put in a reasonable effort.,1,Pauline Hanson,Kevin Rudd,1,0.25,0.00,0.25,0.25,0.25,0.33,0.22,L,L,Turnbull,0,1,L1,0.28,0.06,0.125,0.000,0.800,1.000,0.197,0.130,0.000,0.000,0.090,0.090,0.500,0.300,0.06,0.90,0.16,-0.125,0.200,-0.067,66,Female,Online,Some university, but no degree
,1,,1,Yes	I put in a reasonable effort.,1,Malcolm Fraser,Kevin Rudd,0,0.25,0.25,0.25,0.25,0.25,0.17,0.24,L,L,Shorten,1,1,L1,0.26,0.05,0.675,0.275,0.700,0.300,0.637,0.400,0.600,0.300,0.710,0.600,0.600,0.300,0.48,0.50,0.52,-0.400,-0.400,-0.237,21,Female,Lab,
Shy,1,No,1,Yes	I put in a reasonable effort.,1,Pauline Hanson,Kevin Rudd,1,0.00,1.00,0.00,0.25,0.00,0.17,0.24,L,L,Shorten,1,1,L1,0.26,0.05,0.600,0.150,0.800,1.000,0.853,0.820,1.000,1.000,0.760,0.760,0.800,0.700,0.38,0.90,0.84,-0.450,0.200,-0.033,65,Male,Online,TAFE or other non-university qualification
,1,,1,Yes	I put in a reasonable effort.,1,Pauline Hanson,Kevin Rudd,1,0.00,0.00,0.25,0.00,1.00,0.17,0.24,L,L,Shorten,1,1,L1,0.26,0.05,0.750,0.525,0.800,1.000,0.750,0.733,0.700,0.800,0.650,0.700,0.900,0.700,0.64,0.90,0.74,-0.225,0.200,-0.017,18,Female,Lab,
Shy,1,,1,Yes	I put in a reasonable effort.,1,Pauline Hanson,Kevin Rudd,1,0.25,0.00,0.75,0.25,0.00,0.17,0.24,L,L,Turnbull,0,1,L1,0.26,0.05,0.500,0.200,0.800,0.900,0.570,0.350,0.400,0.300,0.710,0.350,0.600,0.400,0.35,0.85,0.46,-0.300,0.100,-0.220,23,Female,Online,Some university, but no degree
,1,,1,Yes	I put in a reasonable effort.,1,Pauline Hanson,Kevin Rudd,1,0.00,0.00,0.25,0.50,0.25,0.50,0.25,L,L,Shorten,1,1,L1,0.25,0.03,0.675,0.000,0.600,1.000,0.537,0.367,0.500,0.400,0.610,0.500,0.500,0.200,0.34,0.80,0.45,-0.675,0.400,-0.170,20,Female,Lab,
Shy,1,No,1,Yes	I put in a reasonable effort.,1,Pauline Hanson,Kevin Rudd,1,0.25,0.25,0.25,0.25,0.25,0.33,0.26,L,L,Shorten,1,1,L1,0.24,0.02,0.550,0.200,0.600,0.900,0.633,0.667,0.700,0.700,0.500,0.700,0.700,0.600,0.38,0.75,0.65,-0.350,0.300,0.033,36,Female,Online,High school graduate
Shy,1,No,1,Yes	I put in a reasonable effort.,1,Pauline Hanson,Kevin Rudd,1,0.00,0.00,0.50,0.50,0.25,0.33,0.26,L,L,Shorten,1,1,L1,0.24,0.02,0.775,0.000,0.800,1.000,0.700,0.630,0.800,0.700,0.600,0.590,0.700,0.600,0.39,0.90,0.67,-0.775,0.200,-0.070,32,Male,Online,TAFE or other non-university qualification
,1,,1,Yes	I put in a reasonable effort.,1,Pauline Hanson,Kevin Rudd,1,0.00,0.25,0.25,0.50,0.25,0.33,0.26,L,L,Shorten,1,1,L1,0.24,0.02,0.500,0.100,0.600,0.900,0.840,0.463,0.800,0.500,0.920,0.490,0.800,0.400,0.30,0.75,0.65,-0.400,0.300,-0.377,32,Female,Lab,
Shy,1,No,1,Yes	I put in a reasonable effort.,1,Pauline Hanson,Kevin Rudd,1,0.25,0.25,0.25,0.50,0.25,0.17,0.28,L,L,Shorten,1,1,L1,0.22,0.00,0.500,0.350,0.700,0.800,0.667,0.600,0.700,0.600,0.700,0.600,0.600,0.600,0.43,0.75,0.63,-0.150,0.100,-0.067,23,Female,Online,Some university, but no degree
Shy,1,,1,Yes	I put in a reasonable effort.,1,Pauline Hanson,Kevin Rudd,1,0.25,0.50,0.25,0.25,0.25,0.17,0.28,L,L,Shorten,1,1,L1,0.22,0.00,0.500,0.050,0.600,0.800,0.670,0.603,0.800,0.800,0.510,0.510,0.700,0.500,0.28,0.70,0.64,-0.450,0.200,-0.067,57,Female,Online,High school graduate
,1,,1,Yes	I put in a reasonable effort.,1,Pauline Hanson,Kevin Rudd,1,0.25,0.25,0.75,0.25,0.00,0.17,0.28,L,L,Shorten,1,1,L1,0.22,0.00,0.525,0.150,0.700,1.000,0.677,0.577,0.700,0.600,0.730,0.730,0.600,0.400,0.34,0.85,0.63,-0.375,0.300,-0.100,18,Female,Lab,
Shy,1,No,1,Yes	I put in a reasonable effort.,1,Pauline Hanson,Kevin Rudd,1,0.25,0.25,0.25,0.50,0.25,0.17,0.28,L,L,Turnbull,0,1,L1,0.22,0.00,0.275,0.750,1.000,0.500,0.670,0.503,0.700,0.500,0.610,0.510,0.700,0.500,0.51,0.75,0.59,0.475,-0.500,-0.167,39,Female,Online,High school graduate
Shy,1,No,1,Yes	I put in a reasonable effort.,1,Pauline Hanson,Kevin Rudd,1,0.25,0.25,0.25,0.50,0.25,0.17,0.28,L,L,Turnbull,0,1,L1,0.22,0.00,0.425,0.000,0.500,1.000,0.097,0.087,0.000,0.000,0.090,0.060,0.200,0.200,0.21,0.75,0.09,-0.425,0.500,-0.010,20,Female,Online,Some university, but no degree
Comfortable,0,,1,Yes	I put in a reasonable effort.,1,Pauline Hanson,Kevin Rudd,1,0.25,0.00,0.00,0.50,0.50,0.50,0.29,L,L,Shorten,1,1,L1,0.21,-0.01,0.400,0.200,0.800,0.400,0.267,0.190,0.300,0.300,0.200,0.170,0.300,0.100,0.30,0.60,0.23,-0.200,-0.400,-0.077,49,Male,Online,TAFE or other non-university qualification
Shy,1,,1,Maybe	I was somewhat distracted.,1,Pauline Hanson,Corey Bernardi,0,0.00,0.00,0.50,0.50,0.50,0.33,0.31,L,L,Shorten,1,1,L1,0.19,-0.02,0.525,0.800,0.400,0.400,0.440,0.533,0.500,0.500,0.420,0.500,0.400,0.600,0.66,0.40,0.49,0.275,0.000,0.093,20,Male,Online,High school graduate
Shy,1,No,1,Yes	I put in a reasonable effort.,1,Pauline Hanson,Kevin Rudd,1,0.25,0.25,0.25,0.50,0.25,0.33,0.31,L,L,Shorten,1,1,L1,0.19,-0.02,0.625,0.475,0.500,0.500,0.670,0.570,0.800,0.600,0.610,0.610,0.600,0.500,0.55,0.50,0.62,-0.150,0.000,-0.100,64,Male,Online,TAFE or other non-university qualification
Shy,1,,1,Maybe	I was somewhat distracted.,1,Pauline Hanson,Kevin Rudd,1,0.25,0.25,0.25,0.50,0.25,0.33,0.31,L,L,Turnbull,0,1,L1,0.19,-0.02,0.575,0.525,0.300,0.200,0.553,0.600,0.500,0.500,0.560,0.600,0.600,0.700,0.55,0.25,0.58,-0.050,-0.100,0.047,36,Female,Online,Postgraduate degree
Shy,1,No,1,Yes	I put in a reasonable effort.,1,Pauline Hanson,Kevin Rudd,1,0.25,0.25,0.50,0.25,0.25,0.33,0.31,L,L,Turnbull,0,1,L1,0.19,-0.02,0.175,0.025,0.200,0.800,0.127,0.133,0.100,0.100,0.080,0.100,0.200,0.200,0.10,0.50,0.13,-0.150,0.600,0.007,52,Male,Online,High school graduate
Shy,1,No,1,Yes	I put in a reasonable effort.,1,Pauline Hanson,Kevin Rudd,1,0.25,0.25,0.25,0.50,0.25,0.33,0.31,L,L,Turnbull,0,1,L1,0.19,-0.02,0.300,0.500,0.900,0.900,0.000,0.007,0.000,0.000,0.000,0.020,0.000,0.000,0.40,0.90,0.00,0.200,0.000,0.007,57,Male,Online,High school graduate
Shy,1,,1,Yes	I put in a reasonable effort.,1,Pauline Hanson,Kevin Rudd,1,0.50,0.25,0.25,0.25,0.25,0.33,0.31,L,L,Turnbull,0,1,L1,0.19,-0.02,0.675,0.250,0.900,0.800,0.270,0.270,0.300,0.300,0.210,0.210,0.300,0.300,0.46,0.85,0.27,-0.425,-0.100,0.000,33,Female,Online,TAFE or other non-university qualification
,1,,1,Yes	I put in a reasonable effort.,1,Pauline Hanson,Kevin Rudd,1,0.25,0.00,0.50,0.50,0.25,0.33,0.31,L,L,Turnbull,0,1,L1,0.19,-0.02,0.475,0.000,0.700,1.000,0.587,0.263,0.500,0.200,0.660,0.290,0.600,0.300,0.24,0.85,0.43,-0.475,0.300,-0.323,19,Female,Lab,
Shy,1,,1,Yes	I put in a reasonable effort.,1,Pauline Hanson,Kevin Rudd,1,0.25,0.25,0.75,0.50,0.00,0.17,0.32,L,L,Shorten,1,1,L1,0.18,-0.04,0.400,0.275,0.600,0.700,0.447,0.397,0.300,0.300,0.440,0.390,0.600,0.500,0.34,0.65,0.42,-0.125,0.100,-0.050,28,Female,Online,3-year university degree
,1,,1,Yes	I put in a reasonable effort.,1,Pauline Hanson,Kevin Rudd,1,0.25,0.25,0.50,0.50,0.25,0.17,0.32,L,L,Shorten,1,1,L1,0.18,-0.04,0.475,0.275,0.400,0.800,0.483,0.367,0.500,0.300,0.450,0.400,0.500,0.400,0.38,0.60,0.43,-0.200,0.400,-0.117,18,Male,Lab,
Shy,1,,1,Yes	I put in a reasonable effort.,1,Peter Dutton,Julie Bishop,0,0.25,0.25,0.75,0.25,0.25,0.17,0.32,L,L,Turnbull,0,1,L1,0.18,-0.04,0.250,0.050,0.600,0.800,0.467,0.227,0.400,0.200,0.300,0.180,0.700,0.300,0.15,0.70,0.35,-0.200,0.200,-0.240,40,Female,Online,Postgraduate degree
Shy,1,No,1,Yes	I put in a reasonable effort.,1,Pauline Hanson,Kevin Rudd,1,0.25,0.25,1.00,0.00,0.25,0.17,0.32,L,L,Turnbull,0,1,L1,0.18,-0.04,0.150,0.000,0.300,0.000,0.367,0.193,0.500,0.000,0.300,0.280,0.300,0.300,0.08,0.15,0.28,-0.150,-0.300,-0.173,54,Male,Online,4-year university degree
Shy,1,,1,Yes	I put in a reasonable effort.,1,Pauline Hanson,Kevin Rudd,1,0.25,0.25,0.50,0.50,0.25,0.17,0.32,L,L,Turnbull,0,1,L1,0.18,-0.04,0.500,0.000,0.500,1.000,0.617,0.177,0.600,0.200,0.650,0.130,0.600,0.200,0.25,0.75,0.40,-0.500,0.500,-0.440,25,Female,Online,4-year university degree
,1,,1,Yes	I put in a reasonable effort.,1,Pauline Hanson,Kevin Rudd,1,0.25,0.25,0.50,0.50,0.25,0.17,0.32,L,L,Turnbull,0,1,L1,0.18,-0.04,0.500,0.050,0.700,1.000,0.563,0.290,0.500,0.300,0.590,0.370,0.600,0.200,0.28,0.85,0.43,-0.450,0.300,-0.273,20,Female,Lab,
Shy,1,No,1,Yes	I put in a reasonable effort.,1,Pauline Hanson,Kevin Rudd,1,0.25,0.25,0.25,0.50,0.25,0.50,0.33,L,L,Shorten,1,1,L1,0.17,-0.05,0.400,0.250,0.400,0.900,0.473,0.303,0.400,0.200,0.620,0.410,0.400,0.300,0.33,0.65,0.39,-0.150,0.500,-0.170,47,Female,Online,High school graduate
Shy,1,No,1,Yes	I put in a reasonable effort.,1,Pauline Hanson,Kevin Rudd,1,0.00,0.50,0.25,0.50,0.50,0.33,0.35,L,L,Shorten,1,1,L1,0.15,-0.07,0.775,0.150,0.800,1.000,0.667,0.230,0.700,0.300,0.700,0.190,0.600,0.200,0.46,0.90,0.45,-0.625,0.200,-0.437,27,Male,Online,4-year university degree
,1,,1,Yes	I put in a reasonable effort.,1,Pauline Hanson,Kevin Rudd,1,0.25,0.25,0.75,0.25,0.25,0.33,0.35,L,L,Shorten,1,1,L1,0.15,-0.07,0.525,0.000,0.700,1.000,0.567,0.467,0.700,0.600,0.500,0.500,0.500,0.300,0.26,0.85,0.52,-0.525,0.300,-0.100,17,Male,Lab,
,1,,1,Yes	I put in a reasonable effort.,1,Peter Dutton,Kevin Rudd,0,0.50,0.25,0.25,0.50,0.25,0.33,0.35,L,L,Turnbull,0,1,L1,0.15,-0.07,0.400,0.250,0.400,0.700,0.133,0.077,0.000,0.000,0.100,0.030,0.300,0.200,0.33,0.55,0.11,-0.150,0.300,-0.057,23,Female,Lab,
None of the above,0,,1,Yes	I put in a reasonable effort.,1,Pauline Hanson,Kevin Rudd,1,0.25,0.25,0.75,0.50,0.00,0.33,0.35,L,L,Turnbull,0,1,L1,0.15,-0.07,0.500,0.325,0.600,0.700,0.273,0.377,0.200,0.400,0.220,0.230,0.400,0.500,0.41,0.65,0.33,-0.175,0.100,0.103,19,Male,Online,High school graduate
Shy,1,,1,Maybe	I was somewhat distracted.,1,Pauline Hanson,Kevin Rudd,1,0.25,0.25,0.50,0.50,0.25,0.33,0.35,L,L,Turnbull,0,1,L1,0.15,-0.07,0.500,0.175,0.400,1.000,0.503,0.463,0.500,0.500,0.510,0.490,0.500,0.400,0.34,0.70,0.48,-0.325,0.600,-0.040,23,Male,Online,Postgraduate degree
Shy,1,No,1,Yes	I put in a reasonable effort.,1,Pauline Hanson,Kevin Rudd,1,0.25,0.25,0.50,0.50,0.25,0.33,0.35,L,L,Turnbull,0,1,L1,0.15,-0.07,0.475,0.325,0.700,0.800,0.333,0.293,0.200,0.300,0.300,0.280,0.500,0.300,0.40,0.75,0.31,-0.150,0.100,-0.040,30,Male,Online,Postgraduate degree
Shy,1,,1,Yes	I put in a reasonable effort.,1,Pauline Hanson,Kevin Rudd,1,0.25,0.25,0.75,0.25,0.25,0.33,0.35,L,L,Turnbull,0,1,L1,0.15,-0.07,0.375,0.075,0.300,0.900,0.167,0.160,0.100,0.100,0.200,0.180,0.200,0.200,0.23,0.60,0.16,-0.300,0.600,-0.007,28,Male,Online,4-year university degree
Shy,1,,1,Yes	I put in a reasonable effort.,1,Pauline Hanson,Kevin Rudd,1,0.25,0.25,0.75,0.25,0.25,0.33,0.35,L,L,Turnbull,0,1,L1,0.15,-0.07,0.425,0.125,0.700,0.900,0.500,0.347,0.400,0.400,0.400,0.340,0.700,0.300,0.28,0.80,0.42,-0.300,0.200,-0.153,26,Male,Online,Postgraduate degree
Shy,1,,1,Yes	I put in a reasonable effort.,1,Pauline Hanson,Kevin Rudd,1,0.25,0.25,0.25,0.25,0.50,0.67,0.36,L,L,Shorten,1,1,L1,0.14,-0.08,0.650,0.475,0.700,0.800,0.600,0.520,0.600,0.500,0.600,0.560,0.600,0.500,0.56,0.75,0.56,-0.175,0.100,-0.080,20,Male,Online,Some university, but no degree
Confused,0,,1,Yes	I put in a reasonable effort.,1,Pauline Hanson,Kevin Rudd,1,0.25,0.25,0.75,0.50,0.25,0.17,0.36,L,L,Turnbull,0,1,L1,0.14,-0.08,0.475,0.025,0.200,0.000,0.387,0.213,0.400,0.200,0.360,0.240,0.400,0.200,0.25,0.10,0.30,-0.450,-0.200,-0.173,27,Female,Online,High school graduate
Shy,1,,1,Yes	I put in a reasonable effort.,1,Pauline Hanson,Kevin Rudd,1,0.25,0.25,0.75,0.50,0.25,0.17,0.36,L,L,Turnbull,0,1,L1,0.14,-0.08,0.475,0.000,0.400,1.000,0.437,0.397,0.400,0.300,0.410,0.590,0.500,0.300,0.24,0.70,0.42,-0.475,0.600,-0.040,19,Male,Online,High school graduate
,1,,1,Yes	I put in a reasonable effort.,1,Pauline Hanson,Kevin Rudd,1,0.25,0.50,0.75,0.25,0.25,0.17,0.36,L,L,Turnbull,0,1,L1,0.14,-0.08,0.850,0.300,0.400,0.900,0.720,0.677,0.700,0.700,0.760,0.730,0.700,0.600,0.58,0.65,0.70,-0.550,0.500,-0.043,39,Female,Lab,
,1,,1,Yes	I put in a reasonable effort.,1,Pauline Hanson,Julie Bishop,0,0.50,0.25,0.25,0.50,0.25,0.50,0.38,L,L,Shorten,1,1,L1,0.13,-0.09,0.475,0.300,0.500,0.600,0.500,0.367,0.500,0.300,0.500,0.400,0.500,0.400,0.39,0.55,0.43,-0.175,0.100,-0.133,18,Female,Lab,
Shy,1,,1,Maybe	I was somewhat distracted.,1,Pauline Hanson,Kevin Rudd,1,0.25,0.50,0.25,0.50,0.25,0.50,0.38,L,L,Shorten,1,1,L1,0.13,-0.09,0.600,0.225,0.700,1.000,0.590,0.443,0.500,0.400,0.670,0.430,0.600,0.500,0.41,0.85,0.52,-0.375,0.300,-0.147,18,Male,Online,High school graduate
Shy,1,No,1,Yes	I put in a reasonable effort.,1,Pauline Hanson,Kevin Rudd,1,0.25,0.25,0.75,0.25,0.25,0.50,0.38,L,L,Shorten,1,1,L1,0.13,-0.09,0.400,0.000,0.500,1.000,0.637,0.333,0.800,0.400,0.610,0.400,0.500,0.200,0.20,0.75,0.49,-0.400,0.500,-0.303,69,Female,Online,TAFE or other non-university qualification
Happy,0,,1,Maybe	I was somewhat distracted.,1,Tony Abbott,Anthony Albanese,0,0.25,0.25,0.25,0.25,0.25,1.00,0.38,L,L,Turnbull,0,1,L1,0.13,-0.09,0.550,0.625,0.300,0.400,0.630,0.763,0.500,0.800,0.690,0.690,0.700,0.800,0.59,0.35,0.70,0.075,0.100,0.133,36,Male,Online,High school graduate
Shy,1,No,1,Yes	I put in a reasonable effort.,1,Pauline Hanson,Kevin Rudd,1,0.25,0.00,0.75,0.50,0.25,0.50,0.38,L,L,Turnbull,0,1,L1,0.13,-0.09,0.350,0.025,0.500,1.000,0.200,0.060,0.100,0.000,0.200,0.080,0.300,0.100,0.19,0.75,0.13,-0.325,0.500,-0.140,75,Male,Online,High school graduate
Shy,1,No,1,Yes	I put in a reasonable effort.,1,Pauline Hanson,Kevin Rudd,1,0.25,0.25,0.50,0.50,0.25,0.50,0.38,L,L,Turnbull,0,1,L1,0.13,-0.09,0.625,0.150,0.600,1.000,0.530,0.363,0.500,0.300,0.590,0.290,0.500,0.500,0.39,0.80,0.45,-0.475,0.400,-0.167,75,Male,Online,High school graduate
Shy,1,No,1,Yes	I put in a reasonable effort.,1,Pauline Hanson,Kevin Rudd,1,0.25,0.25,0.50,0.50,0.25,0.50,0.38,L,L,Turnbull,0,1,L1,0.13,-0.09,0.650,0.225,0.600,0.800,0.330,0.097,0.300,0.000,0.290,0.090,0.400,0.200,0.44,0.70,0.21,-0.425,0.200,-0.233,54,Male,Online,High school graduate
Shy,1,,1,Yes	I put in a reasonable effort.,1,Pauline Hanson,Kevin Rudd,1,0.75,0.00,0.25,0.50,0.25,0.50,0.38,L,L,Turnbull,0,1,L1,0.13,-0.09,0.275,0.100,0.200,0.600,0.117,0.047,0.000,0.000,0.050,0.040,0.300,0.100,0.19,0.40,0.08,-0.175,0.400,-0.070,25,Male,Online,TAFE or other non-university qualification
Shy,1,No,1,Yes	I put in a reasonable effort.,1,Pauline Hanson,Kevin Rudd,1,0.50,0.50,0.00,0.75,0.25,0.33,0.39,L,L,Shorten,1,1,L1,0.11,-0.11,0.275,0.000,0.200,0.400,0.063,0.067,0.000,0.000,0.090,0.100,0.100,0.100,0.14,0.30,0.07,-0.275,0.200,0.003,59,Female,Online,TAFE or other non-university qualification
Shy,1,,1,Yes	I put in a reasonable effort.,1,Pauline Hanson,Julie Bishop,0,0.25,0.25,0.25,0.50,0.25,0.83,0.39,L,L,Turnbull,0,1,L1,0.11,-0.11,0.475,1.000,0.600,1.000,0.767,0.933,0.500,1.000,1.000,1.000,0.800,0.800,0.74,0.80,0.85,0.525,0.400,0.167,71,Female,Online,Some university, but no degree
,1,,1,Yes	I put in a reasonable effort.,1,Pauline Hanson,Kevin Rudd,1,0.25,0.25,0.50,0.75,0.25,0.33,0.39,L,L,Turnbull,0,1,L1,0.11,-0.11,0.450,0.000,0.200,1.000,0.300,0.033,0.100,0.000,0.400,0.000,0.400,0.100,0.23,0.60,0.17,-0.450,0.800,-0.267,19,Female,Lab,
Satisfied,0,,1,Yes	I put in a reasonable effort.,1,Pauline Hanson,Kevin Rudd,1,0.25,0.75,0.00,0.50,0.25,0.67,0.40,L,L,Shorten,1,1,L1,0.10,-0.12,0.700,0.650,0.700,0.600,0.750,0.740,0.800,0.700,0.750,0.720,0.700,0.800,0.68,0.65,0.75,-0.050,-0.100,-0.010,38,Male,Online,Postgraduate degree
Shy,1,No,1,Yes	I put in a reasonable effort.,1,Pauline Hanson,Kevin Rudd,1,0.25,0.50,0.75,0.50,0.25,0.17,0.40,L,L,Shorten,1,1,L1,0.10,-0.12,0.525,0.250,0.700,1.000,0.667,0.293,0.500,0.300,0.800,0.280,0.700,0.300,0.39,0.85,0.48,-0.275,0.300,-0.373,42,Male,Online,TAFE or other non-university qualification
Shy,1,,1,Yes	I put in a reasonable effort.,1,Pauline Hanson,Kevin Rudd,1,0.25,0.25,1.00,0.50,0.25,0.17,0.40,L,L,Turnbull,0,1,L1,0.10,-0.12,0.350,0.000,0.600,1.000,0.497,0.080,0.500,0.000,0.490,0.140,0.500,0.100,0.18,0.80,0.29,-0.350,0.400,-0.417,18,Female,Online,Some university, but no degree
Shy,1,,1,Yes	I put in a reasonable effort.,1,Pauline Hanson,Kevin Rudd,1,0.25,0.50,0.50,0.75,0.25,0.17,0.40,L,L,Turnbull,0,1,L1,0.10,-0.12,0.400,0.075,0.700,0.100,0.530,0.147,0.500,0.100,0.490,0.140,0.600,0.200,0.24,0.40,0.34,-0.325,-0.600,-0.383,22,Female,Online,Some university, but no degree
Shy,1,No,1,Yes	I put in a reasonable effort.,1,Pauline Hanson,Kevin Rudd,1,0.50,0.00,0.50,0.50,0.50,0.50,0.42,L,L,Shorten,1,1,L1,0.08,-0.14,0.250,0.100,0.200,0.600,0.133,0.147,0.200,0.100,0.100,0.140,0.100,0.200,0.18,0.40,0.14,-0.150,0.400,0.013,21,Female,Online,High school graduate
Shy,1,No,1,Yes	I put in a reasonable effort.,1,Pauline Hanson,Kevin Rudd,1,0.50,0.50,0.00,0.50,0.50,0.50,0.42,L,L,Shorten,1,1,L1,0.08,-0.14,0.425,0.000,0.600,1.000,0.167,0.067,0.000,0.000,0.000,0.000,0.500,0.200,0.21,0.80,0.12,-0.425,0.400,-0.100,54,Female,Online,TAFE or other non-university qualification
Shy,1,No,1,Yes	I put in a reasonable effort.,1,Pauline Hanson,Kevin Rudd,1,0.50,0.25,0.50,0.25,0.50,0.50,0.42,L,L,Shorten,1,1,L1,0.08,-0.14,0.500,0.450,0.500,0.500,0.533,0.500,0.500,0.500,0.500,0.500,0.600,0.500,0.48,0.50,0.52,-0.050,0.000,-0.033,52,Male,Online,3-year university degree
Shy,1,No,1,Yes	I put in a reasonable effort.,1,Pauline Hanson,Kevin Rudd,1,1.00,0.25,0.00,0.50,0.25,0.50,0.42,L,L,Turnbull,0,1,L1,0.08,-0.14,0.200,0.200,0.000,0.000,0.163,0.200,0.000,0.000,0.190,0.300,0.300,0.300,0.20,0.00,0.18,0.000,0.000,0.037,41,Male,Online,High school graduate
Shy,1,,1,Yes	I put in a reasonable effort.,1,Pauline Hanson,Kevin Rudd,1,0.25,0.25,0.75,0.50,0.25,0.50,0.42,L,L,Turnbull,0,1,L1,0.08,-0.14,0.400,0.050,0.500,0.500,0.483,0.363,0.700,0.500,0.450,0.390,0.300,0.200,0.23,0.50,0.42,-0.350,0.000,-0.120,19,Female,Online,High school graduate
Shy,1,No,1,Yes	I put in a reasonable effort.,1,Pauline Hanson,Kevin Rudd,1,0.25,0.75,0.75,0.25,0.25,0.33,0.43,L,R,Shorten,1,1,L1,0.07,-0.15,0.400,0.000,0.600,1.000,0.553,0.417,0.400,0.300,0.660,0.650,0.600,0.300,0.20,0.80,0.49,-0.400,0.400,-0.137,27,Male,Online,3-year university degree
Shy,1,No,1,Yes	I put in a reasonable effort.,1,Pauline Hanson,Kevin Rudd,1,0.50,0.75,0.50,0.25,0.25,0.33,0.43,L,R,Shorten,1,1,L1,0.07,-0.15,0.550,0.200,0.500,0.100,0.600,0.560,0.600,0.600,0.600,0.580,0.600,0.500,0.38,0.30,0.58,-0.350,-0.400,-0.040,27,Male,Online,3-year university degree
Shy,1,,1,Yes	I put in a reasonable effort.,1,Pauline Hanson,Kevin Rudd,1,0.50,0.50,0.50,0.50,0.25,0.33,0.43,L,R,Shorten,1,1,L1,0.07,-0.15,0.600,0.000,0.500,1.000,0.433,0.227,0.500,0.300,0.400,0.180,0.400,0.200,0.30,0.75,0.33,-0.600,0.500,-0.207,42,Female,Online,Some university, but no degree
,1,,1,Yes	I put in a reasonable effort.,1,Pauline Hanson,Kevin Rudd,1,0.25,0.50,1.00,0.25,0.25,0.33,0.43,L,R,Shorten,1,1,L1,0.07,-0.15,0.375,0.075,0.600,0.900,0.600,0.400,0.600,0.400,0.600,0.400,0.600,0.400,0.23,0.75,0.50,-0.300,0.300,-0.200,19,Female,Lab,
,1,,1,Yes	I put in a reasonable effort.,1,Pauline Hanson,Kevin Rudd,1,0.25,0.25,1.00,0.50,0.25,0.33,0.43,L,R,Shorten,1,1,L1,0.07,-0.15,0.525,0.000,0.400,1.000,0.557,0.333,0.500,0.300,0.570,0.400,0.600,0.300,0.26,0.70,0.45,-0.525,0.600,-0.223,19,Female,Lab,
,1,,1,Yes	I put in a reasonable effort.,1,Peter Dutton,Julie Bishop,0,0.50,0.25,0.75,0.50,0.25,0.33,0.43,L,R,Turnbull,0,1,L1,0.07,-0.15,0.425,0.000,0.200,1.000,0.480,0.403,0.400,0.300,0.440,0.410,0.600,0.500,0.21,0.60,0.44,-0.425,0.800,-0.077,18,Female,Lab,
Shy,1,No,1,Yes	I put in a reasonable effort.,1,Pauline Hanson,Kevin Rudd,1,0.00,0.75,0.25,0.75,0.00,0.83,0.43,L,R,Turnbull,0,1,L1,0.07,-0.15,0.725,0.050,0.900,0.200,0.800,0.700,0.700,1.000,1.000,0.700,0.700,0.400,0.39,0.55,0.75,-0.675,-0.700,-0.100,26,Male,Online,Postgraduate degree
Shy,1,,1,Yes	I put in a reasonable effort.,1,Pauline Hanson,Kevin Rudd,1,0.25,0.25,0.75,0.75,0.25,0.33,0.43,L,R,Turnbull,0,1,L1,0.07,-0.15,0.575,0.225,0.100,1.000,0.360,0.350,0.300,0.200,0.380,0.450,0.400,0.400,0.40,0.55,0.36,-0.350,0.900,-0.010,32,Male,Online,Postgraduate degree
,1,,1,Yes	I put in a reasonable effort.,1,Pauline Hanson,Kevin Rudd,1,0.50,0.50,0.50,0.50,0.25,0.33,0.43,L,R,Turnbull,0,1,L1,0.07,-0.15,0.425,0.000,0.300,1.000,0.483,0.317,0.500,0.300,0.450,0.350,0.500,0.300,0.21,0.65,0.40,-0.425,0.700,-0.167,18,Female,Lab,
,1,,1,Yes	I put in a reasonable effort.,1,Pauline Hanson,Kevin Rudd,1,0.25,0.75,0.75,0.25,0.25,0.33,0.43,L,R,Turnbull,0,1,L1,0.07,-0.15,0.500,0.325,0.700,0.900,0.570,0.467,0.400,0.300,0.610,0.500,0.700,0.600,0.41,0.80,0.52,-0.175,0.200,-0.103,18,Female,Lab,
Happy,0,Yes,0,Yes	I put in a reasonable effort.,1,Pauline Hanson,Kevin Rudd,1,0.25,0.75,0.25,0.50,0.25,0.67,0.44,L,R,Shorten,1,1,L1,0.06,-0.16,0.700,0.375,0.600,0.700,0.667,0.527,0.600,0.700,0.700,0.380,0.700,0.500,0.54,0.65,0.60,-0.325,0.100,-0.140,27,Male,Online,3-year university degree
Comfortable,0,No,1,Yes	I put in a reasonable effort.,1,Pauline Hanson,Kevin Rudd,1,0.25,0.50,0.50,0.75,0.00,0.67,0.44,L,R,Turnbull,0,1,L1,0.06,-0.16,0.725,0.475,0.800,0.700,0.707,0.633,0.700,0.500,0.720,0.700,0.700,0.700,0.60,0.75,0.67,-0.250,-0.100,-0.073,27,Female,Online,4-year university degree
Shy,1,,1,Yes	I put in a reasonable effort.,1,Pauline Hanson,Kevin Rudd,1,0.25,0.50,0.50,0.50,0.25,0.67,0.44,L,R,Turnbull,0,1,L1,0.06,-0.16,0.475,0.275,0.600,0.700,0.437,0.367,0.400,0.300,0.510,0.400,0.400,0.400,0.38,0.65,0.40,-0.200,0.100,-0.070,18,Male,Online,Some university, but no degree
Upset,0,,1,Yes	I put in a reasonable effort.,1,Pauline Hanson,Julie Bishop,0,0.25,0.25,0.75,0.25,0.75,0.50,0.46,L,R,Turnbull,0,1,L1,0.04,-0.18,0.550,0.375,0.600,0.400,0.523,0.667,0.600,0.800,0.670,0.500,0.300,0.700,0.46,0.50,0.60,-0.175,-0.200,0.143,34,Male,Online,Postgraduate degree
,1,,1,Yes	I put in a reasonable effort.,1,Peter Dutton,Kevin Rudd,0,0.25,0.25,0.75,0.75,0.25,0.50,0.46,L,R,Turnbull,0,1,L1,0.04,-0.18,0.550,0.175,0.700,1.000,0.533,0.200,0.500,0.200,0.500,0.300,0.600,0.100,0.36,0.85,0.37,-0.375,0.300,-0.333,22,Female,Lab,
,1,,1,Yes	I put in a reasonable effort.,1,Pauline Hanson,Kevin Rudd,1,0.25,0.25,1.00,0.50,0.25,0.50,0.46,L,R,Turnbull,0,1,L1,0.04,-0.18,0.375,0.125,0.500,0.000,0.200,0.000,0.500,0.000,0.000,0.000,0.100,0.000,0.25,0.25,0.10,-0.250,-0.500,-0.200,25,Female,Lab,
Shy,1,,1,Yes	I put in a reasonable effort.,1,Pauline Hanson,Kevin Rudd,1,0.25,0.25,1.00,0.75,0.25,0.33,0.47,L,R,Shorten,1,1,L1,0.03,-0.19,0.625,0.300,0.500,0.700,0.490,0.457,0.500,0.500,0.370,0.370,0.600,0.500,0.46,0.60,0.47,-0.325,0.200,-0.033,21,Male,Online,Postgraduate degree
,1,,1,Yes	I put in a reasonable effort.,1,Pauline Hanson,Kevin Rudd,1,0.50,0.25,0.75,0.50,0.50,0.33,0.47,L,R,Shorten,1,1,L1,0.03,-0.19,0.475,0.350,0.700,0.300,0.533,0.560,0.400,0.700,0.600,0.580,0.600,0.400,0.41,0.50,0.55,-0.125,-0.400,0.027,22,Male,Lab,
Shy,1,No,1,Yes	I put in a reasonable effort.,1,Pauline Hanson,Kevin Rudd,1,0.25,0.50,0.25,0.50,0.50,0.83,0.47,L,R,Turnbull,0,1,L1,0.03,-0.19,0.675,0.450,0.800,0.800,0.763,0.420,0.800,0.400,0.790,0.360,0.700,0.500,0.56,0.80,0.59,-0.225,0.000,-0.343,38,Male,Online,Postgraduate degree
Shy,1,,1,Yes	I put in a reasonable effort.,1,Pauline Hanson,Kevin Rudd,1,0.50,0.50,0.75,0.50,0.25,0.33,0.47,L,R,Turnbull,0,1,L1,0.03,-0.19,0.475,0.250,0.200,1.000,0.347,0.417,0.300,0.300,0.340,0.350,0.400,0.600,0.36,0.60,0.38,-0.225,0.800,0.070,22,Male,Online,4-year university degree
Shy,1,No,1,Yes	I put in a reasonable effort.,1,Pauline Hanson,Kevin Rudd,1,0.25,0.75,0.25,0.75,0.25,0.67,0.49,L,R,Shorten,1,1,L1,0.01,-0.20,0.800,0.475,0.900,0.800,0.617,0.560,0.600,0.600,0.650,0.580,0.600,0.500,0.64,0.85,0.59,-0.325,-0.100,-0.057,28,Male,Online,High school graduate
,1,,1,Yes	I put in a reasonable effort.,1,Pauline Hanson,Kevin Rudd,1,0.25,0.25,0.75,0.75,0.25,0.67,0.49,L,R,Turnbull,0,1,L1,0.01,-0.20,0.375,0.000,0.400,1.000,0.353,0.237,0.200,0.200,0.360,0.310,0.500,0.200,0.19,0.70,0.30,-0.375,0.600,-0.117,19,Male,Lab,
Happy,0,Yes,0,Yes	I put in a reasonable effort.,1,Pauline Hanson,Kevin Rudd,1,0.25,0.50,0.50,0.75,0.75,0.33,0.51,R,R,Turnbull,1,1,R1,0.01,-0.20,0.750,0.750,0.700,0.700,0.703,0.703,0.700,0.700,0.710,0.710,0.700,0.700,0.75,0.70,0.70,0.000,0.000,0.000,49,Male,Online,High school graduate
Shy,1,,1,Yes	I put in a reasonable effort.,1,Pauline Hanson,Kevin Rudd,1,0.50,0.75,0.75,0.50,0.25,0.33,0.51,R,R,Turnbull,1,1,R1,0.01,-0.20,0.575,0.200,0.700,0.900,0.603,0.603,0.600,0.600,0.610,0.610,0.600,0.600,0.39,0.80,0.60,-0.375,0.200,0.000,65,Female,Online,Postgraduate degree
Shy,1,,1,Yes	I put in a reasonable effort.,1,Pauline Hanson,Kevin Rudd,1,0.50,0.50,0.75,0.75,0.25,0.33,0.51,R,R,Turnbull,1,1,R1,0.01,-0.20,0.450,0.000,0.600,1.000,0.717,0.383,0.700,0.400,0.650,0.450,0.800,0.300,0.23,0.80,0.55,-0.450,0.400,-0.333,27,Male,Online,Postgraduate degree
Shy,1,No,1,Maybe	I was somewhat distracted.,1,Pauline Hanson,Kevin Rudd,1,0.75,0.25,0.50,0.50,1.00,0.17,0.53,R,R,Shorten,0,1,R1,0.03,-0.19,0.700,0.000,0.400,1.000,0.480,0.267,0.200,0.200,0.640,0.300,0.600,0.300,0.35,0.70,0.37,-0.700,0.600,-0.213,,Male,Online,Some university, but no degree
Shy,1,,1,Yes	I put in a reasonable effort.,1,Pauline Hanson,Julie Bishop,0,0.50,0.75,0.75,0.75,0.25,0.17,0.53,R,R,Turnbull,1,1,R1,0.03,-0.19,0.125,0.000,0.000,1.000,0.000,0.067,0.000,0.000,0.000,0.000,0.000,0.200,0.06,0.50,0.03,-0.125,1.000,0.067,29,Male,Online,TAFE or other non-university qualification
Confused,0,,1,Yes	I put in a reasonable effort.,1,Pauline Hanson,Kevin Rudd,1,0.25,0.75,0.25,0.75,0.50,0.67,0.53,R,R,Turnbull,1,1,R1,0.03,-0.19,0.625,0.375,0.700,0.400,0.747,0.537,0.800,0.500,0.740,0.510,0.700,0.600,0.50,0.55,0.64,-0.250,-0.300,-0.210,39,Male,Online,4-year university degree
,1,,1,Yes	I put in a reasonable effort.,1,Tony Abbott,Kevin Rudd,0,0.50,0.50,0.75,0.50,0.50,0.50,0.54,R,R,Shorten,0,1,R1,0.04,-0.18,0.575,0.125,0.600,1.000,0.467,0.223,0.500,0.200,0.500,0.270,0.400,0.200,0.35,0.80,0.35,-0.450,0.400,-0.243,17,Female,Lab,
Shy,1,No,1,Yes	I put in a reasonable effort.,1,Pauline Hanson,Kevin Rudd,1,0.50,0.50,0.75,0.50,0.50,0.50,0.54,R,R,Shorten,0,1,R1,0.04,-0.18,0.475,0.350,0.500,0.600,0.557,0.517,0.500,0.500,0.570,0.550,0.600,0.500,0.41,0.55,0.54,-0.125,0.100,-0.040,46,Male,Online,4-year university degree
Shy,1,No,1,Yes	I put in a reasonable effort.,1,Pauline Hanson,Kevin Rudd,1,0.50,0.75,0.50,0.50,0.50,0.50,0.54,R,R,Shorten,0,1,R1,0.04,-0.18,0.550,0.000,0.000,1.000,0.780,0.420,0.800,0.500,0.940,0.360,0.600,0.400,0.28,0.50,0.60,-0.550,1.000,-0.360,35,Male,Online,4-year university degree
Shy,1,No,1,Yes	I put in a reasonable effort.,1,Pauline Hanson,Kevin Rudd,1,0.75,0.75,0.50,0.50,0.25,0.50,0.54,R,R,Shorten,0,1,R1,0.04,-0.18,0.575,0.550,0.600,0.600,0.563,0.663,0.500,0.600,0.690,0.690,0.500,0.700,0.56,0.60,0.61,-0.025,0.000,0.100,23,Male,Online,Postgraduate degree
Shy,1,,1,Yes	I put in a reasonable effort.,1,Pauline Hanson,Kevin Rudd,1,0.25,0.50,0.25,1.00,0.25,1.00,0.54,R,R,Shorten,0,1,R1,0.04,-0.18,0.750,0.450,0.700,0.200,0.743,0.373,0.900,0.200,0.730,0.520,0.600,0.400,0.60,0.45,0.56,-0.300,-0.500,-0.370,21,Male,Online,Some university, but no degree
Happy,0,,1,Yes	I put in a reasonable effort.,1,Kristina Keneally,Kevin Rudd,0,0.25,0.75,0.50,0.75,0.25,0.83,0.56,R,R,Shorten,0,1,R1,0.06,-0.16,0.650,0.825,0.700,0.900,0.680,0.870,0.600,0.900,0.740,0.810,0.700,0.900,0.74,0.80,0.78,0.175,0.200,0.190,38,Female,Online,4-year university degree
Shy,1,No,1,Maybe	I was somewhat distracted.,1,Pauline Hanson,Kevin Rudd,1,0.50,0.50,0.75,0.75,0.50,0.33,0.56,R,R,Shorten,0,1,R1,0.06,-0.16,0.600,0.600,0.600,0.600,0.620,0.610,0.600,0.600,0.660,0.630,0.600,0.600,0.60,0.60,0.62,0.000,0.000,-0.010,46,Female,Online,TAFE or other non-university qualification
Shy,1,,1,Yes	I put in a reasonable effort.,1,Pauline Hanson,Kevin Rudd,1,0.50,0.50,1.00,0.75,0.25,0.33,0.56,R,R,Shorten,0,1,R1,0.06,-0.16,0.225,0.000,0.700,1.000,0.000,0.067,0.000,0.000,0.000,0.000,0.000,0.200,0.11,0.85,0.03,-0.225,0.300,0.067,21,Male,Online,Some university, but no degree
Shy,1,,1,Yes	I put in a reasonable effort.,1,Pauline Hanson,Kevin Rudd,1,0.75,0.25,0.75,1.00,0.25,0.33,0.56,R,R,Turnbull,1,1,R1,0.06,-0.16,0.425,0.100,0.700,0.900,0.433,0.100,0.500,0.000,0.400,0.100,0.400,0.200,0.26,0.80,0.27,-0.325,0.200,-0.333,27,Female,Online,Postgraduate degree
Satisfied,0,,1,Yes	I put in a reasonable effort.,1,Kristina Keneally,Corey Bernardi,0,0.75,0.50,0.75,0.50,0.25,0.67,0.57,R,R,Shorten,0,1,R1,0.07,-0.15,0.500,0.500,0.600,0.500,0.510,0.607,0.300,0.800,0.630,0.820,0.600,0.200,0.50,0.55,0.56,0.000,-0.100,0.097,28,Female,Online,3-year university degree
Shy,1,No,1,Yes	I put in a reasonable effort.,1,Pauline Hanson,Kevin Rudd,1,0.25,0.50,0.75,0.75,0.50,0.67,0.57,R,R,Shorten,0,1,R1,0.07,-0.15,0.475,0.050,0.700,1.000,0.550,0.183,0.400,0.100,0.650,0.250,0.600,0.200,0.26,0.85,0.37,-0.425,0.300,-0.367,33,Female,Online,Postgraduate degree
Comfortable,0,No,1,Yes	I put in a reasonable effort.,1,Pauline Hanson,Kevin Rudd,1,0.00,0.50,0.75,0.75,0.75,0.67,0.57,R,R,Turnbull,1,1,R1,0.07,-0.15,0.650,0.775,1.000,0.900,0.717,0.760,0.700,0.700,0.650,0.880,0.800,0.700,0.71,0.95,0.74,0.125,-0.100,0.043,27,Male,Online,TAFE or other non-university qualification
Curious,0,No,1,Yes	I put in a reasonable effort.,1,Pauline Hanson,Kevin Rudd,1,0.50,0.75,0.75,0.75,0.00,0.67,0.57,R,R,Turnbull,1,1,R1,0.07,-0.15,0.650,0.675,0.400,0.800,0.633,0.767,0.600,0.700,0.700,0.900,0.600,0.700,0.66,0.60,0.70,0.025,0.400,0.133,27,Male,Online,Postgraduate degree
Shy,1,No,1,Yes	I put in a reasonable effort.,1,Pauline Hanson,Kevin Rudd,1,0.50,0.50,0.75,0.50,0.50,0.67,0.57,R,R,Turnbull,1,1,R1,0.07,-0.15,0.850,0.850,0.800,0.900,0.733,0.903,0.700,0.900,0.700,0.910,0.800,0.900,0.85,0.85,0.82,0.000,0.100,0.170,58,Female,Online,TAFE or other non-university qualification
Happy,0,,1,Yes	I put in a reasonable effort.,1,Pauline Hanson,Kevin Rudd,1,0.75,0.50,0.75,0.25,0.75,0.50,0.58,R,R,Shorten,0,1,R1,0.08,-0.14,0.650,0.500,0.400,0.100,0.610,0.537,0.600,0.700,0.630,0.610,0.600,0.300,0.58,0.25,0.57,-0.150,-0.300,-0.073,19,Male,Online,High school graduate
,1,,1,Yes	I put in a reasonable effort.,1,Pauline Hanson,Kevin Rudd,1,0.50,0.50,0.75,0.75,0.50,0.50,0.58,R,R,Turnbull,1,1,R1,0.08,-0.14,0.525,0.225,0.500,0.900,0.483,0.387,0.400,0.300,0.450,0.360,0.600,0.500,0.38,0.70,0.44,-0.300,0.400,-0.097,19,Male,Lab,
Shy,1,,1,Yes	I put in a reasonable effort.,1,Pauline Hanson,Kevin Rudd,1,0.50,0.50,0.75,0.75,0.75,0.33,0.60,R,R,Turnbull,1,1,R1,0.10,-0.12,0.375,0.175,0.600,0.800,0.327,0.327,0.300,0.400,0.280,0.280,0.400,0.300,0.28,0.70,0.33,-0.200,0.200,0.000,31,Female,Online,4-year university degree
,1,,1,Maybe	I was somewhat distracted.,1,Pauline Hanson,Kevin Rudd,1,0.75,0.25,0.50,0.75,0.75,0.67,0.61,R,R,Turnbull,1,1,R1,0.11,-0.11,0.700,0.000,0.500,0.000,0.703,0.570,0.700,0.500,0.610,0.610,0.800,0.600,0.35,0.25,0.64,-0.700,-0.500,-0.133,20,Female,Lab,
Bored,0,,1,Maybe	I was somewhat distracted.,1,Pauline Hanson,Kevin Rudd,1,0.25,0.75,0.00,0.75,1.00,1.00,0.63,R,R,Shorten,0,1,R1,0.13,-0.09,0.425,0.600,0.700,0.500,0.677,0.490,0.900,0.400,0.730,0.670,0.400,0.400,0.51,0.60,0.58,0.175,-0.200,-0.187,19,Male,Online,TAFE or other non-university qualification
Shy,1,,1,Yes	I put in a reasonable effort.,1,Pauline Hanson,Kevin Rudd,1,0.75,0.50,0.75,0.50,0.75,0.50,0.63,R,R,Shorten,0,1,R1,0.13,-0.09,0.375,0.000,0.200,0.900,0.400,0.333,0.400,0.400,0.500,0.400,0.300,0.200,0.19,0.55,0.37,-0.375,0.700,-0.067,21,Female,Online,Some university, but no degree
Shy,1,No,1,Yes	I put in a reasonable effort.,1,Pauline Hanson,Kevin Rudd,1,0.50,0.75,0.75,0.50,0.75,0.50,0.63,R,R,Turnbull,1,1,R1,0.13,-0.09,0.325,0.775,0.100,0.300,0.263,0.650,0.200,0.500,0.290,0.650,0.300,0.800,0.55,0.20,0.46,0.450,0.200,0.387,27,Female,Online,4-year university degree
Shy,1,No,1,Yes	I put in a reasonable effort.,1,Pauline Hanson,Kevin Rudd,1,0.75,0.75,0.75,0.25,0.75,0.50,0.63,R,R,Turnbull,1,1,R1,0.13,-0.09,0.475,0.000,0.700,1.000,0.600,0.407,0.500,0.500,0.700,0.520,0.600,0.200,0.24,0.85,0.50,-0.475,0.300,-0.193,39,Female,Online,4-year university degree
Shy,1,,1,Yes	I put in a reasonable effort.,1,Pauline Hanson,Kevin Rudd,1,0.50,0.50,1.00,0.50,0.75,0.50,0.63,R,R,Turnbull,1,1,R1,0.13,-0.09,0.475,0.200,0.700,1.000,0.467,0.497,0.300,0.400,0.500,0.490,0.600,0.600,0.34,0.85,0.48,-0.275,0.300,0.030,20,Male,Online,Some university, but no degree
Shy,1,,1,Yes	I put in a reasonable effort.,1,Pauline Hanson,Kevin Rudd,1,0.75,0.75,0.50,0.50,1.00,0.33,0.64,R,R,Shorten,0,1,R1,0.14,-0.08,0.700,0.000,1.000,1.000,0.130,0.000,0.000,0.000,0.090,0.000,0.300,0.000,0.35,1.00,0.07,-0.700,0.000,-0.130,23,Male,Online,Some university, but no degree
Satisfied,0,No,1,Yes	I put in a reasonable effort.,1,Pauline Hanson,Kevin Rudd,1,1.00,0.75,0.00,1.00,0.75,0.50,0.67,R,R,Shorten,0,1,R1,0.17,-0.05,0.600,0.900,0.700,1.000,0.387,0.827,0.600,0.900,0.560,0.680,0.000,0.900,0.75,0.85,0.61,0.300,0.300,0.440,52,Female,Online,High school graduate
Happy,0,,1,Yes	I put in a reasonable effort.,1,Tony Abbott,Gareth Evans,0,0.75,0.50,0.75,0.75,0.75,0.50,0.67,R,R,Turnbull,1,1,R1,0.17,-0.05,0.575,0.575,0.600,0.400,0.720,0.557,0.700,0.400,0.660,0.670,0.800,0.600,0.58,0.50,0.64,0.000,-0.200,-0.163,23,Male,Online,3-year university degree
Shy,1,Yes,0,Yes	I put in a reasonable effort.,1,Pauline Hanson,Kevin Rudd,1,1.00,0.50,0.00,1.00,1.00,0.50,0.67,R,R,Turnbull,1,1,R1,0.17,-0.05,0.325,0.750,0.000,0.000,0.167,0.267,0.000,0.000,0.500,0.500,0.000,0.300,0.54,0.00,0.22,0.425,0.000,0.100,60,Male,Online,TAFE or other non-university qualification
Shy,1,No,1,Yes	I put in a reasonable effort.,1,Pauline Hanson,Kevin Rudd,1,0.75,0.75,0.75,0.50,0.75,0.50,0.67,R,R,Turnbull,1,1,R1,0.17,-0.05,0.625,0.300,0.600,0.200,0.800,0.370,0.800,0.400,0.800,0.410,0.800,0.300,0.46,0.40,0.59,-0.325,-0.400,-0.430,68,Male,Online,TAFE or other non-university qualification
Shy,1,,1,Yes	I put in a reasonable effort.,1,Pauline Hanson,Kevin Rudd,1,1.00,0.00,1.00,0.75,0.75,0.50,0.67,R,R,Turnbull,1,1,R1,0.17,-0.05,0.125,0.100,0.200,0.100,0.000,0.033,0.000,0.100,0.000,0.000,0.000,0.000,0.11,0.15,0.02,-0.025,-0.100,0.033,38,Male,Online,Some university, but no degree
Shy,1,,1,Maybe	I was somewhat distracted.,1,Pauline Hanson,Peter Garrett,0,0.75,0.75,1.00,0.50,0.75,0.33,0.68,R,R,Shorten,0,1,R1,0.18,-0.04,0.475,0.500,0.700,0.300,0.533,0.500,0.500,0.500,0.500,0.500,0.600,0.500,0.49,0.50,0.52,0.025,-0.400,-0.033,25,Male,Online,4-year university degree
Shy,1,,1,Yes	I put in a reasonable effort.,1,Julia Gillard,Peter Garrett,0,0.75,0.75,0.25,0.75,0.75,0.83,0.68,R,R,Turnbull,1,1,R1,0.18,-0.04,0.425,1.000,0.000,1.000,0.707,0.843,1.000,1.000,0.520,0.530,0.600,1.000,0.71,0.50,0.78,0.575,1.000,0.137,54,Female,Online,Did not graduate from high school
Shy,1,No,1,Yes	I put in a reasonable effort.,1,Pauline Hanson,Kevin Rudd,1,0.75,0.75,0.75,0.25,0.75,0.83,0.68,R,R,Turnbull,1,1,R1,0.18,-0.04,0.450,0.175,0.700,1.000,0.277,0.310,0.400,0.300,0.230,0.230,0.200,0.400,0.31,0.85,0.29,-0.275,0.300,0.033,45,Female,Online,High school graduate
Shy,1,,1,Yes	I put in a reasonable effort.,1,Pauline Hanson,Kevin Rudd,1,0.75,0.75,1.00,0.25,0.75,0.67,0.69,R,R,Shorten,0,1,R1,0.19,-0.02,0.350,0.025,0.400,0.300,0.483,0.267,0.400,0.200,0.450,0.300,0.600,0.300,0.19,0.35,0.38,-0.325,-0.100,-0.217,18,Male,Online,High school graduate
Shy,1,,1,Yes	I put in a reasonable effort.,1,Pauline Hanson,Kevin Rudd,1,0.75,0.75,0.50,0.75,0.75,0.67,0.69,R,R,Shorten,0,1,R1,0.19,-0.02,0.350,0.000,0.500,0.900,0.167,0.097,0.000,0.000,0.200,0.190,0.300,0.100,0.18,0.70,0.13,-0.350,0.400,-0.070,20,Female,Online,Some university, but no degree
,1,,1,Yes	I put in a reasonable effort.,1,Pauline Hanson,Kevin Rudd,1,0.75,0.75,0.75,0.50,0.75,0.67,0.69,R,R,Shorten,0,1,R1,0.19,-0.02,0.350,0.100,0.700,0.800,0.450,0.263,0.300,0.200,0.450,0.290,0.600,0.300,0.23,0.75,0.36,-0.250,0.100,-0.187,17,Female,Lab,
Shy,1,No,1,Yes	I put in a reasonable effort.,1,Pauline Hanson,Kevin Rudd,1,0.75,0.75,0.50,0.75,0.75,0.67,0.69,R,R,Turnbull,1,1,R1,0.19,-0.02,0.700,0.375,0.800,0.800,0.757,0.373,0.700,0.400,0.770,0.320,0.800,0.400,0.54,0.80,0.57,-0.325,0.000,-0.383,25,Male,Online,4-year university degree
Shy,1,No,1,Yes	I put in a reasonable effort.,1,Pauline Hanson,Kevin Rudd,1,0.75,0.75,0.75,0.50,0.75,0.67,0.69,R,R,Turnbull,1,1,R1,0.19,-0.02,0.650,0.375,0.800,1.000,0.533,0.703,0.200,0.700,0.700,0.710,0.700,0.700,0.51,0.90,0.62,-0.275,0.200,0.170,68,Female,Online,Postgraduate degree
,1,,1,Yes	I put in a reasonable effort.,1,Pauline Hanson,Kevin Rudd,1,0.50,0.75,1.00,0.50,0.75,0.67,0.69,R,R,Turnbull,1,1,R1,0.19,-0.02,0.425,0.050,0.600,0.900,0.570,0.403,0.600,0.500,0.510,0.510,0.600,0.200,0.24,0.75,0.49,-0.375,0.300,-0.167,20,Female,Lab,
Shy,1,,1,Yes	I put in a reasonable effort.,1,Pauline Hanson,Kevin Rudd,1,0.75,0.75,0.75,0.50,0.75,0.83,0.72,R,R,Shorten,0,1,R1,0.22,0.00,0.500,0.300,0.800,0.800,0.437,0.403,0.400,0.400,0.410,0.410,0.500,0.400,0.40,0.80,0.42,-0.200,0.000,-0.033,32,Male,Online,Some university, but no degree
,1,,1,Yes	I put in a reasonable effort.,1,Pauline Hanson,Kevin Rudd,1,0.75,0.75,0.75,0.50,0.75,0.83,0.72,R,R,Shorten,0,1,R1,0.22,0.00,0.625,0.000,0.600,1.000,0.367,0.167,0.300,0.100,0.400,0.200,0.400,0.200,0.31,0.80,0.27,-0.625,0.400,-0.200,26,Male,Lab,
Shy,1,No,1,Yes	I put in a reasonable effort.,1,Pauline Hanson,Kevin Rudd,1,0.75,0.75,0.50,0.75,0.75,0.83,0.72,R,R,Turnbull,1,1,R1,0.22,0.00,0.700,0.500,0.100,0.500,0.000,0.033,0.000,0.000,0.000,0.000,0.000,0.100,0.60,0.30,0.02,-0.200,0.400,0.033,63,Male,Online,4-year university degree
Shy,1,,1,Yes	I put in a reasonable effort.,1,Pauline Hanson,Kevin Rudd,1,0.75,0.75,0.75,0.75,0.75,0.67,0.74,R,R,Turnbull,1,1,R1,0.24,0.02,0.575,0.600,0.600,0.400,0.680,0.763,0.700,0.800,0.640,0.690,0.700,0.800,0.59,0.50,0.72,0.025,-0.200,0.083,19,Male,Online,Some university, but no degree
,1,,1,Yes	I put in a reasonable effort.,1,Pauline Hanson,Kevin Rudd,1,0.75,0.75,1.00,0.50,0.75,0.67,0.74,R,R,Turnbull,1,1,R1,0.24,0.02,0.300,0.000,0.500,1.000,0.567,0.500,0.600,0.500,0.500,0.500,0.600,0.500,0.15,0.75,0.53,-0.300,0.500,-0.067,18,Male,Lab,
Satisfied,0,,1,Yes	I put in a reasonable effort.,1,Pauline Hanson,Kevin Rudd,1,0.75,0.75,0.75,0.75,1.00,0.50,0.75,R,R,Shorten,0,1,R1,0.25,0.03,0.575,0.250,0.800,1.000,0.533,0.490,0.400,0.300,0.600,0.570,0.600,0.600,0.41,0.90,0.51,-0.325,0.200,-0.043,30,Male,Online,Postgraduate degree
,1,,1,Yes	I put in a reasonable effort.,1,Pauline Hanson,Kevin Rudd,1,0.75,1.00,1.00,0.50,0.75,0.50,0.75,R,R,Shorten,0,1,R1,0.25,0.03,0.600,0.000,0.400,0.000,0.403,0.470,0.300,0.300,0.510,0.510,0.400,0.600,0.30,0.20,0.44,-0.600,-0.400,0.067,19,Female,Lab,
Shy,1,No,1,Yes	I put in a reasonable effort.,1,Pauline Hanson,Kevin Rudd,1,1.00,1.00,0.00,1.00,1.00,0.50,0.75,R,R,Turnbull,1,1,R1,0.25,0.03,0.975,0.975,1.000,1.000,0.967,1.000,1.000,1.000,1.000,1.000,0.900,1.000,0.98,1.00,0.98,0.000,0.000,0.033,72,Male,Online,Did not graduate from high school
Satisfied,0,No,1,Yes	I put in a reasonable effort.,1,Pauline Hanson,Kevin Rudd,1,1.00,0.75,0.75,1.00,0.25,0.83,0.76,R,R,Shorten,0,1,R1,0.26,0.05,0.600,0.000,0.800,1.000,0.393,0.390,0.200,0.200,0.480,0.470,0.500,0.500,0.30,0.90,0.39,-0.600,0.200,-0.003,68,Female,Online,TAFE or other non-university qualification
Shy,1,No,1,Yes	I put in a reasonable effort.,1,Pauline Hanson,Kevin Rudd,1,0.75,0.75,0.75,0.75,0.75,0.83,0.76,R,R,Shorten,0,1,R1,0.26,0.05,0.625,0.700,0.400,0.400,0.603,0.717,0.800,0.700,0.410,0.750,0.600,0.700,0.66,0.40,0.66,0.075,0.000,0.113,27,Male,Online,High school graduate
,1,,1,Yes	I put in a reasonable effort.,1,Pauline Hanson,Kevin Rudd,1,0.75,0.75,0.75,0.75,0.75,0.83,0.76,R,R,Shorten,0,1,R1,0.26,0.05,0.300,0.000,0.300,1.000,0.537,0.293,0.600,0.300,0.510,0.280,0.500,0.300,0.15,0.65,0.42,-0.300,0.700,-0.243,19,Female,Lab,
Shy,1,,1,Yes	I put in a reasonable effort.,1,Pauline Hanson,Peter Garrett,0,0.75,0.75,1.00,1.00,1.00,0.17,0.78,R,R,Shorten,0,1,R1,0.28,0.06,0.425,0.375,0.600,1.000,0.277,0.347,0.300,0.400,0.330,0.440,0.200,0.200,0.40,0.80,0.31,-0.050,0.400,0.070,33,Female,Online,Some university, but no degree
Happy,0,No,1,Yes	I put in a reasonable effort.,1,Pauline Hanson,Kevin Rudd,1,1.00,0.75,0.75,0.50,1.00,0.67,0.78,R,R,Shorten,0,1,R1,0.28,0.06,0.575,0.200,0.600,1.000,0.300,0.333,0.000,0.000,0.300,0.400,0.600,0.600,0.39,0.80,0.32,-0.375,0.400,0.033,38,Male,Online,Postgraduate degree
Shy,1,No,1,Yes	I put in a reasonable effort.,1,Pauline Hanson,Kevin Rudd,1,0.75,0.75,1.00,0.75,0.75,0.67,0.78,R,R,Shorten,0,1,R1,0.28,0.06,0.575,0.225,0.700,1.000,0.367,0.300,0.100,0.100,0.400,0.400,0.600,0.400,0.40,0.85,0.33,-0.350,0.300,-0.067,32,Female,Online,TAFE or other non-university qualification
Shy,1,No,1,Yes	I put in a reasonable effort.,1,Pauline Hanson,Kevin Rudd,1,1.00,0.75,0.75,0.75,0.75,0.67,0.78,R,R,Shorten,0,1,R1,0.28,0.06,0.375,0.000,0.300,0.700,0.033,0.020,0.000,0.000,0.000,0.060,0.100,0.000,0.19,0.50,0.03,-0.375,0.400,-0.013,36,Male,Online,Postgraduate degree
Shy,1,,1,Yes	I put in a reasonable effort.,1,Pauline Hanson,Kevin Rudd,1,0.75,0.75,1.00,0.75,0.75,0.67,0.78,R,R,Shorten,0,1,R1,0.28,0.06,0.700,0.000,0.900,1.000,0.390,0.160,0.200,0.100,0.470,0.180,0.500,0.200,0.35,0.95,0.28,-0.700,0.100,-0.230,30,Male,Online,Postgraduate degree
,1,,1,Yes	I put in a reasonable effort.,1,Pauline Hanson,Kevin Rudd,1,0.75,0.75,1.00,0.75,0.75,0.67,0.78,R,R,Turnbull,1,1,R1,0.28,0.06,0.475,0.000,0.600,1.000,0.493,0.333,0.700,0.500,0.280,0.200,0.500,0.300,0.24,0.80,0.41,-0.475,0.400,-0.160,19,Male,Lab,
Shy,1,No,1,Yes	I put in a reasonable effort.,1,Pauline Hanson,Kevin Rudd,1,1.00,0.75,0.75,0.75,0.75,0.83,0.81,R,R,Shorten,0,1,R1,0.31,0.09,0.475,0.200,0.300,0.800,0.133,0.233,0.000,0.000,0.200,0.200,0.200,0.500,0.34,0.55,0.18,-0.275,0.500,0.100,71,Female,Online,Some university, but no degree
Shy,1,,1,Yes	I put in a reasonable effort.,1,Pauline Hanson,Kevin Rudd,1,0.75,0.75,1.00,0.75,0.75,0.83,0.81,R,R,Shorten,0,1,R1,0.31,0.09,0.700,0.325,0.600,1.000,0.333,0.300,0.300,0.300,0.200,0.300,0.500,0.300,0.51,0.80,0.32,-0.375,0.400,-0.033,30,Male,Online,Some university, but no degree
Shy,1,No,1,Yes	I put in a reasonable effort.,1,Pauline Hanson,Kevin Rudd,1,1.00,0.75,0.75,0.75,0.75,0.83,0.81,R,R,Turnbull,1,1,R1,0.31,0.09,0.675,0.675,0.800,0.500,0.503,0.570,0.700,0.700,0.410,0.410,0.400,0.600,0.68,0.65,0.54,0.000,-0.300,0.067,62,Female,Online,High school graduate
Shy,1,No,1,Yes	I put in a reasonable effort.,1,Pauline Hanson,Kevin Rudd,1,1.00,0.75,1.00,0.75,0.75,0.67,0.82,R,R,Turnbull,1,1,R1,0.32,0.10,0.550,0.700,0.800,0.700,0.623,0.747,0.600,0.700,0.770,0.840,0.500,0.700,0.63,0.75,0.69,0.150,-0.100,0.123,45,Female,Online,3-year university degree
Shy,1,No,1,Yes	I put in a reasonable effort.,1,Pauline Hanson,Kevin Rudd,1,1.00,1.00,0.75,1.00,0.25,1.00,0.83,R,R,Shorten,0,1,R1,0.33,0.11,0.675,0.050,0.500,0.900,0.107,0.050,0.100,0.000,0.020,0.050,0.200,0.100,0.36,0.70,0.08,-0.625,0.400,-0.057,72,Female,Online,Did not graduate from high school
Shy,1,No,1,Yes	I put in a reasonable effort.,1,Pauline Hanson,Kevin Rudd,1,1.00,1.00,1.00,0.50,1.00,0.50,0.83,R,R,Shorten,0,1,R1,0.33,0.11,0.775,0.775,0.800,0.700,0.300,0.367,0.000,0.000,0.400,0.400,0.500,0.700,0.78,0.75,0.33,0.000,-0.100,0.067,65,Male,Online,Did not graduate from high school
Shy,1,No,1,Yes	I put in a reasonable effort.,1,Pauline Hanson,Kevin Rudd,1,1.00,1.00,1.00,0.75,0.25,1.00,0.83,R,R,Shorten,0,1,R1,0.33,0.11,0.075,0.125,0.000,0.000,0.037,0.033,0.000,0.000,0.010,0.000,0.100,0.100,0.10,0.00,0.04,0.050,0.000,-0.003,49,Male,Online,TAFE or other non-university qualification
Shy,1,No,1,Yes	I put in a reasonable effort.,1,Pauline Hanson,Kevin Rudd,1,1.00,1.00,0.50,1.00,1.00,0.50,0.83,R,R,Turnbull,1,1,R1,0.33,0.11,0.425,0.000,0.600,0.000,0.000,0.100,0.000,0.000,0.000,0.000,0.000,0.300,0.21,0.30,0.05,-0.425,-0.600,0.100,60,Female,Online,TAFE or other non-university qualification
,1,,1,Yes	I put in a reasonable effort.,1,Pauline Hanson,Kevin Rudd,1,0.75,0.75,1.00,0.75,1.00,0.83,0.85,R,R,Turnbull,1,1,R1,0.35,0.13,0.525,0.100,0.400,1.000,0.467,0.300,0.600,0.400,0.400,0.300,0.400,0.200,0.31,0.70,0.38,-0.425,0.600,-0.167,19,Female,Lab,
Shy,1,,1,Yes	I put in a reasonable effort.,1,Pauline Hanson,Kevin Rudd,1,1.00,1.00,1.00,0.75,0.75,0.67,0.86,R,R,Turnbull,1,1,R1,0.36,0.14,0.525,0.525,0.500,0.700,0.800,0.800,0.900,0.900,0.800,0.800,0.700,0.700,0.53,0.60,0.80,0.000,0.200,0.000,18,Male,Online,Some university, but no degree
,1,,1,Yes	I put in a reasonable effort.,1,Pauline Hanson,Kevin Rudd,1,1.00,1.00,1.00,0.75,0.75,0.67,0.86,R,R,Turnbull,1,1,R1,0.36,0.14,0.425,0.150,0.300,0.800,0.800,0.700,0.800,0.800,0.900,0.800,0.700,0.500,0.29,0.55,0.75,-0.275,0.500,-0.100,19,Female,Lab,
Shy,1,No,1,Yes	I put in a reasonable effort.,1,Pauline Hanson,Kevin Rudd,1,1.00,1.00,1.00,0.75,0.75,0.83,0.89,R,R,Turnbull,1,1,R1,0.39,0.17,0.350,0.075,0.600,0.700,0.537,0.503,0.600,0.600,0.610,0.610,0.400,0.300,0.21,0.65,0.52,-0.275,0.100,-0.033,33,Male,Online,3-year university degree
Shy,1,No,1,Yes	I put in a reasonable effort.,1,Pauline Hanson,Kevin Rudd,1,1.00,1.00,1.00,0.75,0.75,0.83,0.89,R,R,Turnbull,1,1,R1,0.39,0.17,0.625,0.125,0.300,1.000,0.857,0.653,1.000,0.700,0.870,0.660,0.700,0.600,0.38,0.65,0.76,-0.500,0.700,-0.203,38,Female,Online,Postgraduate degree
Shy,1,,1,Yes	I put in a reasonable effort.,1,Pauline Hanson,Kevin Rudd,1,1.00,1.00,1.00,0.50,1.00,0.83,0.89,R,R,Turnbull,1,1,R1,0.39,0.17,0.600,0.000,0.900,1.000,0.800,0.677,0.800,0.800,0.800,0.730,0.800,0.500,0.30,0.95,0.74,-0.600,0.100,-0.123,49,Female,Online,Postgraduate degree
Shy,1,No,1,Yes	I put in a reasonable effort.,1,Pauline Hanson,Kevin Rudd,1,1.00,1.00,1.00,1.00,1.00,0.50,0.92,R,R,Turnbull,1,1,R1,0.42,0.20,0.575,0.400,0.600,0.400,0.667,0.470,0.600,0.400,0.700,0.610,0.700,0.400,0.49,0.50,0.57,-0.175,-0.200,-0.197,67,Female,Online,Did not graduate from high school
Shy,1,,1,Yes	I put in a reasonable effort.,1,Pauline Hanson,Kevin Rudd,1,1.00,1.00,0.75,0.75,1.00,1.00,0.92,R,R,Turnbull,1,1,R1,0.42,0.20,0.675,0.275,0.600,0.800,0.833,0.703,0.900,0.700,0.800,0.810,0.800,0.600,0.48,0.70,0.77,-0.400,0.200,-0.130,29,Male,Online,4-year university degree
Shy,1,No,1,Yes	I put in a reasonable effort.,1,Pauline Hanson,Kevin Rudd,1,1.00,1.00,1.00,0.75,1.00,0.83,0.93,R,R,Shorten,0,1,R1,0.43,0.21,0.350,0.000,0.600,0.000,0.270,0.230,0.000,0.000,0.510,0.390,0.300,0.300,0.18,0.30,0.25,-0.350,-0.600,-0.040,81,Male,Online,Did not graduate from high school
Shy,1,,1,Yes	I put in a reasonable effort.,1,Pauline Hanson,Kevin Rudd,1,1.00,1.00,1.00,1.00,0.75,0.83,0.93,R,R,Shorten,0,1,R1,0.43,0.21,0.475,0.000,0.300,0.000,0.177,0.143,0.100,0.100,0.130,0.130,0.300,0.200,0.24,0.15,0.16,-0.475,-0.300,-0.033,32,Male,Online,4-year university degree
,1,,1,Yes	I put in a reasonable effort.,1,Pauline Hanson,Kevin Rudd,1,1.00,1.00,1.00,0.75,1.00,0.83,0.93,R,R,Shorten,0,1,R1,0.43,0.21,0.375,0.150,0.600,0.000,0.130,0.093,0.000,0.000,0.190,0.080,0.200,0.200,0.26,0.30,0.11,-0.225,-0.600,-0.037,19,Female,Lab,
Shy,1,No,1,Yes	I put in a reasonable effort.,1,Pauline Hanson,Kevin Rudd,1,1.00,1.00,1.00,0.75,1.00,0.83,0.93,R,R,Turnbull,1,1,R1,0.43,0.21,0.850,0.550,0.900,1.000,0.957,0.923,1.000,1.000,0.970,0.970,0.900,0.800,0.70,0.95,0.94,-0.300,0.100,-0.033,61,Female,Online,TAFE or other non-university qualification
,1,,1,Yes	I put in a reasonable effort.,1,Pauline Hanson,Kevin Rudd,1,1.00,1.00,1.00,0.75,1.00,0.83,0.93,R,R,Turnbull,1,1,R1,0.43,0.21,0.475,0.225,0.600,0.900,0.667,0.633,0.700,0.700,0.600,0.500,0.700,0.700,0.35,0.75,0.65,-0.250,0.300,-0.033,36,Male,Lab,
Shy,1,,1,Yes	I put in a reasonable effort.,1,Pauline Hanson,Kevin Rudd,1,1.00,1.00,1.00,0.75,1.00,1.00,0.96,R,R,Shorten,0,1,R1,0.46,0.24,0.475,0.600,0.700,0.600,0.167,0.167,0.000,0.000,0.000,0.000,0.500,0.500,0.54,0.65,0.17,0.125,-0.100,0.000,31,Male,Online,Postgraduate degree
Shy,1,No,1,Yes	I put in a reasonable effort.,1,Pauline Hanson,Kevin Rudd,1,1.00,1.00,1.00,1.00,1.00,0.83,0.97,R,R,Shorten,0,1,R1,0.47,0.25,0.100,0.000,0.100,0.800,0.027,0.033,0.000,0.000,0.080,0.000,0.000,0.100,0.05,0.45,0.03,-0.100,0.700,0.007,49,Female,Online,TAFE or other non-university qualification
Happy,0,No,1,Yes	I put in a reasonable effort.,1,Pauline Hanson,Kevin Rudd,1,1.00,1.00,1.00,1.00,1.00,0.83,0.97,R,R,Turnbull,1,1,R1,0.47,0.25,0.625,0.250,0.600,0.300,0.703,0.677,0.700,0.700,0.710,0.730,0.700,0.600,0.44,0.45,0.69,-0.375,-0.300,-0.027,63,Male,Online,4-year university degree
Shy,1,No,1,Yes	I put in a reasonable effort.,1,Pauline Hanson,Kevin Rudd,1,1.00,1.00,1.00,1.00,1.00,1.00,1.00,R,R,Shorten,0,1,R1,0.50,0.28,0.450,0.000,0.700,1.000,0.033,0.033,0.000,0.000,0.000,0.000,0.100,0.100,0.23,0.85,0.03,-0.450,0.300,0.000,19,Female,Online,High school graduate
,1,,1,Yes	I put in a reasonable effort.,1,Pauline Hanson,Kevin Rudd,1,1.00,1.00,1.00,1.00,1.00,1.00,1.00,R,R,Turnbull,1,1,R1,0.50,0.28,0.750,0.150,0.800,0.900,0.250,0.250,0.000,0.000,0.150,0.150,0.600,0.600,0.45,0.85,0.25,-0.600,0.100,0.000,20,Female,Lab,
,1,,1,Maybe	I was somewhat distracted.,1,Malcolm Fraser,Julie Bishop,0,0.50,0.50,0.50,0.50,0.50,0.50,0.50,,R,Shorten,1,1,,0.00,-0.22,0.725,0.000,0.500,1.000,0.520,0.067,0.500,0.000,0.460,0.100,0.600,0.100,0.36,0.75,0.29,-0.725,0.500,-0.453,21,Female,Lab,
Shy,1,,1,Yes	I put in a reasonable effort.,1,Pauline Hanson,Edith Cowan,0,0.50,0.75,0.75,0.25,0.25,0.50,0.50,,R,Shorten,1,1,,0.00,-0.22,0.400,0.500,0.400,0.800,0.627,0.200,0.400,0.100,0.780,0.300,0.700,0.200,0.45,0.60,0.41,0.100,0.400,-0.427,34,Male,Online,4-year university degree
,1,,1,Yes	I put in a reasonable effort.,1,Malcolm Fraser,Kevin Rudd,0,0.50,0.50,0.50,0.50,0.50,0.50,0.50,,R,Shorten,1,1,,0.00,-0.22,0.425,0.375,0.600,0.700,0.433,0.400,0.500,0.500,0.500,0.400,0.300,0.300,0.40,0.65,0.42,-0.050,0.100,-0.033,17,Female,Lab,
,1,,1,Maybe	I was somewhat distracted.,1,Tony Abbott,Kevin Rudd,0,0.50,0.50,0.50,0.50,0.50,0.50,0.50,,R,Shorten,1,1,,0.00,-0.22,0.500,0.250,0.800,1.000,0.333,0.333,0.400,0.400,0.300,0.300,0.300,0.300,0.38,0.90,0.33,-0.250,0.200,0.000,19,Male,Lab,
Shy,1,No,1,No	I didn't really pay any attention.,0,Pauline Hanson,Kevin Rudd,1,0.50,0.50,0.50,0.50,0.50,0.50,0.50,,R,Shorten,1,1,,0.00,-0.22,0.500,0.400,0.500,0.400,0.333,0.300,0.000,0.000,0.500,0.500,0.500,0.400,0.45,0.45,0.32,-0.100,-0.100,-0.033,22,Female,Online,TAFE or other non-university qualification
Shy,1,No,1,Yes	I put in a reasonable effort.,1,Pauline Hanson,Kevin Rudd,1,0.50,0.50,0.50,0.50,0.50,0.50,0.50,,R,Shorten,1,1,,0.00,-0.22,0.600,0.525,1.000,1.000,0.520,0.510,0.500,0.500,0.560,0.530,0.500,0.500,0.56,1.00,0.52,-0.075,0.000,-0.010,56,Male,Online,TAFE or other non-university qualification
Shy,1,No,1,Yes	I put in a reasonable effort.,1,Pauline Hanson,Kevin Rudd,1,0.75,0.75,0.00,0.75,0.25,0.50,0.50,,R,Shorten,1,1,,0.00,-0.22,0.650,0.400,0.300,0.400,0.580,0.313,0.400,0.200,0.940,0.440,0.400,0.300,0.53,0.35,0.45,-0.250,0.100,-0.267,26,Male,Online,3-year university degree
,1,,1,Yes	I put in a reasonable effort.,1,Pauline Hanson,Kevin Rudd,1,0.50,0.50,0.75,0.25,0.50,0.50,0.50,,R,Shorten,1,1,,0.00,-0.22,0.250,0.000,0.600,1.000,0.467,0.400,0.400,0.400,0.400,0.400,0.600,0.400,0.13,0.80,0.43,-0.250,0.400,-0.067,17,Male,Lab,
,1,,1,Yes	I put in a reasonable effort.,1,Pauline Hanson,Kevin Rudd,1,0.50,0.50,0.50,0.50,0.50,0.50,0.50,,R,Shorten,1,1,,0.00,-0.22,0.475,0.075,0.600,0.900,0.500,0.367,0.500,0.300,0.500,0.400,0.500,0.400,0.28,0.75,0.43,-0.400,0.300,-0.133,31,Female,Lab,
Shy,1,,1,Yes	I put in a reasonable effort.,1,Malcolm Fraser,Peter Garrett,0,1.00,0.00,0.00,0.00,1.00,1.00,0.50,,R,Turnbull,1,1,,0.00,-0.22,0.100,0.075,0.000,0.900,0.000,0.093,0.000,0.000,0.000,0.080,0.000,0.200,0.09,0.45,0.05,-0.025,0.900,0.093,65,Female,Online,High school graduate
Shy,1,Yes,0,Yes	I put in a reasonable effort.,1,Pauline Hanson,Kevin Rudd,1,0.50,0.50,0.50,0.50,0.50,0.50,0.50,,R,Turnbull,1,1,,0.00,-0.22,0.500,0.600,0.500,0.600,0.507,0.543,0.500,0.600,0.520,0.530,0.500,0.500,0.55,0.55,0.53,0.100,0.100,0.037,29,Male,Online,4-year university degree
Shy,1,No,1,Maybe	I was somewhat distracted.,1,Pauline Hanson,Kevin Rudd,1,0.50,0.50,0.50,0.50,0.50,0.50,0.50,,R,Turnbull,1,1,,0.00,-0.22,0.525,0.000,0.500,1.000,0.500,0.247,0.500,0.200,0.500,0.340,0.500,0.200,0.26,0.75,0.37,-0.525,0.500,-0.253,18,Other / Prefer not to say,Online,High school graduate
Shy,1,No,1,Yes	I put in a reasonable effort.,1,Pauline Hanson,Kevin Rudd,1,0.50,0.50,0.50,0.50,0.50,0.50,0.50,,R,Turnbull,1,1,,0.00,-0.22,0.450,0.200,0.500,0.200,0.503,0.230,0.500,0.300,0.510,0.290,0.500,0.100,0.33,0.35,0.37,-0.250,-0.300,-0.273,44,Female,Online,High school graduate
Shy,1,No,1,Yes	I put in a reasonable effort.,1,Pauline Hanson,Kevin Rudd,1,0.50,0.50,0.50,0.50,0.50,0.50,0.50,,R,Turnbull,1,1,,0.00,-0.22,0.475,0.275,0.500,0.200,0.423,0.123,0.400,0.100,0.670,0.170,0.200,0.100,0.38,0.35,0.27,-0.200,-0.300,-0.300,30,Female,Online,High school graduate
Shy,1,No,1,Yes	I put in a reasonable effort.,1,Pauline Hanson,Kevin Rudd,1,0.50,0.75,0.50,0.25,0.50,0.50,0.50,,R,Turnbull,1,1,,0.00,-0.22,0.575,0.175,0.400,0.900,0.440,0.310,0.300,0.400,0.520,0.430,0.500,0.100,0.38,0.65,0.38,-0.400,0.500,-0.130,31,Female,Online,TAFE or other non-university qualification
Shy,1,,1,Yes	I put in a reasonable effort.,1,Pauline Hanson,Kevin Rudd,1,0.50,0.50,0.50,0.50,0.50,0.50,0.50,,R,Turnbull,1,1,,0.00,-0.22,0.550,0.000,0.500,1.000,0.717,0.740,0.700,0.900,0.750,0.820,0.700,0.500,0.28,0.75,0.73,-0.550,0.500,0.023,28,Male,Online,TAFE or other non-university qualification
Shy,1,,1,Yes	I put in a reasonable effort.,1,Pauline Hanson,Kevin Rudd,1,0.50,0.50,0.50,0.50,0.50,0.50,0.50,,R,Turnbull,1,1,,0.00,-0.22,0.650,0.125,0.600,0.800,0.577,0.313,0.600,0.200,0.430,0.340,0.700,0.400,0.39,0.70,0.45,-0.525,0.200,-0.263,22,Male,Online,TAFE or other non-university qualification
Shy,1,No,1,Yes	I put in a reasonable effort.,1,Pauline Hanson,Kevin Rudd,1,0.00,0.00,0.00,0.00,0.00,0.00,0.00,L,L,Shorten,1,4,L4,0.50,0.28,0.750,0.000,1.000,0.750,0.933,0.707,1.000,0.700,0.900,0.720,0.900,0.700,0.38,0.88,0.82,-0.750,-0.250,-0.227,59,Female,Online,High school graduate
Shy,1,No,1,Yes	I put in a reasonable effort.,1,Pauline Hanson,Kevin Rudd,1,0.00,0.00,0.00,0.00,0.00,0.00,0.00,L,L,Shorten,1,4,L4,0.50,0.28,0.625,0.000,0.900,1.000,0.803,0.803,1.000,1.000,0.710,0.710,0.700,0.700,0.31,0.95,0.80,-0.625,0.100,0.000,70,Female,Online,Postgraduate degree
Shy,1,,1,Yes	I put in a reasonable effort.,1,Pauline Hanson,Kevin Rudd,1,0.00,0.00,0.00,0.00,0.00,0.00,0.00,L,L,Shorten,1,4,L4,0.50,0.28,0.700,0.025,0.825,0.950,0.770,0.803,0.900,0.900,0.710,0.710,0.700,0.800,0.36,0.89,0.79,-0.675,0.125,0.033,22,Female,Online,High school graduate
Shy,1,,1,Yes	I put in a reasonable effort.,1,Pauline Hanson,Kevin Rudd,1,0.00,0.00,0.00,0.00,0.00,0.00,0.00,L,L,Shorten,1,4,L4,0.50,0.28,0.650,0.000,0.675,1.000,0.633,0.633,0.700,0.700,0.500,0.500,0.700,0.700,0.33,0.84,0.63,-0.650,0.325,0.000,32,Female,Online,Postgraduate degree
Shy,1,,1,Yes	I put in a reasonable effort.,1,Pauline Hanson,Kevin Rudd,1,0.00,0.00,0.00,0.00,0.00,0.00,0.00,L,L,Shorten,1,4,L4,0.50,0.28,0.725,0.050,0.775,0.950,0.833,0.800,0.900,0.800,0.800,0.800,0.800,0.800,0.39,0.86,0.82,-0.675,0.175,-0.033,48,Female,Online,Postgraduate degree
Shy,1,No,1,Yes	I put in a reasonable effort.,1,Pauline Hanson,Kevin Rudd,1,0.00,0.00,0.00,0.00,0.00,0.00,0.00,L,L,Turnbull,0,4,L4,0.50,0.28,0.200,0.150,0.225,0.400,0.037,0.067,0.000,0.000,0.010,0.000,0.100,0.200,0.18,0.31,0.05,-0.050,0.175,0.030,33,Male,Online,High school graduate
Shy,1,No,1,Yes	I put in a reasonable effort.,1,Pauline Hanson,Kevin Rudd,1,0.00,0.00,0.00,0.00,0.00,0.00,0.00,L,L,Turnbull,0,4,L4,0.50,0.28,0.200,0.050,0.550,0.500,0.000,0.100,0.000,0.000,0.000,0.000,0.000,0.300,0.13,0.53,0.05,-0.150,-0.050,0.100,73,Female,Online,High school graduate
Shy,1,No,1,Yes	I put in a reasonable effort.,1,Pauline Hanson,Kevin Rudd,1,0.00,0.00,0.00,0.00,0.00,0.00,0.00,L,L,Turnbull,0,4,L4,0.50,0.28,0.700,0.000,0.650,1.000,0.270,0.403,0.000,0.000,0.510,0.510,0.300,0.700,0.35,0.83,0.34,-0.700,0.350,0.133,53,Female,Online,TAFE or other non-university qualification
Shy,1,,1,Yes	I put in a reasonable effort.,1,Pauline Hanson,Kevin Rudd,1,0.00,0.00,0.00,0.00,0.00,0.00,0.00,L,L,Turnbull,0,4,L4,0.50,0.28,0.325,0.175,0.875,0.950,0.300,0.197,0.000,0.000,0.100,0.090,0.800,0.500,0.25,0.91,0.25,-0.150,0.075,-0.103,59,Male,Online,Some university, but no degree
Shy,1,,1,Yes	I put in a reasonable effort.,1,Pauline Hanson,Kevin Rudd,1,0.00,0.00,0.00,0.00,0.00,0.00,0.00,L,L,Turnbull,0,4,L4,0.50,0.28,0.450,0.000,0.500,1.000,0.000,0.137,0.000,0.000,0.000,0.010,0.000,0.400,0.23,0.75,0.07,-0.450,0.500,0.137,35,Female,Online,3-year university degree
Shy,1,,1,Yes	I put in a reasonable effort.,1,Pauline Hanson,Kevin Rudd,1,0.00,0.00,0.00,0.00,0.00,0.17,0.03,L,L,Turnbull,0,4,L4,0.47,0.25,0.275,0.150,0.200,0.500,0.167,0.183,0.000,0.000,0.200,0.250,0.300,0.300,0.21,0.35,0.18,-0.125,0.300,0.017,18,Male,Online,4-year university degree
,1,,1,Yes	I put in a reasonable effort.,1,Pauline Hanson,Kevin Rudd,1,0.00,0.00,0.00,0.25,0.00,0.00,0.04,L,L,Turnbull,0,4,L4,0.46,0.24,0.275,0.100,0.575,0.825,0.407,0.167,0.600,0.000,0.320,0.200,0.300,0.300,0.19,0.70,0.29,-0.175,0.250,-0.240,20,Female,Lab,
Shy,1,No,1,Yes	I put in a reasonable effort.,1,Pauline Hanson,Kevin Rudd,1,0.00,0.00,0.00,0.25,0.00,0.17,0.07,L,L,Shorten,1,4,L4,0.43,0.21,0.625,0.500,0.750,0.250,0.303,0.473,0.100,0.500,0.410,0.420,0.400,0.500,0.56,0.50,0.39,-0.125,-0.500,0.170,22,Female,Online,Some university, but no degree
Shy,1,,1,Yes	I put in a reasonable effort.,1,Pauline Hanson,Kevin Rudd,1,0.00,0.00,0.00,0.00,0.25,0.17,0.07,L,L,Shorten,1,4,L4,0.43,0.21,0.500,0.225,0.800,1.000,0.710,0.710,0.700,0.700,0.730,0.730,0.700,0.700,0.36,0.90,0.71,-0.275,0.200,0.000,71,Male,Online,4-year university degree
Shy,1,No,1,Yes	I put in a reasonable effort.,1,Pauline Hanson,Kevin Rudd,1,0.00,0.00,0.25,0.00,0.00,0.17,0.07,L,L,Turnbull,0,4,L4,0.43,0.21,0.025,0.000,0.750,0.950,0.263,0.163,0.200,0.000,0.190,0.090,0.400,0.400,0.01,0.85,0.21,-0.025,0.200,-0.100,31,Female,Online,3-year university degree
Shy,1,No,1,Yes	I put in a reasonable effort.,1,Pauline Hanson,Kevin Rudd,1,0.00,0.00,0.00,0.00,0.00,0.50,0.08,L,L,Turnbull,0,4,L4,0.42,0.20,0.000,0.000,0.250,0.250,0.000,0.000,0.000,0.000,0.000,0.000,0.000,0.000,0.00,0.25,0.00,0.000,0.000,0.000,63,Male,Online,TAFE or other non-university qualification
Shy,1,,1,Yes	I put in a reasonable effort.,1,Pauline Hanson,Kevin Rudd,1,0.00,0.00,0.00,0.50,0.00,0.00,0.08,L,L,Turnbull,0,4,L4,0.42,0.20,0.400,0.000,0.625,1.000,0.333,0.300,0.200,0.200,0.300,0.200,0.500,0.500,0.20,0.81,0.32,-0.400,0.375,-0.033,32,Female,Online,Some university, but no degree
,1,,1,Yes	I put in a reasonable effort.,1,Pauline Hanson,Kevin Rudd,1,0.00,0.00,0.00,0.25,0.00,0.33,0.10,L,L,Shorten,1,4,L4,0.40,0.18,0.700,0.100,0.600,0.900,0.497,0.347,0.400,0.200,0.490,0.340,0.600,0.500,0.40,0.75,0.42,-0.600,0.300,-0.150,20,Male,Lab,
Shy,1,No,1,Yes	I put in a reasonable effort.,1,Pauline Hanson,Kevin Rudd,1,0.25,0.00,0.00,0.00,0.25,0.17,0.11,L,L,Shorten,1,4,L4,0.39,0.17,0.450,0.000,0.800,1.000,0.773,0.687,0.700,0.700,0.720,0.660,0.900,0.700,0.23,0.90,0.73,-0.450,0.200,-0.087,58,Male,Online,3-year university degree
Shy,1,,1,Yes	I put in a reasonable effort.,1,Pauline Hanson,Kevin Rudd,1,0.00,0.00,0.00,0.50,0.00,0.17,0.11,L,L,Shorten,1,4,L4,0.39,0.17,0.775,0.000,0.500,1.000,0.707,0.627,0.700,0.600,0.720,0.580,0.700,0.700,0.39,0.75,0.67,-0.775,0.500,-0.080,19,Male,Online,Some university, but no degree
,1,,1,Yes	I put in a reasonable effort.,1,Pauline Hanson,Kevin Rudd,1,0.00,0.00,0.00,0.50,0.00,0.17,0.11,L,L,Shorten,1,4,L4,0.39,0.17,0.575,0.275,0.775,0.825,0.633,0.640,0.700,0.600,0.600,0.620,0.600,0.700,0.43,0.80,0.64,-0.300,0.050,0.007,19,Female,Lab,
Happy,0,No,1,Yes	I put in a reasonable effort.,1,Pauline Hanson,Kevin Rudd,1,0.00,0.00,0.00,0.50,0.00,0.17,0.11,L,L,Turnbull,0,4,L4,0.39,0.17,0.050,0.300,0.025,0.350,0.000,0.557,0.000,0.300,0.000,0.670,0.000,0.700,0.18,0.19,0.28,0.250,0.325,0.557,27,Male,Online,4-year university degree
Shy,1,,1,Maybe	I was somewhat distracted.,1,Pauline Hanson,Kevin Rudd,1,0.00,0.00,0.00,0.50,0.00,0.17,0.11,L,L,Turnbull,0,4,L4,0.39,0.17,0.475,0.250,0.450,0.875,0.357,0.467,0.100,0.500,0.470,0.500,0.500,0.400,0.36,0.66,0.41,-0.225,0.425,0.110,18,Female,Online,High school graduate
Shy,1,,1,Maybe	I was somewhat distracted.,1,Pauline Hanson,Kevin Rudd,1,0.00,0.00,0.00,0.50,0.00,0.17,0.11,L,L,Turnbull,0,4,L4,0.39,0.17,0.800,0.175,0.600,0.650,0.330,0.263,0.300,0.000,0.290,0.290,0.400,0.500,0.49,0.63,0.30,-0.625,0.050,-0.067,22,Female,Online,3-year university degree
Shy,1,No,1,Yes	I put in a reasonable effort.,1,Pauline Hanson,Kevin Rudd,1,0.25,0.00,0.00,0.00,0.25,0.17,0.11,L,L,Turnbull,0,4,L4,0.39,0.17,0.350,0.600,0.375,0.800,0.197,0.167,0.200,0.100,0.090,0.100,0.300,0.300,0.48,0.59,0.18,0.250,0.425,-0.030,63,Male,Online,High school graduate
Shy,1,No,1,Yes	I put in a reasonable effort.,1,Pauline Hanson,Kevin Rudd,1,0.00,0.00,0.25,0.25,0.00,0.17,0.11,L,L,Turnbull,0,4,L4,0.39,0.17,0.325,0.250,0.575,1.000,0.263,0.100,0.200,0.000,0.190,0.100,0.400,0.200,0.29,0.79,0.18,-0.075,0.425,-0.163,73,Male,Online,Postgraduate degree
Shy,1,,1,Yes	I put in a reasonable effort.,1,Pauline Hanson,Kevin Rudd,1,0.25,0.25,0.25,0.00,0.00,0.00,0.13,L,L,Turnbull,0,4,L4,0.38,0.16,0.350,0.525,0.275,0.500,0.167,0.363,0.000,0.700,0.100,0.190,0.400,0.200,0.44,0.39,0.27,0.175,0.225,0.197,32,Male,Online,4-year university degree
Shy,1,,1,Yes	I put in a reasonable effort.,1,Pauline Hanson,Kevin Rudd,1,0.00,0.00,0.00,0.50,0.00,0.33,0.14,L,L,Shorten,1,4,L4,0.36,0.14,0.500,0.900,0.500,0.900,0.503,0.747,0.500,0.900,0.510,0.640,0.500,0.700,0.70,0.70,0.63,0.400,0.400,0.243,35,Female,Online,Did not graduate from high school
,1,,1,Yes	I put in a reasonable effort.,1,Kristina Keneally,Kevin Rudd,0,0.00,0.00,0.25,0.50,0.00,0.17,0.15,L,L,Shorten,1,4,L4,0.35,0.13,0.525,0.250,0.650,1.000,0.400,0.437,0.300,0.500,0.500,0.510,0.400,0.300,0.39,0.83,0.42,-0.275,0.350,0.037,18,Female,Lab,
Shy,1,No,1,Yes	I put in a reasonable effort.,1,Pauline Hanson,Kevin Rudd,1,0.00,0.00,0.25,0.50,0.00,0.17,0.15,L,L,Shorten,1,4,L4,0.35,0.13,0.575,0.250,0.725,0.500,0.637,0.533,0.800,0.500,0.510,0.600,0.600,0.500,0.41,0.61,0.59,-0.325,-0.225,-0.103,57,Female,Online,Did not graduate from high school
Shy,1,No,1,Yes	I put in a reasonable effort.,1,Pauline Hanson,Kevin Rudd,1,0.00,0.00,0.00,0.50,0.25,0.17,0.15,L,L,Shorten,1,4,L4,0.35,0.13,0.700,0.000,0.700,0.700,0.783,0.717,1.000,1.000,0.650,0.650,0.700,0.500,0.35,0.70,0.75,-0.700,0.000,-0.067,68,Male,Online,4-year university degree
Shy,1,,1,Yes	I put in a reasonable effort.,1,Pauline Hanson,Kevin Rudd,1,0.00,0.00,0.25,0.25,0.25,0.17,0.15,L,L,Shorten,1,4,L4,0.35,0.13,0.500,0.050,0.800,1.000,0.803,0.783,0.900,0.900,0.710,0.750,0.800,0.700,0.28,0.90,0.79,-0.450,0.200,-0.020,51,Male,Online,TAFE or other non-university qualification
Shy,1,,1,Yes	I put in a reasonable effort.,1,Pauline Hanson,Kevin Rudd,1,0.00,0.00,0.25,0.25,0.25,0.17,0.15,L,L,Turnbull,0,4,L4,0.35,0.13,0.175,0.050,0.475,0.950,0.177,0.340,0.200,0.200,0.230,0.320,0.100,0.500,0.11,0.71,0.26,-0.125,0.475,0.163,20,Male,Online,Some university, but no degree
Shy,1,,1,Yes	I put in a reasonable effort.,1,Pauline Hanson,Kevin Rudd,1,0.00,0.00,0.50,0.25,0.00,0.17,0.15,L,L,Turnbull,0,4,L4,0.35,0.13,0.625,0.400,0.525,0.675,0.383,0.433,0.300,0.400,0.350,0.400,0.500,0.500,0.51,0.60,0.41,-0.225,0.150,0.050,27,Male,Online,Postgraduate degree
Shy,1,No,1,Yes	I put in a reasonable effort.,1,Pauline Hanson,Kevin Rudd,1,0.25,0.00,0.00,0.00,0.25,0.50,0.17,L,L,Turnbull,0,4,L4,0.33,0.11,0.075,0.025,0.275,0.575,0.000,0.033,0.000,0.000,0.000,0.000,0.000,0.100,0.05,0.43,0.02,-0.050,0.300,0.033,47,Female,Online,3-year university degree
Shy,1,,1,Yes	I put in a reasonable effort.,1,Pauline Hanson,Kevin Rudd,1,0.00,0.00,0.00,0.50,0.25,0.33,0.18,L,L,Shorten,1,4,L4,0.32,0.10,0.750,0.600,0.700,0.750,0.900,0.853,1.000,0.900,0.900,0.860,0.800,0.800,0.68,0.73,0.88,-0.150,0.050,-0.047,24,Male,Online,High school graduate
Shy,1,,1,Yes	I put in a reasonable effort.,1,Pauline Hanson,Kevin Rudd,1,0.25,0.25,0.25,0.00,0.00,0.33,0.18,L,L,Turnbull,0,4,L4,0.32,0.10,0.275,0.200,0.475,1.000,0.193,0.280,0.100,0.300,0.180,0.240,0.300,0.300,0.24,0.74,0.24,-0.075,0.525,0.087,19,Male,Online,Some university, but no degree
Shy,1,No,1,Yes	I put in a reasonable effort.,1,Pauline Hanson,Kevin Rudd,1,0.25,0.00,0.00,0.50,0.25,0.17,0.19,L,L,Shorten,1,4,L4,0.31,0.09,0.550,0.000,0.675,1.000,0.710,0.733,1.000,0.800,0.630,0.700,0.500,0.700,0.28,0.84,0.72,-0.550,0.325,0.023,19,Female,Online,High school graduate
Shy,1,,1,Yes	I put in a reasonable effort.,1,Pauline Hanson,Kevin Rudd,1,0.25,0.25,0.25,0.00,0.25,0.17,0.19,L,L,Shorten,1,4,L4,0.31,0.09,0.575,0.000,0.850,1.000,0.680,0.697,0.700,0.800,0.640,0.690,0.700,0.600,0.29,0.93,0.69,-0.575,0.150,0.017,37,Female,Online,3-year university degree
Shy,1,,1,Yes	I put in a reasonable effort.,1,Robert Menzies,Kevin Rudd,0,0.00,0.00,0.00,1.00,0.00,0.17,0.19,L,L,Turnbull,0,4,L4,0.31,0.09,0.700,0.625,0.625,0.400,0.570,0.533,0.400,0.500,0.610,0.600,0.700,0.500,0.66,0.51,0.55,-0.075,-0.225,-0.037,28,Male,Online,Postgraduate degree
Shy,1,No,1,Yes	I put in a reasonable effort.,1,Pauline Hanson,Kevin Rudd,1,0.00,0.00,0.25,0.75,0.00,0.17,0.19,L,L,Turnbull,0,4,L4,0.31,0.09,0.275,0.050,0.475,0.775,0.473,0.230,0.300,0.200,0.320,0.190,0.800,0.300,0.16,0.63,0.35,-0.225,0.300,-0.243,60,Male,Online,TAFE or other non-university qualification
,1,,1,Yes	I put in a reasonable effort.,1,Pauline Hanson,Kevin Rudd,1,0.00,0.25,0.75,0.00,0.00,0.17,0.19,L,L,Turnbull,0,4,L4,0.31,0.09,0.275,0.000,0.500,1.000,0.250,0.290,0.100,0.200,0.150,0.170,0.500,0.500,0.14,0.75,0.27,-0.275,0.500,0.040,19,Female,Lab,
Shy,1,,1,Yes	I put in a reasonable effort.,1,Pauline Hanson,Kevin Rudd,1,0.25,0.00,0.00,0.25,0.25,0.50,0.21,L,L,Turnbull,0,4,L4,0.29,0.07,0.275,0.200,0.300,0.575,0.157,0.243,0.100,0.100,0.170,0.130,0.200,0.500,0.24,0.44,0.20,-0.075,0.275,0.087,70,Female,Online,Did not graduate from high school
Shy,1,,1,Yes	I put in a reasonable effort.,1,Pauline Hanson,Kevin Rudd,1,0.25,0.00,0.25,0.25,0.25,0.33,0.22,L,L,Shorten,1,4,L4,0.28,0.06,0.600,0.125,0.675,0.800,0.550,0.600,0.500,0.600,0.550,0.600,0.600,0.600,0.36,0.74,0.58,-0.475,0.125,0.050,39,Female,Online,Postgraduate degree
,1,,1,Yes	I put in a reasonable effort.,1,Pauline Hanson,Kevin Rudd,1,0.25,0.00,0.25,0.25,0.25,0.33,0.22,L,L,Shorten,1,4,L4,0.28,0.06,0.300,0.000,0.575,0.950,0.440,0.317,0.600,0.300,0.420,0.250,0.300,0.400,0.15,0.76,0.38,-0.300,0.375,-0.123,18,Male,Lab,
,1,,1,Yes	I put in a reasonable effort.,1,Pauline Hanson,Kevin Rudd,1,0.25,0.00,0.25,0.50,0.00,0.33,0.22,L,L,Shorten,1,4,L4,0.28,0.06,0.500,0.250,0.450,0.975,0.557,0.590,0.600,0.600,0.570,0.570,0.500,0.600,0.38,0.71,0.57,-0.250,0.525,0.033,19,Male,Lab,
,1,,1,Yes	I put in a reasonable effort.,1,Pauline Hanson,Kevin Rudd,1,0.25,0.25,0.25,0.00,0.25,0.33,0.22,L,L,Turnbull,0,4,L4,0.28,0.06,0.450,0.125,0.625,1.000,0.267,0.467,0.200,0.300,0.300,0.600,0.300,0.500,0.29,0.81,0.37,-0.325,0.375,0.200,19,Male,Lab,
Shy,1,,1,Yes	I put in a reasonable effort.,1,Pauline Hanson,Kevin Rudd,1,0.25,0.25,0.25,0.25,,0.17,0.23,L,L,Shorten,1,4,L4,0.27,0.05,0.625,0.375,0.525,0.675,0.707,0.707,0.700,0.700,0.720,0.720,0.700,0.700,0.50,0.60,0.71,-0.250,0.150,0.000,30,Female,Online,Did not graduate from high school
Shy,1,,1,Yes	I put in a reasonable effort.,1,Malcolm Fraser,Barnaby Joyce,0,0.25,0.25,0.25,0.50,0.00,0.17,0.24,L,L,Shorten,1,4,L4,0.26,0.05,0.475,0.025,0.500,0.850,0.433,0.730,0.500,0.800,0.500,0.690,0.300,0.700,0.25,0.68,0.58,-0.450,0.350,0.297,28,Female,Online,Postgraduate degree
Shy,1,,1,Yes	I put in a reasonable effort.,1,Pauline Hanson,Kevin Rudd,1,0.25,0.25,0.75,0.00,0.00,0.17,0.24,L,L,Shorten,1,4,L4,0.26,0.05,0.475,0.000,0.650,0.950,0.700,0.633,0.700,0.700,0.700,0.700,0.700,0.500,0.24,0.80,0.67,-0.475,0.300,-0.067,31,Male,Online,Some university, but no degree
Shy,1,,1,Yes	I put in a reasonable effort.,1,Pauline Hanson,Kevin Rudd,1,0.25,0.25,0.25,0.25,0.25,0.17,0.24,L,L,Shorten,1,4,L4,0.26,0.05,0.775,0.250,0.800,0.850,0.883,0.883,1.000,1.000,0.850,0.850,0.800,0.800,0.51,0.83,0.88,-0.525,0.050,0.000,38,Male,Online,4-year university degree
Shy,1,,1,Yes	I put in a reasonable effort.,1,Pauline Hanson,Kevin Rudd,1,0.00,0.75,0.25,0.25,0.00,0.17,0.24,L,L,Shorten,1,4,L4,0.26,0.05,0.525,0.175,0.675,0.950,0.703,0.703,0.700,0.700,0.710,0.710,0.700,0.700,0.35,0.81,0.70,-0.350,0.275,0.000,39,Male,Online,Postgraduate degree
,1,,1,Yes	I put in a reasonable effort.,1,Pauline Hanson,Kevin Rudd,1,0.00,0.25,0.25,0.50,0.25,0.17,0.24,L,L,Shorten,1,4,L4,0.26,0.05,0.650,0.000,0.650,1.000,0.603,0.660,0.700,0.700,0.710,0.780,0.400,0.500,0.33,0.83,0.63,-0.650,0.350,0.057,19,Female,Lab,
,1,,1,Yes	I put in a reasonable effort.,1,Pauline Hanson,Kevin Rudd,1,0.25,0.00,0.25,0.50,0.25,0.17,0.24,L,L,Shorten,1,4,L4,0.26,0.05,0.700,0.000,0.725,1.000,0.727,0.367,0.800,0.400,0.780,0.300,0.600,0.400,0.35,0.86,0.55,-0.700,0.275,-0.360,19,Female,Lab,
Shy,1,No,1,Yes	I put in a reasonable effort.,1,Pauline Hanson,Kevin Rudd,1,0.25,0.25,0.50,0.25,0.00,0.17,0.24,L,L,Turnbull,0,4,L4,0.26,0.05,0.400,0.425,0.400,0.500,0.400,0.443,0.300,0.400,0.400,0.430,0.500,0.500,0.41,0.45,0.42,0.025,0.100,0.043,19,Female,Online,High school graduate
Shy,1,,1,Yes	I put in a reasonable effort.,1,Pauline Hanson,Kevin Rudd,1,0.25,0.25,0.25,0.25,0.25,0.17,0.24,L,L,Turnbull,0,4,L4,0.26,0.05,0.550,0.175,0.650,0.800,0.367,0.267,0.300,0.200,0.300,0.200,0.500,0.400,0.36,0.73,0.32,-0.375,0.150,-0.100,40,Male,Online,High school graduate
Shy,1,,1,Yes	I put in a reasonable effort.,1,Pauline Hanson,Kevin Rudd,1,0.25,0.25,0.50,0.25,0.00,0.17,0.24,L,L,Turnbull,0,4,L4,0.26,0.05,0.575,0.075,0.625,0.925,0.683,0.683,0.700,0.700,0.650,0.650,0.700,0.700,0.33,0.78,0.68,-0.500,0.300,0.000,38,Female,Online,4-year university degree
Shy,1,,1,Yes	I put in a reasonable effort.,1,Pauline Hanson,Kevin Rudd,1,0.00,0.50,0.50,0.50,0.00,0.00,0.25,L,L,Shorten,1,4,L4,0.25,0.03,0.675,0.000,0.700,0.925,0.670,0.603,0.700,0.600,0.710,0.610,0.600,0.600,0.34,0.81,0.64,-0.675,0.225,-0.067,25,Female,Online,Some university, but no degree
Confused,0,No,1,Maybe	I was somewhat distracted.,1,Pauline Hanson,Kevin Rudd,1,0.25,0.00,0.00,0.50,0.25,0.50,0.25,L,L,Turnbull,0,4,L4,0.25,0.03,0.275,0.450,0.225,0.525,0.117,0.553,0.000,0.300,0.350,0.460,0.000,0.900,0.36,0.38,0.34,0.175,0.300,0.437,25,Female,Online,Did not graduate from high school
Shy,1,,1,Yes	I put in a reasonable effort.,1,Pauline Hanson,Kevin Rudd,1,0.25,0.25,0.25,0.50,0.25,0.00,0.25,L,L,Turnbull,0,4,L4,0.25,0.03,0.450,0.250,0.475,0.600,0.533,0.533,0.300,0.300,0.600,0.600,0.700,0.700,0.35,0.54,0.53,-0.200,0.125,0.000,38,Male,Online,Postgraduate degree
Shy,1,,1,Yes	I put in a reasonable effort.,1,Pauline Hanson,Kevin Rudd,1,0.25,0.00,0.25,0.50,0.25,0.33,0.26,L,L,Turnbull,0,4,L4,0.24,0.02,0.275,0.125,0.525,1.000,0.130,0.093,0.000,0.000,0.190,0.080,0.200,0.200,0.20,0.76,0.11,-0.150,0.475,-0.037,35,Male,Online,High school graduate
Shy,1,,1,Yes	I put in a reasonable effort.,1,Pauline Hanson,Kevin Rudd,1,0.25,0.25,0.25,0.25,0.25,0.33,0.26,L,L,Turnbull,0,4,L4,0.24,0.02,0.275,0.050,0.600,0.825,0.433,0.283,0.500,0.300,0.400,0.350,0.400,0.200,0.16,0.71,0.36,-0.225,0.225,-0.150,34,Male,Online,3-year university degree
Shy,1,No,1,Yes	I put in a reasonable effort.,1,Pauline Hanson,Kevin Rudd,1,0.00,0.00,0.00,0.00,1.00,0.67,0.28,L,L,Turnbull,0,4,L4,0.22,0.00,0.000,0.000,0.275,0.725,0.030,0.027,0.000,0.000,0.090,0.080,0.000,0.000,0.00,0.50,0.03,0.000,0.450,-0.003,73,Male,Online,Did not graduate from high school
Shy,1,,1,Yes	I put in a reasonable effort.,1,Pauline Hanson,Kevin Rudd,1,0.50,0.50,0.25,0.00,0.25,0.17,0.28,L,L,Turnbull,0,4,L4,0.22,0.00,0.225,0.350,0.250,0.400,0.323,0.237,0.300,0.200,0.370,0.310,0.300,0.200,0.29,0.33,0.28,0.125,0.150,-0.087,34,Male,Online,4-year university degree
,1,,1,Yes	I put in a reasonable effort.,1,Pauline Hanson,Kevin Rudd,1,0.25,0.25,0.25,0.50,0.25,0.17,0.28,L,L,Turnbull,0,4,L4,0.22,0.00,0.450,0.050,0.525,0.875,0.417,0.433,0.300,0.400,0.450,0.500,0.500,0.400,0.25,0.70,0.43,-0.400,0.350,0.017,19,Male,Lab,
,1,,1,Yes	I put in a reasonable effort.,1,Pauline Hanson,Kevin Rudd,1,0.25,0.25,0.25,0.50,0.25,0.17,0.28,L,L,Turnbull,0,4,L4,0.22,0.00,0.500,0.250,0.500,1.000,0.317,0.350,0.300,0.300,0.250,0.250,0.400,0.500,0.38,0.75,0.33,-0.250,0.500,0.033,19,Female,Lab,
Shy,1,,1,Yes	I put in a reasonable effort.,1,Pauline Hanson,Kevin Rudd,1,0.25,0.25,0.25,0.75,0.25,0.00,0.29,L,L,Shorten,1,4,L4,0.21,-0.01,0.500,0.200,0.600,0.650,0.577,0.317,0.500,0.200,0.630,0.350,0.600,0.400,0.35,0.63,0.45,-0.300,0.050,-0.260,18,Female,Online,TAFE or other non-university qualification
Shy,1,No,1,Yes	I put in a reasonable effort.,1,Pauline Hanson,Kevin Rudd,1,0.25,0.25,0.25,0.50,0.25,0.33,0.31,L,L,Shorten,1,4,L4,0.19,-0.02,0.650,0.425,0.600,0.500,0.710,0.600,0.800,0.700,0.630,0.600,0.700,0.500,0.54,0.55,0.66,-0.225,-0.100,-0.110,48,Male,Online,High school graduate
,1,,1,Yes	I put in a reasonable effort.,1,Pauline Hanson,Kevin Rudd,1,0.25,0.25,0.25,0.50,0.25,0.33,0.31,L,L,Shorten,1,4,L4,0.19,-0.02,0.425,0.000,0.600,1.000,0.517,0.607,0.500,0.600,0.550,0.620,0.500,0.600,0.21,0.80,0.56,-0.425,0.400,0.090,21,Female,Lab,
,1,,1,Yes	I put in a reasonable effort.,1,Malcolm Fraser,Kevin Rudd,0,0.25,0.25,0.25,0.50,0.25,0.33,0.31,L,L,Turnbull,0,4,L4,0.19,-0.02,0.425,0.025,0.200,0.750,0.033,0.133,0.000,0.100,0.000,0.000,0.100,0.300,0.23,0.48,0.08,-0.400,0.550,0.100,18,Female,Lab,
Shy,1,No,1,Yes	I put in a reasonable effort.,1,Pauline Hanson,Kevin Rudd,1,0.25,0.25,0.25,0.50,0.25,0.33,0.31,L,L,Turnbull,0,4,L4,0.19,-0.02,0.225,0.150,0.650,0.850,0.117,0.047,0.000,0.000,0.050,0.040,0.300,0.100,0.19,0.75,0.08,-0.075,0.200,-0.070,54,Male,Online,TAFE or other non-university qualification
,1,,1,Yes	I put in a reasonable effort.,1,Pauline Hanson,Kevin Rudd,1,0.50,0.00,0.25,0.25,0.75,0.17,0.32,L,L,Shorten,1,4,L4,0.18,-0.04,0.400,0.150,0.500,0.275,0.267,0.200,0.300,0.200,0.300,0.200,0.200,0.200,0.28,0.39,0.23,-0.250,-0.225,-0.067,39,Female,Lab,
Comfortable,0,No,1,Yes	I put in a reasonable effort.,1,Pauline Hanson,Kevin Rudd,1,0.00,0.25,0.25,1.00,0.25,0.17,0.32,L,L,Turnbull,0,4,L4,0.18,-0.04,0.800,0.400,0.800,0.675,0.707,0.767,0.500,0.800,0.820,0.800,0.800,0.700,0.60,0.74,0.74,-0.400,-0.125,0.060,65,Male,Online,High school graduate
,1,,1,Maybe	I was somewhat distracted.,1,Pauline Hanson,Kevin Rudd,1,0.25,0.25,0.50,0.50,0.25,0.17,0.32,L,L,Turnbull,0,4,L4,0.18,-0.04,0.450,0.425,0.525,0.600,0.537,0.323,0.500,0.300,0.510,0.370,0.600,0.300,0.44,0.56,0.43,-0.025,0.075,-0.213,19,Female,Lab,
Shy,1,No,1,Yes	I put in a reasonable effort.,1,Pauline Hanson,Kevin Rudd,1,0.25,0.25,0.25,0.75,0.25,0.17,0.32,L,L,Turnbull,0,4,L4,0.18,-0.04,0.575,0.000,0.625,1.000,0.267,0.300,0.300,0.300,0.300,0.300,0.200,0.300,0.29,0.81,0.28,-0.575,0.375,0.033,24,Female,Online,High school graduate
Shy,1,,1,Yes	I put in a reasonable effort.,1,Pauline Hanson,Kevin Rudd,1,0.25,0.25,0.50,0.25,0.25,0.50,0.33,L,L,Shorten,1,4,L4,0.17,-0.05,0.675,0.600,0.725,0.900,0.573,0.737,0.500,0.800,0.520,0.710,0.700,0.700,0.64,0.81,0.66,-0.075,0.175,0.163,61,Female,Online,3-year university degree
Shy,1,No,1,Yes	I put in a reasonable effort.,1,Pauline Hanson,Kevin Rudd,1,0.50,0.00,0.25,0.50,0.25,0.50,0.33,L,L,Turnbull,0,4,L4,0.17,-0.05,0.400,0.200,0.450,0.800,0.173,0.237,0.100,0.100,0.220,0.210,0.200,0.400,0.30,0.63,0.21,-0.200,0.350,0.063,36,Male,Online,High school graduate
Shy,1,No,1,Yes	I put in a reasonable effort.,1,Pauline Hanson,Kevin Rudd,1,0.25,0.25,0.25,0.50,0.25,0.50,0.33,L,L,Turnbull,0,4,L4,0.17,-0.05,0.350,0.400,0.525,0.600,0.367,0.437,0.300,0.400,0.400,0.410,0.400,0.500,0.38,0.56,0.40,0.050,0.075,0.070,45,Male,Online,3-year university degree
Shy,1,,1,Maybe	I was somewhat distracted.,1,Pauline Hanson,Kevin Rudd,1,0.25,0.25,0.75,0.25,0.25,0.33,0.35,L,L,Shorten,1,4,L4,0.15,-0.07,0.725,0.700,0.700,0.725,0.470,0.563,0.600,0.700,0.310,0.390,0.500,0.600,0.71,0.71,0.52,-0.025,0.025,0.093,30,Female,Online,Some university, but no degree
Shy,1,No,1,Yes	I put in a reasonable effort.,1,Pauline Hanson,Kevin Rudd,1,0.25,0.25,0.75,0.25,0.25,0.33,0.35,L,L,Shorten,1,4,L4,0.15,-0.07,0.625,0.250,0.725,0.875,0.563,0.590,0.500,0.600,0.590,0.570,0.600,0.600,0.44,0.80,0.58,-0.375,0.150,0.027,56,Male,Online,TAFE or other non-university qualification
Shy,1,No,1,Yes	I put in a reasonable effort.,1,Pauline Hanson,Kevin Rudd,1,0.25,0.50,0.50,0.25,0.25,0.33,0.35,L,L,Shorten,1,4,L4,0.15,-0.07,0.375,0.050,0.475,0.875,0.133,0.167,0.100,0.100,0.100,0.100,0.200,0.300,0.21,0.68,0.15,-0.325,0.400,0.033,60,Male,Online,Postgraduate degree
Shy,1,,1,Yes	I put in a reasonable effort.,1,Pauline Hanson,Kevin Rudd,1,0.75,0.00,0.25,0.50,0.25,0.33,0.35,L,L,Shorten,1,4,L4,0.15,-0.07,0.575,0.225,0.600,0.750,0.337,0.317,0.200,0.200,0.510,0.450,0.300,0.300,0.40,0.68,0.33,-0.350,0.150,-0.020,34,Female,Online,3-year university degree
Shy,1,,1,Yes	I put in a reasonable effort.,1,Pauline Hanson,Kevin Rudd,1,0.25,0.50,0.25,0.50,0.25,0.33,0.35,L,L,Shorten,1,4,L4,0.15,-0.07,0.725,0.250,0.650,1.000,0.667,0.593,0.600,0.600,0.600,0.580,0.800,0.600,0.49,0.83,0.63,-0.475,0.350,-0.073,29,Male,Online,3-year university degree
,1,,1,Yes	I put in a reasonable effort.,1,Pauline Hanson,Kevin Rudd,1,0.25,0.00,0.75,0.50,0.25,0.33,0.35,L,L,Shorten,1,4,L4,0.15,-0.07,0.550,0.050,0.650,0.825,0.633,0.633,0.600,0.600,0.600,0.600,0.700,0.700,0.30,0.74,0.63,-0.500,0.175,0.000,27,Male,Lab,
Shy,1,No,1,Yes	I put in a reasonable effort.,1,Pauline Hanson,Kevin Rudd,1,0.25,0.25,0.75,0.25,0.25,0.33,0.35,L,L,Turnbull,0,4,L4,0.15,-0.07,0.250,0.175,0.275,1.000,0.180,0.297,0.300,0.000,0.140,0.090,0.100,0.800,0.21,0.64,0.24,-0.075,0.725,0.117,62,Female,Online,TAFE or other non-university qualification
,1,,1,Yes	I put in a reasonable effort.,1,Pauline Hanson,Kevin Rudd,1,0.25,0.25,1.00,0.25,0.25,0.17,0.36,L,L,Shorten,1,4,L4,0.14,-0.08,0.550,0.025,0.600,0.950,0.827,0.767,1.000,0.800,0.780,0.800,0.700,0.700,0.29,0.78,0.80,-0.525,0.350,-0.060,28,Male,Lab,
,1,,1,Yes	I put in a reasonable effort.,1,Pauline Hanson,Kevin Rudd,1,0.25,0.25,0.75,0.50,0.25,0.17,0.36,L,L,Turnbull,0,4,L4,0.14,-0.08,0.400,0.050,0.550,1.000,0.430,0.483,0.400,0.500,0.390,0.450,0.500,0.500,0.23,0.78,0.46,-0.350,0.450,0.053,22,Female,Lab,
,1,,1,Yes	I put in a reasonable effort.,1,Pauline Hanson,Kevin Rudd,1,0.50,0.25,0.50,0.50,0.25,0.17,0.36,L,L,Turnbull,0,4,L4,0.14,-0.08,0.475,0.450,0.500,0.600,0.283,0.317,0.200,0.300,0.150,0.150,0.500,0.500,0.46,0.55,0.30,-0.025,0.100,0.033,19,Male,Lab,
Shy,1,No,1,Yes	I put in a reasonable effort.,1,Pauline Hanson,Kevin Rudd,1,0.25,0.50,0.50,0.25,0.25,0.50,0.38,L,L,Shorten,1,4,L4,0.13,-0.09,0.500,0.000,0.575,1.000,0.467,0.500,0.500,0.500,0.500,0.500,0.400,0.500,0.25,0.79,0.48,-0.500,0.425,0.033,58,Male,Online,High school graduate
Comfortable,0,No,1,Yes	I put in a reasonable effort.,1,Pauline Hanson,Kevin Rudd,1,0.25,0.50,0.50,0.25,0.25,0.50,0.38,L,L,Turnbull,0,4,L4,0.13,-0.09,0.675,0.575,0.650,0.625,0.767,0.773,0.800,0.800,0.700,0.720,0.800,0.800,0.63,0.64,0.77,-0.100,-0.025,0.007,22,Male,Online,High school graduate
Shy,1,No,1,Yes	I put in a reasonable effort.,1,Pauline Hanson,Kevin Rudd,1,0.25,0.25,0.75,0.25,0.25,0.50,0.38,L,L,Turnbull,0,4,L4,0.13,-0.09,0.650,0.000,0.725,1.000,0.617,0.617,0.500,0.500,0.650,0.650,0.700,0.700,0.33,0.86,0.62,-0.650,0.275,0.000,70,Male,Online,TAFE or other non-university qualification
Shy,1,No,1,Yes	I put in a reasonable effort.,1,Pauline Hanson,Kevin Rudd,1,1.00,0.00,0.00,0.00,0.25,1.00,0.38,L,L,Turnbull,0,4,L4,0.13,-0.09,0.000,0.075,0.000,0.050,0.000,0.000,0.000,0.000,0.000,0.000,0.000,0.000,0.04,0.03,0.00,0.075,0.050,0.000,33,Male,Online,4-year university degree
Shy,1,,1,Yes	I put in a reasonable effort.,1,Pauline Hanson,Kevin Rudd,1,0.25,0.50,0.25,0.50,0.25,0.50,0.38,L,L,Turnbull,0,4,L4,0.13,-0.09,0.275,0.250,0.550,1.000,0.330,0.333,0.300,0.300,0.290,0.300,0.400,0.400,0.26,0.78,0.33,-0.025,0.450,0.003,75,Male,Online,TAFE or other non-university qualification
,1,,1,Yes	I put in a reasonable effort.,1,Peter Dutton,Kevin Rudd,0,0.25,0.25,0.75,0.50,0.25,0.33,0.39,L,L,Shorten,1,4,L4,0.11,-0.11,0.575,0.550,0.525,0.950,0.503,0.700,0.500,0.800,0.510,0.600,0.500,0.700,0.56,0.74,0.60,-0.025,0.425,0.197,20,Female,Lab,
Shy,1,No,1,Yes	I put in a reasonable effort.,1,Pauline Hanson,Kevin Rudd,1,0.25,0.25,0.75,0.50,0.25,0.33,0.39,L,L,Shorten,1,4,L4,0.11,-0.11,0.500,0.000,0.725,0.500,0.663,0.630,0.700,0.600,0.690,0.690,0.600,0.600,0.25,0.61,0.65,-0.500,-0.225,-0.033,19,Male,Online,Some university, but no degree
Shy,1,No,1,Yes	I put in a reasonable effort.,1,Pauline Hanson,Kevin Rudd,1,0.25,0.25,0.50,0.75,0.25,0.33,0.39,L,L,Shorten,1,4,L4,0.11,-0.11,0.775,0.400,1.000,1.000,0.570,0.570,0.600,0.600,0.610,0.610,0.500,0.500,0.59,1.00,0.57,-0.375,0.000,0.000,55,Male,Online,Some university, but no degree
,1,,1,Yes	I put in a reasonable effort.,1,Pauline Hanson,Kevin Rudd,1,0.25,0.25,0.75,0.50,0.25,0.33,0.39,L,L,Shorten,1,4,L4,0.11,-0.11,0.550,0.000,0.625,1.000,0.567,0.487,0.500,0.500,0.500,0.360,0.700,0.600,0.28,0.81,0.53,-0.550,0.375,-0.080,19,Female,Lab,
Shy,1,No,1,Maybe	I was somewhat distracted.,1,Pauline Hanson,Kevin Rudd,1,0.50,0.50,0.50,0.25,0.25,0.33,0.39,L,L,Turnbull,0,4,L4,0.11,-0.11,0.625,0.500,0.550,1.000,0.537,0.567,0.600,0.600,0.510,0.600,0.500,0.500,0.56,0.78,0.55,-0.125,0.450,0.030,30,Male,Online,Did not graduate from high school
Shy,1,No,1,Yes	I put in a reasonable effort.,1,Pauline Hanson,Kevin Rudd,1,0.25,0.25,0.50,0.75,0.25,0.33,0.39,L,L,Turnbull,0,4,L4,0.11,-0.11,0.350,0.125,0.500,0.875,0.223,0.217,0.200,0.200,0.170,0.150,0.300,0.300,0.24,0.69,0.22,-0.225,0.375,-0.007,21,Female,Online,TAFE or other non-university qualification
,1,,1,Yes	I put in a reasonable effort.,1,Pauline Hanson,Kevin Rudd,1,0.25,0.25,0.75,0.50,0.25,0.33,0.39,L,L,Turnbull,0,4,L4,0.11,-0.11,0.500,0.175,0.475,0.850,0.387,0.443,0.300,0.400,0.460,0.430,0.400,0.500,0.34,0.66,0.42,-0.325,0.375,0.057,18,Female,Lab,
Shy,1,,1,Yes	I put in a reasonable effort.,1,Pauline Hanson,Kevin Rudd,1,0.50,0.00,1.00,0.50,0.25,0.17,0.40,L,L,Shorten,1,4,L4,0.10,-0.12,0.700,0.375,0.700,0.750,0.567,0.433,0.500,0.300,0.500,0.500,0.700,0.500,0.54,0.73,0.50,-0.325,0.050,-0.133,52,Female,Online,3-year university degree
Shy,1,No,1,Yes	I put in a reasonable effort.,1,Pauline Hanson,Kevin Rudd,1,0.50,0.50,0.25,0.25,0.25,0.67,0.40,L,L,Turnbull,0,4,L4,0.10,-0.12,0.500,0.825,0.450,0.475,0.667,0.627,0.600,0.800,0.700,0.680,0.700,0.400,0.66,0.46,0.65,0.325,0.025,-0.040,19,Male,Online,TAFE or other non-university qualification
Shy,1,No,1,Yes	I put in a reasonable effort.,1,Pauline Hanson,Kevin Rudd,1,0.25,0.50,0.75,0.25,0.25,0.50,0.42,L,L,Shorten,1,4,L4,0.08,-0.14,0.400,0.550,0.475,0.700,0.167,0.200,0.000,0.000,0.200,0.200,0.300,0.400,0.48,0.59,0.18,0.150,0.225,0.033,47,Female,Online,TAFE or other non-university qualification
Happy,0,No,1,Yes	I put in a reasonable effort.,1,Pauline Hanson,Kevin Rudd,1,0.50,0.50,0.25,0.50,0.25,0.50,0.42,L,L,Turnbull,0,4,L4,0.08,-0.14,0.725,0.700,0.750,0.700,0.810,0.717,0.800,0.700,0.730,0.750,0.900,0.700,0.71,0.73,0.76,-0.025,-0.050,-0.093,26,Male,Online,4-year university degree
Shy,1,,1,Maybe	I was somewhat distracted.,1,Pauline Hanson,Kevin Rudd,1,0.25,0.25,0.50,0.50,0.50,0.50,0.42,L,L,Turnbull,0,4,L4,0.08,-0.14,0.375,0.075,0.775,0.750,0.487,0.560,0.400,0.500,0.460,0.480,0.600,0.700,0.23,0.76,0.52,-0.300,-0.025,0.073,21,Male,Online,4-year university degree
Shy,1,No,1,Yes	I put in a reasonable effort.,1,Pauline Hanson,Kevin Rudd,1,0.50,0.50,0.00,0.50,0.50,0.50,0.42,L,L,Turnbull,0,4,L4,0.08,-0.14,0.600,0.675,0.500,0.575,0.297,0.423,0.100,0.500,0.290,0.270,0.500,0.500,0.64,0.54,0.36,0.075,0.075,0.127,38,Female,Online,TAFE or other non-university qualification
Shy,1,,1,Yes	I put in a reasonable effort.,1,Pauline Hanson,Kevin Rudd,1,0.25,0.25,0.50,0.75,0.25,0.50,0.42,L,L,Turnbull,0,4,L4,0.08,-0.14,0.350,0.250,0.650,0.750,0.603,0.433,0.600,0.500,0.510,0.500,0.700,0.300,0.30,0.70,0.52,-0.100,0.100,-0.170,34,Male,Online,High school graduate
Shy,1,,1,Yes	I put in a reasonable effort.,1,Pauline Hanson,Kevin Rudd,1,0.50,0.50,0.00,0.50,0.50,0.50,0.42,L,L,Turnbull,0,4,L4,0.08,-0.14,0.250,0.000,0.250,0.250,0.000,0.000,0.000,0.000,0.000,0.000,0.000,0.000,0.13,0.25,0.00,-0.250,0.000,0.000,59,Female,Online,TAFE or other non-university qualification
Comfortable,0,,1,Yes	I put in a reasonable effort.,1,Pauline Hanson,Kevin Rudd,1,0.50,0.50,0.50,0.50,0.25,0.33,0.43,L,R,Shorten,1,4,L4,0.07,-0.15,0.350,0.600,0.325,0.125,0.583,0.503,0.600,0.500,0.650,0.510,0.500,0.500,0.48,0.23,0.54,0.250,-0.200,-0.080,27,Male,Online,4-year university degree
Shy,1,,1,Yes	I put in a reasonable effort.,1,Pauline Hanson,Kevin Rudd,1,0.25,0.50,0.75,0.50,0.25,0.33,0.43,L,R,Shorten,1,4,L4,0.07,-0.15,0.675,0.150,0.700,0.950,0.603,0.397,0.700,0.300,0.610,0.290,0.500,0.600,0.41,0.83,0.50,-0.525,0.250,-0.207,37,Male,Online,Some university, but no degree
Shy,1,,1,Yes	I put in a reasonable effort.,1,Pauline Hanson,Kevin Rudd,1,0.25,0.25,1.00,0.50,0.25,0.33,0.43,L,R,Shorten,1,4,L4,0.07,-0.15,0.425,0.000,0.675,0.700,0.550,0.583,0.600,0.600,0.550,0.550,0.500,0.600,0.21,0.69,0.57,-0.425,0.025,0.033,21,Male,Online,3-year university degree
Shy,1,No,1,Maybe	I was somewhat distracted.,1,Pauline Hanson,Kevin Rudd,1,0.25,0.75,0.50,0.50,0.25,0.33,0.43,L,R,Turnbull,0,4,L4,0.07,-0.15,0.500,0.675,0.475,0.825,0.473,0.590,0.400,0.500,0.420,0.470,0.600,0.800,0.59,0.65,0.53,0.175,0.350,0.117,57,Male,Online,Postgraduate degree
Shy,1,,1,Maybe	I was somewhat distracted.,1,Pauline Hanson,Kevin Rudd,1,0.50,0.50,0.50,0.50,0.25,0.33,0.43,L,R,Turnbull,0,4,L4,0.07,-0.15,0.650,0.350,0.600,0.425,0.607,0.503,0.600,0.500,0.620,0.510,0.600,0.500,0.50,0.51,0.56,-0.300,-0.175,-0.103,36,Female,Online,Some university, but no degree
Shy,1,,1,Yes	I put in a reasonable effort.,1,Pauline Hanson,Kevin Rudd,1,0.25,0.25,0.50,1.00,0.25,0.33,0.43,L,R,Turnbull,0,4,L4,0.07,-0.15,0.750,0.250,0.475,0.725,0.567,0.403,0.500,0.400,0.600,0.510,0.600,0.300,0.50,0.60,0.49,-0.500,0.250,-0.163,35,Male,Online,High school graduate
Shy,1,,1,Yes	I put in a reasonable effort.,1,Pauline Hanson,Kevin Rudd,1,1.00,0.00,0.00,1.00,0.25,0.33,0.43,L,R,Turnbull,0,4,L4,0.07,-0.15,0.000,0.125,0.250,0.650,0.000,0.000,0.000,0.000,0.000,0.000,0.000,0.000,0.06,0.45,0.00,0.125,0.400,0.000,37,Female,Online,3-year university degree
,1,,1,Yes	I put in a reasonable effort.,1,Pauline Hanson,Kevin Rudd,1,0.25,0.25,1.00,0.50,0.25,0.33,0.43,L,R,Turnbull,0,4,L4,0.07,-0.15,0.375,0.000,0.525,1.000,0.383,0.533,0.300,0.500,0.350,0.500,0.500,0.600,0.19,0.76,0.46,-0.375,0.475,0.150,19,Female,Lab,
,1,,1,Yes	I put in a reasonable effort.,1,Pauline Hanson,Kevin Rudd,1,0.25,0.50,0.75,0.50,0.50,0.17,0.44,L,R,Shorten,1,4,L4,0.06,-0.16,0.500,0.000,0.525,0.900,0.533,0.650,0.500,0.600,0.500,0.550,0.600,0.800,0.25,0.71,0.59,-0.500,0.375,0.117,18,Female,Lab,
Comfortable,0,No,1,Yes	I put in a reasonable effort.,1,Pauline Hanson,Kevin Rudd,1,0.25,0.50,0.50,0.25,0.50,0.67,0.44,L,R,Turnbull,0,4,L4,0.06,-0.16,0.425,0.575,0.500,0.575,0.683,0.613,0.700,0.700,0.650,0.640,0.700,0.500,0.50,0.54,0.65,0.150,0.075,-0.070,40,Male,Online,4-year university degree
,1,,1,Yes	I put in a reasonable effort.,1,Pauline Hanson,Kevin Rudd,1,0.25,0.25,0.25,0.50,0.75,0.67,0.44,L,R,Turnbull,0,4,L4,0.06,-0.16,0.475,0.300,0.600,0.800,0.600,0.623,0.600,0.700,0.600,0.670,0.600,0.500,0.39,0.70,0.61,-0.175,0.200,0.023,18,Female,Lab,
Shy,1,No,1,Yes	I put in a reasonable effort.,1,Pauline Hanson,Kevin Rudd,1,0.50,0.25,0.75,0.50,0.25,0.50,0.46,L,R,Shorten,1,4,L4,0.04,-0.18,0.850,0.825,0.850,0.750,0.713,0.660,0.700,0.800,0.740,0.680,0.700,0.500,0.84,0.80,0.69,-0.025,-0.100,-0.053,25,Female,Online,TAFE or other non-university qualification
Shy,1,No,1,Maybe	I was somewhat distracted.,1,Pauline Hanson,Kevin Rudd,1,0.25,0.50,0.25,0.50,0.75,0.50,0.46,L,R,Turnbull,0,4,L4,0.04,-0.18,0.525,0.525,0.575,0.975,0.697,0.497,0.700,0.400,0.790,0.590,0.600,0.500,0.53,0.78,0.60,0.000,0.400,-0.200,27,Male,Online,4-year university degree
Shy,1,,1,Yes	I put in a reasonable effort.,1,Pauline Hanson,Kevin Rudd,1,0.25,0.25,0.25,1.00,0.50,0.50,0.46,L,R,Turnbull,0,4,L4,0.04,-0.18,0.350,0.325,0.600,0.625,0.497,0.450,0.400,0.300,0.490,0.450,0.600,0.600,0.34,0.61,0.47,-0.025,0.025,-0.047,52,Female,Online,4-year university degree
Comfortable,0,No,1,Yes	I put in a reasonable effort.,1,Pauline Hanson,Kevin Rudd,1,0.25,0.75,0.00,0.75,0.25,0.83,0.47,L,R,Shorten,1,4,L4,0.03,-0.19,0.750,0.700,0.750,0.775,0.780,0.730,0.800,0.700,0.740,0.790,0.800,0.700,0.73,0.76,0.76,-0.050,0.025,-0.050,38,Male,Online,Postgraduate degree
Shy,1,No,1,Yes	I put in a reasonable effort.,1,Pauline Hanson,Kevin Rudd,1,0.50,0.50,0.50,0.50,0.50,0.33,0.47,L,R,Shorten,1,4,L4,0.03,-0.19,0.500,0.500,0.500,0.500,0.517,0.523,0.500,0.500,0.550,0.570,0.500,0.500,0.50,0.50,0.52,0.000,0.000,0.007,28,Male,Online,Some university, but no degree
Happy,0,No,1,Yes	I put in a reasonable effort.,1,Pauline Hanson,Kevin Rudd,1,0.25,0.75,0.25,0.50,0.50,0.67,0.49,L,R,Shorten,1,4,L4,0.01,-0.20,0.650,0.600,0.825,0.650,0.737,0.717,0.800,0.600,0.710,0.750,0.700,0.800,0.63,0.74,0.73,-0.050,-0.175,-0.020,37,Female,Online,4-year university degree
Shy,1,No,1,Yes	I put in a reasonable effort.,1,Pauline Hanson,Kevin Rudd,1,0.25,0.25,1.00,0.50,0.25,0.67,0.49,L,R,Shorten,1,4,L4,0.01,-0.20,0.700,0.000,0.650,0.750,0.640,0.503,0.600,0.600,0.620,0.510,0.700,0.400,0.35,0.70,0.57,-0.700,0.100,-0.137,19,Female,Online,Some university, but no degree
,1,,1,Yes	I put in a reasonable effort.,1,Tony Abbott,Gareth Evans,0,0.25,0.75,0.50,0.50,0.25,0.67,0.49,L,R,Turnbull,0,4,L4,0.01,-0.20,0.700,0.475,0.700,0.600,0.767,0.640,0.800,0.600,0.800,0.720,0.700,0.600,0.59,0.65,0.70,-0.225,-0.100,-0.127,24,Male,Lab,
Upset,0,,1,Yes	I put in a reasonable effort.,1,Peter Dutton,Kevin Rudd,0,0.75,0.00,1.00,0.25,0.75,0.33,0.51,R,R,Shorten,0,4,R4,0.01,-0.20,0.700,0.200,0.825,0.150,0.637,0.137,0.300,0.100,0.810,0.110,0.800,0.200,0.45,0.49,0.39,-0.500,-0.675,-0.500,72,Male,Online,High school graduate
Shy,1,,1,Maybe	I was somewhat distracted.,1,Pauline Hanson,Kevin Rudd,1,0.25,0.25,0.25,0.75,0.75,0.83,0.51,R,R,Turnbull,1,4,R4,0.01,-0.20,0.525,0.250,0.825,0.775,0.750,0.783,0.800,0.800,0.850,0.850,0.600,0.700,0.39,0.80,0.77,-0.275,-0.050,0.033,18,Male,Online,High school graduate
Shy,1,No,1,Yes	I put in a reasonable effort.,1,Pauline Hanson,Kevin Rudd,1,0.50,0.50,0.50,0.50,0.50,0.67,0.53,R,R,Shorten,0,4,R4,0.03,-0.19,0.650,0.000,0.675,0.500,0.570,0.773,0.600,0.800,0.610,0.820,0.500,0.700,0.33,0.59,0.67,-0.650,-0.175,0.203,46,Female,Online,High school graduate
Comfortable,0,No,1,Yes	I put in a reasonable effort.,1,Pauline Hanson,Kevin Rudd,1,0.25,0.50,0.75,0.50,0.50,0.67,0.53,R,R,Turnbull,1,4,R4,0.03,-0.19,0.050,0.025,0.000,0.025,0.610,0.607,0.600,0.600,0.630,0.620,0.600,0.600,0.04,0.01,0.61,-0.025,0.025,-0.003,29,Female,Online,4-year university degree
Shy,1,,1,Yes	I put in a reasonable effort.,1,Tanya Plibersek,Julie Bishop,0,0.50,0.50,0.50,0.75,0.50,0.50,0.54,R,R,Shorten,0,4,R4,0.04,-0.18,0.500,0.400,0.500,0.475,0.570,0.347,0.700,0.300,0.510,0.340,0.500,0.400,0.45,0.49,0.46,-0.100,-0.025,-0.223,36,Female,Online,4-year university degree
Shy,1,No,1,Yes	I put in a reasonable effort.,1,Pauline Hanson,Kevin Rudd,1,0.50,0.50,0.75,0.50,0.50,0.50,0.54,R,R,Shorten,0,4,R4,0.04,-0.18,0.500,0.500,0.525,0.500,0.513,0.527,0.500,0.500,0.540,0.580,0.500,0.500,0.50,0.51,0.52,0.000,-0.025,0.013,24,Female,Online,High school graduate
Shy,1,No,1,Yes	I put in a reasonable effort.,1,Pauline Hanson,Kevin Rudd,1,0.50,0.50,0.50,0.75,0.50,0.50,0.54,R,R,Shorten,0,4,R4,0.04,-0.18,0.475,0.000,0.600,0.750,0.447,0.497,0.300,0.500,0.540,0.490,0.500,0.500,0.24,0.68,0.47,-0.475,0.150,0.050,65,Male,Online,TAFE or other non-university qualification
Shy,1,No,1,Yes	I put in a reasonable effort.,1,Pauline Hanson,Kevin Rudd,1,0.50,0.50,1.00,0.25,0.50,0.50,0.54,R,R,Shorten,0,4,R4,0.04,-0.18,0.750,0.775,0.750,0.725,0.703,0.707,0.700,0.700,0.710,0.720,0.700,0.700,0.76,0.74,0.71,0.025,-0.025,0.003,43,Male,Online,TAFE or other non-university qualification
Shy,1,No,1,Yes	I put in a reasonable effort.,1,Pauline Hanson,Kevin Rudd,1,0.50,0.50,0.75,0.25,0.75,0.50,0.54,R,R,Shorten,0,4,R4,0.04,-0.18,0.825,0.075,0.825,0.075,0.963,0.037,1.000,0.000,0.890,0.110,1.000,0.000,0.45,0.45,0.50,-0.750,-0.750,-0.927,41,Male,Online,Some university, but no degree
Shy,1,No,1,Yes	I put in a reasonable effort.,1,Pauline Hanson,Kevin Rudd,1,0.50,0.50,0.75,0.50,0.50,0.50,0.54,R,R,Shorten,0,4,R4,0.04,-0.18,0.225,0.250,0.375,1.000,0.233,0.300,0.200,0.200,0.200,0.200,0.300,0.500,0.24,0.69,0.27,0.025,0.625,0.067,40,Male,Online,3-year university degree
Shy,1,No,1,Yes	I put in a reasonable effort.,1,Pauline Hanson,Kevin Rudd,1,0.50,0.25,1.00,0.25,0.75,0.50,0.54,R,R,Shorten,0,4,R4,0.04,-0.18,0.625,0.750,0.625,0.925,0.800,0.557,0.800,0.500,0.800,0.570,0.800,0.600,0.69,0.78,0.68,0.125,0.300,-0.243,57,Male,Online,4-year university degree
Shy,1,No,1,Yes	I put in a reasonable effort.,1,Pauline Hanson,Kevin Rudd,1,0.50,0.50,0.50,0.75,0.50,0.50,0.54,R,R,Turnbull,1,4,R4,0.04,-0.18,0.375,0.100,0.325,1.000,0.467,0.410,0.400,0.300,0.500,0.430,0.500,0.500,0.24,0.66,0.44,-0.275,0.675,-0.057,24,Female,Online,High school graduate
Shy,1,,1,Yes	I put in a reasonable effort.,1,Pauline Hanson,Kevin Rudd,1,0.25,0.50,0.75,0.50,0.50,0.83,0.56,R,R,Shorten,0,4,R4,0.06,-0.16,0.550,0.400,0.550,0.575,0.390,0.283,0.300,0.300,0.270,0.250,0.600,0.300,0.48,0.56,0.34,-0.150,0.025,-0.107,25,Male,Online,Some university, but no degree
Shy,1,No,1,Yes	I put in a reasonable effort.,1,Pauline Hanson,Kevin Rudd,1,0.75,0.75,0.50,0.25,0.75,0.33,0.56,R,R,Turnbull,1,4,R4,0.06,-0.16,0.825,0.250,0.800,1.000,0.933,0.967,1.000,1.000,0.900,1.000,0.900,0.900,0.54,0.90,0.95,-0.575,0.200,0.033,32,Female,Online,Postgraduate degree
Shy,1,No,1,Yes	I put in a reasonable effort.,1,Pauline Hanson,Kevin Rudd,1,0.50,0.75,0.25,0.75,0.50,0.67,0.57,R,R,Shorten,0,4,R4,0.07,-0.15,0.425,0.175,0.475,0.850,0.660,0.177,0.600,0.000,0.680,0.130,0.700,0.400,0.30,0.66,0.42,-0.250,0.375,-0.483,48,Female,Online,4-year university degree
Comfortable,0,,1,Maybe	I was somewhat distracted.,1,Peter Dutton,Kevin Rudd,0,0.75,0.75,0.25,0.50,0.50,0.67,0.57,R,R,Turnbull,1,4,R4,0.07,-0.15,0.525,0.575,0.650,0.550,0.510,0.673,0.100,0.900,0.530,0.520,0.900,0.600,0.55,0.60,0.59,0.050,-0.100,0.163,25,Male,Online,3-year university degree
,1,,1,Maybe	I was somewhat distracted.,1,Pauline Hanson,Kevin Rudd,1,0.50,0.75,0.50,0.50,0.50,0.67,0.57,R,R,Turnbull,1,4,R4,0.07,-0.15,0.550,0.000,0.475,1.000,0.470,0.633,0.500,0.700,0.510,0.600,0.400,0.600,0.28,0.74,0.55,-0.550,0.525,0.163,18,Female,Lab,
Shy,1,No,1,Yes	I put in a reasonable effort.,1,Pauline Hanson,Kevin Rudd,1,0.75,0.75,0.00,0.50,0.75,0.67,0.57,R,R,Turnbull,1,4,R4,0.07,-0.15,0.425,0.100,0.475,0.950,0.670,0.613,0.800,0.700,0.610,0.640,0.600,0.500,0.26,0.71,0.64,-0.325,0.475,-0.057,58,Male,Online,3-year university degree
Shy,1,,1,Yes	I put in a reasonable effort.,1,Pauline Hanson,Barnaby Joyce,0,0.75,0.50,0.75,0.50,0.50,0.50,0.58,R,R,Turnbull,1,4,R4,0.08,-0.14,0.375,0.500,0.450,0.500,0.337,0.483,0.300,0.500,0.410,0.450,0.300,0.500,0.44,0.48,0.41,0.125,0.050,0.147,20,Male,Online,TAFE or other non-university qualification
Shy,1,,1,Yes	I put in a reasonable effort.,1,Pauline Hanson,Kevin Rudd,1,0.50,0.50,0.75,0.75,0.50,0.50,0.58,R,R,Turnbull,1,4,R4,0.08,-0.14,0.650,0.450,0.625,0.725,0.330,0.400,0.400,0.400,0.290,0.300,0.300,0.500,0.55,0.68,0.37,-0.200,0.100,0.070,41,Male,Online,4-year university degree
,1,,1,Yes	I put in a reasonable effort.,1,Pauline Hanson,Kevin Rudd,1,0.50,0.75,0.75,0.25,0.75,0.50,0.58,R,R,Turnbull,1,4,R4,0.08,-0.14,0.375,0.125,0.400,0.525,0.317,0.473,0.400,0.700,0.350,0.420,0.200,0.300,0.25,0.46,0.40,-0.250,0.125,0.157,22,Male,Lab,
Comfortable,0,Yes,0,Yes	I put in a reasonable effort.,1,Pauline Hanson,Kevin Rudd,1,0.25,0.75,0.50,0.75,0.50,0.83,0.60,R,R,Shorten,0,4,R4,0.10,-0.12,0.625,0.675,0.675,0.675,0.660,0.637,0.700,0.600,0.580,0.610,0.700,0.700,0.65,0.68,0.65,0.050,0.000,-0.023,31,Male,Online,4-year university degree
,1,,1,Yes	I put in a reasonable effort.,1,Pauline Hanson,Kevin Rudd,1,0.50,0.50,1.00,0.75,0.50,0.33,0.60,R,R,Shorten,0,4,R4,0.10,-0.12,0.625,0.350,0.550,0.800,0.497,0.453,0.700,0.500,0.490,0.460,0.300,0.400,0.49,0.68,0.48,-0.275,0.250,-0.043,17,Female,Lab,
,1,,1,Yes	I put in a reasonable effort.,1,Pauline Hanson,Kevin Rudd,1,0.75,0.75,0.50,0.25,0.75,0.67,0.61,R,R,Shorten,0,4,R4,0.11,-0.11,0.700,0.625,0.425,0.625,0.517,0.600,0.500,0.500,0.650,0.700,0.400,0.600,0.66,0.53,0.56,-0.075,0.200,0.083,19,Male,Lab,
Shy,1,,1,Yes	I put in a reasonable effort.,1,Pauline Hanson,Kevin Rudd,1,1.00,1.00,1.00,0.50,0.00,0.17,0.61,R,R,Turnbull,1,4,R4,0.11,-0.11,0.650,0.075,0.675,0.700,0.280,0.230,0.100,0.000,0.240,0.190,0.500,0.500,0.36,0.69,0.26,-0.575,0.025,-0.050,27,Male,Online,High school graduate
Shy,1,No,1,Yes	I put in a reasonable effort.,1,Pauline Hanson,Kevin Rudd,1,0.75,0.50,0.50,0.75,0.75,0.50,0.63,R,R,Shorten,0,4,R4,0.13,-0.09,0.675,0.000,0.650,0.625,0.563,0.387,0.600,0.400,0.590,0.360,0.500,0.400,0.34,0.64,0.48,-0.675,-0.025,-0.177,18,Female,Online,Some university, but no degree
Shy,1,,1,Yes	I put in a reasonable effort.,1,Pauline Hanson,Kevin Rudd,1,0.75,0.75,0.50,0.50,0.75,0.50,0.63,R,R,Shorten,0,4,R4,0.13,-0.09,0.350,0.200,0.900,0.850,0.400,0.433,0.400,0.400,0.400,0.400,0.400,0.500,0.28,0.88,0.42,-0.150,-0.050,0.033,24,Male,Online,Postgraduate degree
Shy,1,No,1,Yes	I put in a reasonable effort.,1,Pauline Hanson,Kevin Rudd,1,0.25,1.00,0.75,0.75,0.25,0.83,0.64,R,R,Shorten,0,4,R4,0.14,-0.08,0.775,0.350,0.750,0.550,0.913,0.720,1.000,0.800,0.840,0.660,0.900,0.700,0.56,0.65,0.82,-0.425,-0.200,-0.193,25,Male,Online,Postgraduate degree
Shy,1,,1,Yes	I put in a reasonable effort.,1,Pauline Hanson,Kevin Rudd,1,0.75,0.75,0.75,0.50,0.75,0.33,0.64,R,R,Shorten,0,4,R4,0.14,-0.08,0.600,0.400,0.600,0.400,0.770,0.570,0.700,0.500,0.810,0.610,0.800,0.600,0.50,0.50,0.67,-0.200,-0.200,-0.200,51,Male,Online,High school graduate
Shy,1,No,1,Yes	I put in a reasonable effort.,1,Pauline Hanson,Kevin Rudd,1,0.25,0.75,0.75,0.75,0.75,0.67,0.65,R,R,Shorten,0,4,R4,0.15,-0.07,0.425,0.350,0.400,0.875,0.317,0.400,0.300,0.300,0.350,0.400,0.300,0.500,0.39,0.64,0.36,-0.075,0.475,0.083,42,Female,Online,TAFE or other non-university qualification
Shy,1,,1,Yes	I put in a reasonable effort.,1,Pauline Hanson,Kevin Rudd,1,0.50,0.75,1.00,0.50,0.50,0.67,0.65,R,R,Shorten,0,4,R4,0.15,-0.07,0.400,0.000,0.875,1.000,0.550,0.610,0.500,0.700,0.550,0.530,0.600,0.600,0.20,0.94,0.58,-0.400,0.125,0.060,28,Female,Online,Some university, but no degree
Comfortable,0,,1,Yes	I put in a reasonable effort.,1,Pauline Hanson,Kevin Rudd,1,0.50,0.75,0.75,0.50,0.75,0.67,0.65,R,R,Turnbull,1,4,R4,0.15,-0.07,0.650,0.650,0.675,0.575,0.673,0.560,0.700,0.500,0.620,0.580,0.700,0.600,0.65,0.63,0.62,0.000,-0.100,-0.113,49,Male,Online,High school graduate
Shy,1,No,1,Yes	I put in a reasonable effort.,1,Pauline Hanson,Kevin Rudd,1,0.50,0.75,0.75,0.50,0.75,0.67,0.65,R,R,Turnbull,1,4,R4,0.15,-0.07,0.450,0.225,0.550,0.850,0.510,0.510,0.500,0.500,0.530,0.530,0.500,0.500,0.34,0.70,0.51,-0.225,0.300,0.000,38,Female,Online,Postgraduate degree
,1,,1,Yes	I put in a reasonable effort.,1,Pauline Hanson,Kevin Rudd,1,0.75,0.75,0.75,0.50,0.75,0.50,0.67,R,R,Shorten,0,4,R4,0.17,-0.05,0.675,0.000,0.700,0.975,0.167,0.200,0.000,0.000,0.100,0.100,0.400,0.500,0.34,0.84,0.18,-0.675,0.275,0.033,42,Female,Lab,
,1,,1,Yes	I put in a reasonable effort.,1,Pauline Hanson,Kevin Rudd,1,0.50,0.75,0.75,0.75,0.75,0.50,0.67,R,R,Shorten,0,4,R4,0.17,-0.05,0.775,0.500,0.675,0.500,0.500,0.500,0.500,0.500,0.500,0.500,0.500,0.500,0.64,0.59,0.50,-0.275,-0.175,0.000,19,Female,Lab,
Shy,1,No,1,Yes	I put in a reasonable effort.,1,Pauline Hanson,Kevin Rudd,1,0.50,0.75,1.00,0.50,0.75,0.50,0.67,R,R,Turnbull,1,4,R4,0.17,-0.05,0.625,0.225,0.500,0.775,0.680,0.723,0.800,0.700,0.640,0.770,0.600,0.700,0.43,0.64,0.70,-0.400,0.275,0.043,29,Female,Online,3-year university degree
,1,,1,Yes	I put in a reasonable effort.,1,Pauline Hanson,Kevin Rudd,1,0.75,0.75,0.75,0.75,0.50,0.50,0.67,R,R,Turnbull,1,4,R4,0.17,-0.05,0.575,0.250,0.650,0.850,0.687,0.647,0.600,0.600,0.660,0.640,0.800,0.700,0.41,0.75,0.67,-0.325,0.200,-0.040,18,Male,Lab,
,1,,1,Yes	I put in a reasonable effort.,1,Pauline Hanson,Kevin Rudd,1,0.75,0.75,0.75,0.50,0.75,0.50,0.67,R,R,Turnbull,1,4,R4,0.17,-0.05,0.575,0.125,0.400,0.925,0.567,0.600,0.500,0.600,0.500,0.500,0.700,0.700,0.35,0.66,0.58,-0.450,0.525,0.033,19,Male,Lab,
Shy,1,No,1,Yes	I put in a reasonable effort.,1,Pauline Hanson,Kevin Rudd,1,0.75,0.75,1.00,0.75,0.50,0.33,0.68,R,R,Shorten,0,4,R4,0.18,-0.04,0.225,0.000,0.600,0.800,0.200,0.267,0.000,0.000,0.200,0.300,0.400,0.500,0.11,0.70,0.23,-0.225,0.200,0.067,48,Female,Online,Postgraduate degree
Shy,1,No,1,Yes	I put in a reasonable effort.,1,Pauline Hanson,Kevin Rudd,1,0.50,0.75,0.75,0.75,0.75,0.67,0.69,R,R,Shorten,0,4,R4,0.19,-0.02,0.550,0.500,0.550,1.000,0.037,0.113,0.000,0.000,0.010,0.040,0.100,0.300,0.53,0.78,0.08,-0.050,0.450,0.077,38,Female,Online,High school graduate
,1,,1,Yes	I put in a reasonable effort.,1,Pauline Hanson,Kevin Rudd,1,0.75,0.75,0.75,0.50,0.75,0.67,0.69,R,R,Shorten,0,4,R4,0.19,-0.02,0.500,0.000,0.600,1.000,0.367,0.433,0.400,0.400,0.300,0.300,0.400,0.600,0.25,0.80,0.40,-0.500,0.400,0.067,26,Female,Lab,
Shy,1,,1,Yes	I put in a reasonable effort.,1,Pauline Hanson,Kevin Rudd,1,0.50,0.75,0.75,0.75,0.75,0.83,0.72,R,R,Turnbull,1,4,R4,0.22,0.00,0.925,0.250,0.750,0.500,0.767,0.600,0.800,0.600,0.800,0.600,0.700,0.600,0.59,0.63,0.68,-0.675,-0.250,-0.167,29,Male,Online,Some university, but no degree
,1,,1,Yes	I put in a reasonable effort.,1,Pauline Hanson,Julie Bishop,0,0.75,0.75,0.75,0.75,0.75,0.67,0.74,R,R,Shorten,0,4,R4,0.24,0.02,0.475,0.375,0.450,0.625,0.500,0.503,0.500,0.400,0.500,0.510,0.500,0.600,0.43,0.54,0.50,-0.100,0.175,0.003,20,Female,Lab,
Shy,1,,1,Yes	I put in a reasonable effort.,1,Pauline Hanson,Kevin Rudd,1,0.75,0.75,1.00,0.50,0.75,0.67,0.74,R,R,Shorten,0,4,R4,0.24,0.02,0.500,0.000,0.525,0.875,0.093,0.260,0.000,0.000,0.080,0.080,0.200,0.700,0.25,0.70,0.18,-0.500,0.350,0.167,55,Male,Online,Postgraduate degree
Shy,1,,1,Yes	I put in a reasonable effort.,1,Pauline Hanson,Kevin Rudd,1,0.75,0.75,1.00,0.50,0.75,0.67,0.74,R,R,Turnbull,1,4,R4,0.24,0.02,0.575,0.000,0.825,1.000,0.530,0.503,0.500,0.500,0.490,0.510,0.600,0.500,0.29,0.91,0.52,-0.575,0.175,-0.027,34,Female,Online,4-year university degree
,1,,1,Yes	I put in a reasonable effort.,1,Pauline Hanson,Kevin Rudd,1,0.75,1.00,0.75,0.50,0.75,0.67,0.74,R,R,Turnbull,1,4,R4,0.24,0.02,0.400,0.175,0.625,0.950,0.650,0.607,0.600,0.500,0.650,0.620,0.700,0.700,0.29,0.79,0.63,-0.225,0.325,-0.043,18,Female,Lab,
,1,,1,Yes	I put in a reasonable effort.,1,Pauline Hanson,Kevin Rudd,1,0.75,0.75,1.00,0.50,0.75,0.67,0.74,R,R,Turnbull,1,4,R4,0.24,0.02,0.525,0.075,0.475,0.950,0.617,0.717,0.600,0.700,0.650,0.750,0.600,0.700,0.30,0.71,0.67,-0.450,0.475,0.100,20,Male,Lab,
Shy,1,No,1,Yes	I put in a reasonable effort.,1,Pauline Hanson,Kevin Rudd,1,0.75,0.75,1.00,0.75,0.75,0.50,0.75,R,R,Turnbull,1,4,R4,0.25,0.03,0.600,0.250,0.475,0.750,0.050,0.127,0.000,0.000,0.050,0.080,0.100,0.300,0.43,0.61,0.09,-0.350,0.275,0.077,63,Male,Online,TAFE or other non-university qualification
Shy,1,,1,Yes	I put in a reasonable effort.,1,Pauline Hanson,Kevin Rudd,1,0.75,0.50,1.00,0.75,0.75,0.83,0.76,R,R,Shorten,0,4,R4,0.26,0.05,0.500,0.200,0.650,0.650,0.350,0.350,0.400,0.400,0.350,0.350,0.300,0.300,0.35,0.65,0.35,-0.300,0.000,0.000,23,Other / Prefer not to say,Online,Some university, but no degree
Shy,1,No,1,Yes	I put in a reasonable effort.,1,Pauline Hanson,Kevin Rudd,1,0.75,0.75,1.00,0.50,0.75,0.83,0.76,R,R,Turnbull,1,4,R4,0.26,0.05,0.600,0.525,0.625,0.925,0.717,0.767,0.700,0.800,0.750,0.800,0.700,0.700,0.56,0.78,0.74,-0.075,0.300,0.050,28,Male,Online,Some university, but no degree
Shy,1,,1,Yes	I put in a reasonable effort.,1,Pauline Hanson,Kevin Rudd,1,0.75,0.75,0.75,1.00,0.75,0.67,0.78,R,R,Shorten,0,4,R4,0.28,0.06,0.525,0.425,0.425,0.700,0.433,0.553,0.400,0.500,0.400,0.560,0.500,0.600,0.48,0.56,0.49,-0.100,0.275,0.120,43,Male,Online,Some university, but no degree
Shy,1,,1,Yes	I put in a reasonable effort.,1,Pauline Hanson,Peter Garrett,0,0.75,0.75,1.00,0.50,1.00,0.67,0.78,R,R,Turnbull,1,4,R4,0.28,0.06,0.500,0.000,0.725,0.875,0.590,0.670,0.600,0.700,0.570,0.710,0.600,0.600,0.25,0.80,0.63,-0.500,0.150,0.080,19,Female,Online,TAFE or other non-university qualification
Shy,1,,1,Yes	I put in a reasonable effort.,1,Pauline Hanson,Kevin Rudd,1,0.75,0.75,1.00,0.75,0.75,0.83,0.81,R,R,Turnbull,1,4,R4,0.31,0.09,0.750,0.075,0.725,1.000,0.733,0.633,0.800,0.600,0.700,0.700,0.700,0.600,0.41,0.86,0.68,-0.675,0.275,-0.100,55,Female,Online,High school graduate
,1,,1,Yes	I put in a reasonable effort.,1,Pauline Hanson,Kevin Rudd,1,0.75,1.00,0.75,0.75,0.75,0.83,0.81,R,R,Turnbull,1,4,R4,0.31,0.09,0.300,0.000,0.525,1.000,0.683,0.667,0.700,0.700,0.650,0.700,0.700,0.600,0.15,0.76,0.68,-0.300,0.475,-0.017,19,Female,Lab,
,1,,1,Yes	I put in a reasonable effort.,1,Pauline Hanson,Kevin Rudd,1,1.00,0.75,1.00,0.75,0.75,0.67,0.82,R,R,Shorten,0,4,R4,0.32,0.10,0.475,0.050,0.525,0.725,0.167,0.233,0.000,0.000,0.200,0.200,0.300,0.500,0.26,0.63,0.20,-0.425,0.200,0.067,19,Female,Lab,
Comfortable,0,No,1,Yes	I put in a reasonable effort.,1,Pauline Hanson,Kevin Rudd,1,1.00,1.00,1.00,0.25,0.75,1.00,0.83,R,R,Turnbull,1,4,R4,0.33,0.11,0.800,0.800,0.800,0.775,0.797,0.787,0.800,0.800,0.790,0.760,0.800,0.800,0.80,0.79,0.79,0.000,-0.025,-0.010,56,Male,Online,4-year university degree
Shy,1,No,1,Yes	I put in a reasonable effort.,1,Pauline Hanson,Kevin Rudd,1,1.00,0.75,0.75,1.00,0.75,0.83,0.85,R,R,Shorten,0,4,R4,0.35,0.13,0.325,0.000,0.425,1.000,0.067,0.100,0.000,0.000,0.000,0.000,0.200,0.300,0.16,0.71,0.08,-0.325,0.575,0.033,29,Male,Online,TAFE or other non-university qualification
,1,,1,Yes	I put in a reasonable effort.,1,Pauline Hanson,Kevin Rudd,1,0.75,1.00,1.00,0.50,1.00,0.83,0.85,R,R,Shorten,0,4,R4,0.35,0.13,0.425,0.075,0.625,0.900,0.303,0.220,0.200,0.200,0.310,0.160,0.400,0.300,0.25,0.76,0.26,-0.350,0.275,-0.083,19,Female,Lab,
,1,,1,Yes	I put in a reasonable effort.,1,Pauline Hanson,Kevin Rudd,1,1.00,1.00,1.00,0.25,1.00,0.83,0.85,R,R,Turnbull,1,4,R4,0.35,0.13,0.525,0.000,0.475,1.000,0.827,0.700,1.000,0.700,0.780,0.800,0.700,0.600,0.26,0.74,0.76,-0.525,0.525,-0.127,45,Female,Lab,
Shy,1,No,1,Yes	I put in a reasonable effort.,1,Pauline Hanson,Kevin Rudd,1,1.00,1.00,1.00,0.75,0.75,0.67,0.86,R,R,Shorten,0,4,R4,0.36,0.14,0.625,0.000,0.550,0.600,0.233,0.167,0.100,0.100,0.200,0.200,0.400,0.200,0.31,0.58,0.20,-0.625,0.050,-0.067,75,Male,Online,Some university, but no degree
Comfortable,0,No,1,Yes	I put in a reasonable effort.,1,Pauline Hanson,Kevin Rudd,1,1.00,0.75,1.00,0.75,1.00,0.83,0.89,R,R,Shorten,0,4,R4,0.39,0.17,0.500,0.575,0.425,0.575,0.057,0.597,0.000,0.600,0.070,0.690,0.100,0.500,0.54,0.50,0.33,0.075,0.150,0.540,30,Male,Online,TAFE or other non-university qualification
Shy,1,,1,Yes	I put in a reasonable effort.,1,Pauline Hanson,Kevin Rudd,1,1.00,1.00,1.00,0.50,1.00,0.83,0.89,R,R,Shorten,0,4,R4,0.39,0.17,0.275,0.000,0.450,1.000,0.100,0.167,0.000,0.000,0.100,0.200,0.200,0.300,0.14,0.73,0.13,-0.275,0.550,0.067,38,Female,Online,Some university, but no degree
,1,,1,Yes	I put in a reasonable effort.,1,Pauline Hanson,Kevin Rudd,1,1.00,1.00,1.00,0.50,1.00,0.83,0.89,R,R,Shorten,0,4,R4,0.39,0.17,0.675,0.350,0.575,0.950,0.300,0.200,0.000,0.000,0.500,0.400,0.400,0.200,0.51,0.76,0.25,-0.325,0.375,-0.100,20,Female,Lab,
,1,,1,Yes	I put in a reasonable effort.,1,Tanya Plibersek,Kevin Rudd,0,1.00,0.75,1.00,0.75,1.00,0.83,0.89,R,R,Turnbull,1,4,R4,0.39,0.17,0.225,0.000,0.725,1.000,0.557,0.383,0.500,0.400,0.570,0.450,0.600,0.300,0.11,0.86,0.47,-0.225,0.275,-0.173,18,Female,Lab,
Shy,1,,1,Yes	I put in a reasonable effort.,1,Pauline Hanson,Kevin Rudd,1,1.00,1.00,1.00,0.50,1.00,0.83,0.89,R,R,Turnbull,1,4,R4,0.39,0.17,0.525,0.225,0.625,0.925,0.703,0.713,0.700,0.700,0.710,0.740,0.700,0.700,0.38,0.78,0.71,-0.300,0.300,0.010,38,Male,Online,Some university, but no degree
Shy,1,No,1,Yes	I put in a reasonable effort.,1,Pauline Hanson,Kevin Rudd,1,1.00,1.00,1.00,1.00,1.00,0.50,0.92,R,R,Shorten,0,4,R4,0.42,0.20,0.500,1.000,0.625,1.000,0.000,0.333,0.000,1.000,0.000,0.000,0.000,0.000,0.75,0.81,0.17,0.500,0.375,0.333,58,Female,Online,High school graduate
,1,,1,Yes	I put in a reasonable effort.,1,Pauline Hanson,Kevin Rudd,1,1.00,1.00,1.00,0.75,1.00,0.83,0.93,R,R,Turnbull,1,4,R4,0.43,0.21,0.450,0.000,0.625,1.000,0.667,0.623,0.700,0.600,0.700,0.670,0.600,0.600,0.23,0.81,0.65,-0.450,0.375,-0.043,27,Male,Lab,
Shy,1,No,1,Yes	I put in a reasonable effort.,1,Pauline Hanson,Kevin Rudd,1,1.00,1.00,1.00,1.00,1.00,0.67,0.94,R,R,Shorten,0,4,R4,0.44,0.23,0.425,0.000,0.625,0.450,0.253,0.317,0.000,0.200,0.260,0.250,0.500,0.500,0.21,0.54,0.29,-0.425,-0.175,0.063,64,Female,Online,High school graduate
Shy,1,No,1,Yes	I put in a reasonable effort.,1,Pauline Hanson,Kevin Rudd,1,1.00,1.00,1.00,1.00,1.00,0.83,0.97,R,R,Shorten,0,4,R4,0.47,0.25,0.175,0.000,0.225,1.000,0.000,0.100,0.000,0.000,0.000,0.000,0.000,0.300,0.09,0.61,0.05,-0.175,0.775,0.100,61,Male,Online,High school graduate
Shy,1,,1,Yes	I put in a reasonable effort.,1,Pauline Hanson,Kevin Rudd,1,1.00,1.00,1.00,1.00,1.00,0.83,0.97,R,R,Shorten,0,4,R4,0.47,0.25,0.600,0.000,0.875,0.500,0.000,0.100,0.000,0.000,0.000,0.000,0.000,0.300,0.30,0.69,0.05,-0.600,-0.375,0.100,22,Male,Online,TAFE or other non-university qualification
Shy,1,No,1,Yes	I put in a reasonable effort.,1,Pauline Hanson,Kevin Rudd,1,1.00,1.00,1.00,1.00,1.00,0.83,0.97,R,R,Turnbull,1,4,R4,0.47,0.25,0.650,0.500,0.700,0.625,0.437,0.433,0.400,0.400,0.410,0.400,0.500,0.500,0.58,0.66,0.44,-0.150,-0.075,-0.003,75,Female,Online,TAFE or other non-university qualification
Shy,1,,1,Yes	I put in a reasonable effort.,1,Pauline Hanson,Kevin Rudd,1,1.00,1.00,1.00,1.00,1.00,0.83,0.97,R,R,Turnbull,1,4,R4,0.47,0.25,0.775,0.025,0.900,1.000,0.433,0.337,0.600,0.400,0.300,0.210,0.400,0.400,0.40,0.95,0.39,-0.750,0.100,-0.097,36,Male,Online,3-year university degree
Shy,1,,1,Yes	I put in a reasonable effort.,1,Pauline Hanson,Kevin Rudd,1,1.00,1.00,1.00,1.00,1.00,1.00,1.00,R,R,Shorten,0,4,R4,0.50,0.28,0.500,0.550,0.375,0.550,0.200,0.197,0.000,0.000,0.100,0.090,0.500,0.500,0.53,0.46,0.20,0.050,0.175,-0.003,55,Female,Online,Some university, but no degree
Confused,0,,1,Maybe	I was somewhat distracted.,1,Tony Abbott,Kevin Rudd,0,0.50,0.50,0.50,0.50,0.50,0.50,0.50,,R,Shorten,1,4,,0.00,-0.22,0.500,0.600,0.500,0.600,0.503,0.570,0.500,0.600,0.510,0.510,0.500,0.600,0.55,0.55,0.54,0.100,0.100,0.067,32,Male,Online,3-year university degree
,1,,1,Yes	I put in a reasonable effort.,1,Kristina Keneally,Corey Bernardi,0,0.50,0.50,0.50,0.50,0.50,0.50,0.50,,R,Shorten,1,4,,0.00,-0.22,0.550,0.200,0.750,0.900,0.500,0.437,0.500,0.500,0.500,0.410,0.500,0.400,0.38,0.83,0.47,-0.350,0.150,-0.063,20,Female,Lab,
,1,,1,Yes	I put in a reasonable effort.,1,Tanya Plibersek,Julie Bishop,0,0.50,0.50,0.50,0.50,0.50,0.50,0.50,,R,Shorten,1,4,,0.00,-0.22,0.425,0.000,0.550,0.825,0.533,0.383,0.500,0.300,0.500,0.350,0.600,0.500,0.21,0.69,0.46,-0.425,0.275,-0.150,19,Female,Lab,
Happy,0,No,1,Yes	I put in a reasonable effort.,1,Pauline Hanson,Kevin Rudd,1,0.25,0.50,0.25,0.75,0.75,0.50,0.50,,R,Shorten,1,4,,0.00,-0.22,0.525,0.400,0.550,0.425,0.610,0.467,0.700,0.400,0.630,0.600,0.500,0.400,0.46,0.49,0.54,-0.125,-0.125,-0.143,29,Male,Online,Postgraduate degree
None of the above,0,No,1,Yes	I put in a reasonable effort.,1,Pauline Hanson,Kevin Rudd,1,0.50,0.50,0.50,0.50,0.50,0.50,0.50,,R,Shorten,1,4,,0.00,-0.22,0.500,0.500,0.500,0.500,0.503,0.503,0.500,0.500,0.510,0.510,0.500,0.500,0.50,0.50,0.50,0.000,0.000,0.000,50,Female,Online,High school graduate
Shy,1,,1,Maybe	I was somewhat distracted.,1,Pauline Hanson,Kevin Rudd,1,0.50,0.50,0.50,0.50,0.50,0.50,0.50,,R,Shorten,1,4,,0.00,-0.22,0.500,0.500,0.500,0.500,0.500,0.500,0.500,0.500,0.500,0.500,0.500,0.500,0.50,0.50,0.50,0.000,0.000,0.000,23,Male,Online,3-year university degree
Shy,1,No,1,Yes	I put in a reasonable effort.,1,Pauline Hanson,Kevin Rudd,1,0.50,0.50,0.50,0.50,0.50,0.50,0.50,,R,Shorten,1,4,,0.00,-0.22,0.600,0.325,0.600,0.525,0.600,0.467,0.500,0.400,0.500,0.300,0.800,0.700,0.46,0.56,0.53,-0.275,-0.075,-0.133,26,Male,Online,Did not graduate from high school
Shy,1,No,1,Yes	I put in a reasonable effort.,1,Pauline Hanson,Kevin Rudd,1,0.50,0.50,0.50,0.50,0.50,0.50,0.50,,R,Shorten,1,4,,0.00,-0.22,0.425,0.375,0.500,0.725,0.500,0.500,0.500,0.500,0.500,0.500,0.500,0.500,0.40,0.61,0.50,-0.050,0.225,0.000,56,Male,Online,TAFE or other non-university qualification
Shy,1,,1,Yes	I put in a reasonable effort.,1,Pauline Hanson,Kevin Rudd,1,0.50,0.50,0.50,0.50,0.50,0.50,0.50,,R,Shorten,1,4,,0.00,-0.22,0.550,0.250,0.700,0.750,0.033,0.067,0.000,0.000,0.000,0.000,0.100,0.200,0.40,0.73,0.05,-0.300,0.050,0.033,35,Female,Online,Did not graduate from high school
Shy,1,,1,Yes	I put in a reasonable effort.,1,Pauline Hanson,Kevin Rudd,1,0.50,0.50,0.50,0.50,0.50,0.50,0.50,,R,Shorten,1,4,,0.00,-0.22,0.500,0.300,0.500,0.900,0.503,0.503,0.500,0.500,0.510,0.510,0.500,0.500,0.40,0.70,0.50,-0.200,0.400,0.000,22,Male,Online,Some university, but no degree
Shy,1,,1,Yes	I put in a reasonable effort.,1,Pauline Hanson,Kevin Rudd,1,0.50,0.50,0.50,0.50,0.50,0.50,0.50,,R,Shorten,1,4,,0.00,-0.22,0.525,0.350,0.650,0.800,0.400,0.433,0.400,0.400,0.400,0.400,0.400,0.500,0.44,0.73,0.42,-0.175,0.150,0.033,18,Male,Online,Some university, but no degree
Happy,0,,1,Yes	I put in a reasonable effort.,1,Peter Dutton,Kevin Rudd,0,0.50,0.75,0.75,0.50,0.00,0.50,0.50,,R,Turnbull,1,4,,0.00,-0.22,0.700,0.650,0.550,0.650,0.767,0.633,0.800,0.800,0.700,0.600,0.800,0.500,0.68,0.60,0.70,-0.050,0.100,-0.133,23,Male,Online,High school graduate
,1,,1,Yes	I put in a reasonable effort.,1,Tony Abbott,Kevin Rudd,0,0.50,0.50,0.50,0.50,0.50,0.50,0.50,,R,Turnbull,1,4,,0.00,-0.22,0.450,0.275,0.475,0.525,0.433,0.467,0.400,0.400,0.500,0.500,0.400,0.500,0.36,0.50,0.45,-0.175,0.050,0.033,20,Female,Lab,
Shy,1,Yes,0,Yes	I put in a reasonable effort.,1,Pauline Hanson,Kevin Rudd,1,0.50,0.50,0.50,0.50,0.50,0.50,0.50,,R,Turnbull,1,4,,0.00,-0.22,0.475,0.500,0.450,0.475,0.520,0.497,0.500,0.500,0.560,0.590,0.500,0.400,0.49,0.46,0.51,0.025,0.025,-0.023,29,Male,Online,4-year university degree
Comfortable,0,No,1,Yes	I put in a reasonable effort.,1,Pauline Hanson,Kevin Rudd,1,0.50,0.50,0.50,0.50,0.50,0.50,0.50,,R,Turnbull,1,4,,0.00,-0.22,0.625,0.200,0.675,0.550,0.740,0.737,0.700,0.800,0.720,0.710,0.800,0.700,0.41,0.61,0.74,-0.425,-0.125,-0.003,18,Female,Online,High school graduate
None of the above,0,No,1,Yes	I put in a reasonable effort.,1,Pauline Hanson,Kevin Rudd,1,0.50,0.50,0.50,0.50,0.50,0.50,0.50,,R,Turnbull,1,4,,0.00,-0.22,0.625,0.575,0.725,0.800,0.503,0.467,0.500,0.500,0.510,0.500,0.500,0.400,0.60,0.76,0.49,-0.050,0.075,-0.037,62,Female,Online,TAFE or other non-university qualification
Shy,1,No,1,Maybe	I was somewhat distracted.,1,Pauline Hanson,Kevin Rudd,1,0.50,0.50,0.50,0.50,0.50,0.50,0.50,,R,Turnbull,1,4,,0.00,-0.22,0.500,0.475,0.500,0.500,0.167,0.333,0.000,0.500,0.500,0.500,0.000,0.000,0.49,0.50,0.25,-0.025,0.000,0.167,32,Female,Online,High school graduate
,1,,1,Maybe	I was somewhat distracted.,1,Pauline Hanson,Kevin Rudd,1,0.50,0.50,0.50,0.50,0.50,0.50,0.50,,R,Turnbull,1,4,,0.00,-0.22,0.650,0.000,0.525,0.725,0.783,0.797,0.700,0.900,0.850,0.890,0.800,0.600,0.33,0.63,0.79,-0.650,0.200,0.013,22,Female,Lab,
Shy,1,No,1,Yes	I put in a reasonable effort.,1,Pauline Hanson,Kevin Rudd,1,0.50,0.50,0.50,0.50,0.50,0.50,0.50,,R,Turnbull,1,4,,0.00,-0.22,0.350,0.300,0.550,0.625,0.233,0.233,0.200,0.200,0.100,0.100,0.400,0.400,0.33,0.59,0.23,-0.050,0.075,0.000,47,Female,Online,TAFE or other non-university qualification
Shy,1,No,1,Yes	I put in a reasonable effort.,1,Pauline Hanson,Kevin Rudd,1,0.50,0.50,0.50,0.50,0.50,0.50,0.50,,R,Turnbull,1,4,,0.00,-0.22,0.350,0.650,0.525,0.600,0.000,0.200,0.000,0.000,0.000,0.000,0.000,0.600,0.50,0.56,0.10,0.300,0.075,0.200,25,Male,Online,4-year university degree
Shy,1,No,1,Yes	I put in a reasonable effort.,1,Pauline Hanson,Kevin Rudd,1,0.50,0.50,0.50,0.50,0.50,0.50,0.50,,R,Turnbull,1,4,,0.00,-0.22,0.675,0.000,0.475,0.825,0.433,0.437,0.500,0.500,0.300,0.310,0.500,0.500,0.34,0.65,0.44,-0.675,0.350,0.003,44,Female,Online,Postgraduate degree
Shy,1,,1,Yes	I put in a reasonable effort.,1,Pauline Hanson,Kevin Rudd,1,0.50,0.50,0.50,0.50,0.50,0.50,0.50,,R,Turnbull,1,4,,0.00,-0.22,0.575,0.600,0.500,0.625,0.537,0.600,0.500,0.600,0.510,0.600,0.600,0.600,0.59,0.56,0.57,0.025,0.125,0.063,21,Male,Online,4-year university degree
Shy,1,,1,Yes	I put in a reasonable effort.,1,Pauline Hanson,Kevin Rudd,1,0.50,0.50,0.50,0.50,0.50,0.50,0.50,,R,Turnbull,1,4,,0.00,-0.22,0.500,0.400,0.550,0.500,0.700,0.703,0.700,0.700,0.700,0.710,0.700,0.700,0.45,0.53,0.70,-0.100,-0.050,0.003,25,Male,Online,Postgraduate degree
